# Supplementary material for: Synthesis of 3-(4-oxo-4H-chromen-3-yl)acrylates through the tandem reaction of 3-(2-buta-2,3-dienoylphenoxy)acrylates
Source: Royal Society of Chemistry journal article supplement (doi:10.1039/c4ra00277f), 2014-01-01
Supplement: c4ra00277f1.pdf [file c4ra00277f1.pdf]

## Supporting Information

### Synthesis of 3-(4-oxo-4*H*-chromen-3-yl)acrylates through the tandem reactions of 3-(2-buta-2,3-dienoylphenoxy)acrylates

Xuesen Fan,\* Nana Shen, Bin Li, Shenghai Guo, and Xinying Zhang\*

*School of Chemistry and Chemical Engineering, Collaborative Innovation Center of Henan Province for Green Manufacturing of Fine Chemicals, Henan Key Laboratory for Environmental Pollution Control, Henan Normal University, Xinxiang, Henan 453007, P. R. China. E-mail: xuesen.fan@htu.cn; xinyingzhang@htu.cn*

#### Table of Contents

|                                                                                           |               |
|-------------------------------------------------------------------------------------------|---------------|
| <b>I. Experimental details and spectroscopic data</b>                                     | <b>P2-11</b>  |
| <b>II. Copies of <sup>1</sup>H and <sup>13</sup>C NMR spectra of II, III, IV</b>          | <b>P12-14</b> |
| <b>III. Copies of <sup>1</sup>H and <sup>13</sup>C NMR spectra of 1a-1j, 1l-1m, 1q-1r</b> | <b>P15-28</b> |
| <b>IV. Copies of <sup>1</sup>H and <sup>13</sup>C NMR spectra of 2a-2r</b>                | <b>P29-46</b> |
| <b>V. X-ray crystal structure of 2d</b>                                                   | <b>P47</b>    |
| <b>VI. References</b>                                                                     | <b>P48</b>    |

## I. Experimental details and spectroscopic data

### 1. General experimental information

The  $^1\text{H}$ ,  $^{13}\text{C}$  NMR spectra were recorded at 400 MHz or 100 MHz, respectively. Chemical shifts were reported in ppm from tetramethylsilane (TMS) as internal standard in  $\text{CDCl}_3$  solutions. Multiplicity was indicated as follows: s (singlet); d (doublet); t (triplet); m (multiplet); dd (doublet of doublets), etc. and coupling constants were given in Hz. High resolution mass spectra (HRMS) were performed on a time-of-flight (microTOF) mass spectrometer. The conversion of starting materials were monitored by thin layer chromatography (TLC) using silica gel plates (silica gel 60 F254 0.25 mm) and components were visualized by observation under UV light (254 and 365 nm).

### 2. Synthetic procedure for the synthesis of ethyl 3-(2-buta-2,3-dienoylphenoxy)acrylate (1a)

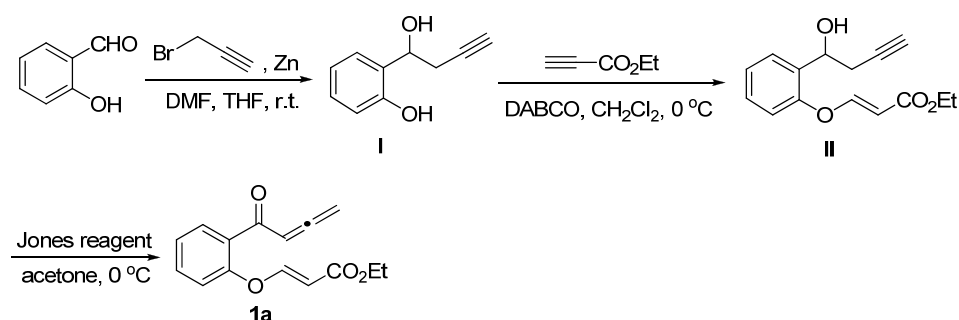

#### 2.1 Procedure for the synthesis of 2-(1-hydroxybut-3-ynyl)phenol (**I**)<sup>[1]</sup>

To a flask containing 2-hydroxybenzaldehyde (5 mmol), THF (10 mL), DMF (10 mL) and propargyl bromide (10 mmol) were added activated zinc dust (15 mmol) portion-wise with stirring. The mixture was then stirred at room temperature. Upon completion, it was diluted with saturated aqueous  $\text{NH}_4\text{Cl}$  (15 mL) and the excess zinc was filtered. The filtrate was concentrated and to the residue was added water. The aqueous phase was extracted with EtOAc (15 mL  $\times$  3). The combined organic phases were dried with anhydrous  $\text{Na}_2\text{SO}_4$  and concentrated. The residue was purified by column chromatography on silica gel with petroleum ether-ethyl acetate (5:1) to give

2-(1-hydroxybut-3-ynyl) phenol (**I**, 98%).

## 2.2 Procedure for the synthesis of (E)-ethyl 3-(2-(1-hydroxybut-3-ynyl)phenoxy)acrylate (**II**)

To a flask containing 2-(1-hydroxybut-3-ynyl)phenol (**I**, 4 mmol) and ethyl propiolate (4.4 mmol) in CH<sub>2</sub>Cl<sub>2</sub> (20 mL) was added DABCO (0.4 mmol). The resulting mixture was stirred at 0 °C for 3 h. Upon completion, the mixture was concentrated and the residue was purified by column chromatography on silica gel with petroleum ether-ethyl acetate (10:1) to give (E)-ethyl 3-(2-(1-hydroxybut-3-ynyl)phenoxy)acrylate (**II**, 83%).

## 2.3 Procedure for the synthesis of (E)-ethyl 3-(2-buta-2,3-dienylphenoxy)acrylate (**1a**)

To a solution of (E)-ethyl 3-(2-(1-hydroxybut-3-ynyl)phenoxy)acrylate (**II**, 2 mmol) in acetone (20 mL) cooled to 0 °C was added Jones reagent (2.4 mmol) in a dropwise manner. Upon complete consumption of the starting material as monitored by TLC, the reaction mixture was quenched by addition of isopropanol. The mixture was filtered and the filtrate was concentrated under vacuum. The residue were purified by column chromatography on silica gel with petroleum ether-ethyl acetate (10:1) to give 1-(2-(allyloxy)phenyl)buta-2,3-dien-1-one (**1a**, 86%). **1b-1h**, **1r** were obtained in a similar manner.

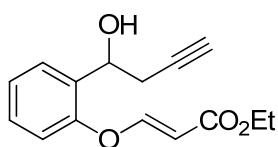

## (E)-Ethyl 3-(2-(1-hydroxybut-3-yn-1-yl)phenoxy)acrylate (**II**)

Eluent: petroleum ether-ethyl acetate (10:1); oil; <sup>1</sup>H NMR (400 MHz, CDCl<sub>3</sub>) δ: 1.22 (t, *J* = 7.6 Hz, 3H), 2.00 (t, *J* = 2.4 Hz, 1H), 2.50-2.56 (m, 1H), 2.60-2.66 (m, 1H), 3.27 (br s, 1H), 4.13 (q, *J* = 7.6 Hz, 2H), 5.08-5.11 (m, 1H), 5.49 (d, *J* = 12.4 Hz, 1H), 6.95 (d, *J* = 7.6 Hz, 1H), 7.17 (t, *J* = 7.6 Hz, 1H), 7.26 (t, *J* = 7.6 Hz, 1H), 7.55 (d, *J* = 7.6 Hz, 1H), 7.70 (d, *J* = 12.0 Hz, 1H). <sup>13</sup>C NMR (100 MHz, CDCl<sub>3</sub>) δ: 14.3, 28.1, 60.2, 66.4, 71.0, 80.5, 102.4, 117.6, 125.4, 127.4, 129.1, 133.2, 152.3,

159.2, 167.2. MS:  $m/z$  261 (MH)<sup>+</sup>. HRMS (ESI) calcd for C<sub>15</sub>H<sub>17</sub>O<sub>4</sub>: 261.1127 [M+H], found: 261.1135.

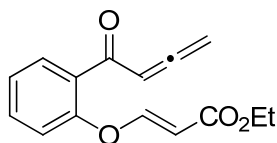

**(E)-Ethyl 3-(2-buta-2,3-dienoylphenoxy)acrylate (1a)**

Eluent: petroleum ether-ethyl acetate (10:1); oil; <sup>1</sup>H NMR (400 MHz, CDCl<sub>3</sub>)  $\delta$ : 1.21 (t,  $J$  = 7.2 Hz, 3H), 4.12 (q,  $J$  = 6.8 Hz, 2H), 5.11 (d,  $J$  = 6.4 Hz, 2H), 5.47 (d,  $J$  = 12.4 Hz, 1H), 6.18 (t,  $J$  = 6.4 Hz, 1H), 7.04 (d,  $J$  = 7.6 Hz, 1H), 7.19 (t,  $J$  = 6.8 Hz, 1H), 7.44-7.48 (m, 2H), 7.67 (d,  $J$  = 12.0 Hz, 1H). <sup>13</sup>C NMR (100 MHz, CDCl<sub>3</sub>)  $\delta$ : 14.3, 60.2, 79.7, 96.7, 103.0, 118.6, 125.1, 130.0, 130.6, 132.7, 153.0, 158.7, 166.8, 191.8, 218.0. HRMS (ESI) calcd for C<sub>15</sub>H<sub>15</sub>O<sub>4</sub>: 259.0970 [M+H], found: 259.0975.

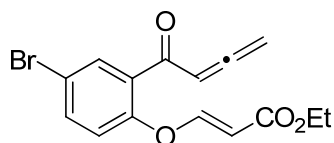

**(E)-Ethyl 3-(4-bromo-2-buta-2,3-dienoylphenoxy)acrylate (1b)**

Eluent: petroleum ether-ethyl acetate (10:1); oil; <sup>1</sup>H NMR (400 MHz, CDCl<sub>3</sub>)  $\delta$ : 1.26 (t,  $J$  = 7.2 Hz, 3H), 4.17 (q,  $J$  = 7.6 Hz, 2H), 5.19 (d,  $J$  = 6.4 Hz, 2H), 5.52 (d,  $J$  = 12.4 Hz, 1H), 6.20 (t,  $J$  = 6.4 Hz, 1H), 6.98 (d,  $J$  = 8.8 Hz, 1H), 7.56-7.61 (m, 2H), 7.65 (d,  $J$  = 12.4 Hz, 1H). <sup>13</sup>C NMR (100 MHz, CDCl<sub>3</sub>)  $\delta$ : 14.3, 60.4, 80.1, 96.6, 103.7, 117.9, 120.3, 132.1, 132.7, 135.3, 152.0, 158.1, 166.6, 190.4, 218.3. HRMS (ESI) calcd for C<sub>15</sub>H<sub>14</sub>BrO<sub>4</sub>: 337.0075 [M+H], found: 337.0085.

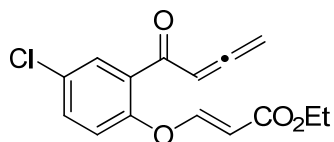

**(E)-Ethyl 3-(2-buta-2,3-dienoyl-4-chlorophenoxy)acrylate (1c)**

Eluent: petroleum ether-ethyl acetate (10:1); oil; <sup>1</sup>H NMR (400 MHz, CDCl<sub>3</sub>)  $\delta$ : 1.19 (t,  $J$  = 7.2 Hz,

3H), 4.10 (q,  $J = 7.2$  Hz, 2H), 5.13 (d,  $J = 6.4$  Hz, 2H), 5.45 (d,  $J = 12.4$  Hz, 1H), 6.14 (t,  $J = 6.4$  Hz, 1H), 6.99 (d,  $J = 9.2$  Hz, 1H), 7.36-7.40 (m, 2H), 7.60 (d,  $J = 12.4$  Hz, 1H).  $^{13}\text{C}$  NMR (100 MHz,  $\text{CDCl}_3$ )  $\delta$ : 14.2, 60.3, 80.0, 96.5, 103.5, 120.0, 129.7, 130.4, 131.8, 132.3, 151.4, 158.2, 166.5, 190.4, 218.3. HRMS (ESI) calcd for  $\text{C}_{15}\text{H}_{14}\text{ClO}_4$ : 293.0580  $[\text{M}+\text{H}]$ , found: 293.0588.

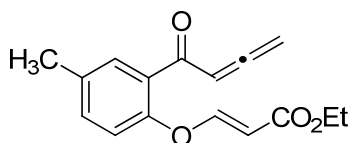

**(*E*)-Ethyl 3-(2-buta-2,3-dienoyl-4-methylphenoxy)acrylate (1d)**

Eluent: petroleum ether-ethyl acetate (10:1); oil;  $^1\text{H}$  NMR (400 MHz,  $\text{CDCl}_3$ )  $\delta$ : 1.20 (t,  $J = 7.2$  Hz, 3H), 2.29 (s, 3H), 4.11 (q,  $J = 6.8$  Hz, 2H), 5.11 (d,  $J = 6.4$  Hz, 2H), 5.41 (d,  $J = 12.0$  Hz, 1H), 6.18 (t,  $J = 6.4$  Hz, 1H), 6.92 (d,  $J = 8.4$  Hz, 1H), 7.21-7.24 (m, 2H), 7.64 (d,  $J = 12.0$  Hz, 1H).  $^{13}\text{C}$  NMR (100 MHz,  $\text{CDCl}_3$ )  $\delta$ : 14.2, 20.6, 60.1, 79.6, 96.6, 102.5, 118.7, 130.3, 130.4, 133.3, 135.0, 151.0, 159.2, 166.8, 191.8, 217.8. HRMS (ESI) calcd for  $\text{C}_{16}\text{H}_{17}\text{O}_4$ : 273.1127  $[\text{M}+\text{H}]$ , found: 273.1122.

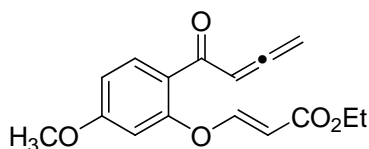

**(*E*)-Ethyl 3-(2-buta-2,3-dienoyl-5-methoxyphenoxy)acrylate (1e)**

Eluent: petroleum ether-ethyl acetate (10:1); oil;  $^1\text{H}$  NMR (400 MHz,  $\text{CDCl}_3$ )  $\delta$ : 1.22 (t,  $J = 6.8$  Hz, 3H), 3.80 (s, 3H), 4.10-4.15 (m, 2H), 5.14 (d,  $J = 6.0$  Hz, 2H), 5.49 (d,  $J = 12.4$  Hz, 1H), 6.27-6.30 (m, 1H), 6.53 (s, 1H), 6.72 (d,  $J = 8.4$  Hz, 1H), 7.57 (d,  $J = 9.2$  Hz, 1H), 7.66 (d,  $J = 12.0$  Hz, 1H).  $^{13}\text{C}$  NMR (100 MHz,  $\text{CDCl}_3$ )  $\delta$ : 14.3, 55.8, 60.2, 79.4, 96.2, 103.2, 104.8, 110.4, 122.9, 132.3, 155.2, 158.5, 163.6, 166.8, 189.7, 217.1. HRMS (ESI) calcd for  $\text{C}_{16}\text{H}_{17}\text{O}_5$ : 289.1076  $[\text{M}+\text{H}]$ , found: 289.1088.

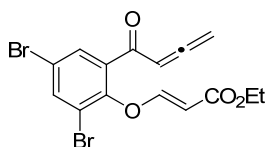

**(E)-Ethyl 3-(2,4-dibromo-6-buta-2,3-dienoylphenoxy)acrylate (1f)**

Eluent: petroleum ether-ethyl acetate (10:1); oil;  $^1\text{H}$  NMR (400 MHz,  $\text{CDCl}_3$ )  $\delta$ : 1.24 (t,  $J = 6.8$  Hz, 3H), 4.14 (q,  $J = 7.2$  Hz, 2H), 5.14 (d,  $J = 11.6$  Hz, 1H), 5.24 (d,  $J = 6.0$  Hz, 2H), 6.15 (t,  $J = 6.4$  Hz, 1H), 7.52-7.55 (m, 2H), 7.85 (s, 1H).  $^{13}\text{C}$  NMR (100 MHz,  $\text{CDCl}_3$ )  $\delta$ : 14.2, 60.3, 80.6, 96.3, 101.9, 117.8, 119.4, 131.5, 135.0, 138.3, 148.0, 159.5, 166.4, 189.4, 218.8. HRMS (ESI) calcd for  $\text{C}_{15}\text{H}_{13}\text{Br}_2\text{O}_4$ : 414.9180  $[\text{M}+\text{H}]$ , found: 414.9189.

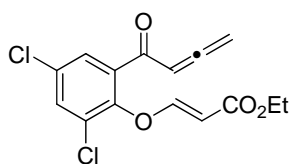

**(E)-Ethyl 3-(2-buta-2,3-dienoyl-4,6-dichlorophenoxy)acrylate (1g)**

Eluent: petroleum ether-ethyl acetate (10:1); oil;  $^1\text{H}$  NMR (400 MHz,  $\text{CDCl}_3$ )  $\delta$ : 1.22 (t,  $J = 6.8$  Hz, 3H), 4.11 (q,  $J = 6.8$  Hz, 2H), 5.14 (d,  $J = 12.4$  Hz, 1H), 5.22 (d,  $J = 6.4$  Hz, 2H), 6.12-6.15 (m, 1H), 7.34 (s, 1H), 7.52-7.54 (m, 2H).  $^{13}\text{C}$  NMR (100 MHz,  $\text{CDCl}_3$ )  $\delta$ : 14.2, 60.3, 80.6, 96.3, 101.7, 127.9, 128.5, 131.8, 132.6, 134.7, 146.4, 159.6, 166.3, 189.5, 218.7. HRMS (ESI) calcd for  $\text{C}_{15}\text{H}_{13}\text{Cl}_2\text{O}_4$ : 327.0191  $[\text{M}+\text{H}]$ , found: 327.0198.

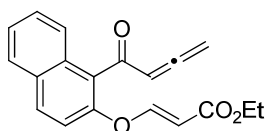

**(E)-Ethyl 3-(1-buta-2,3-dienoylnaphthalen-2-yloxy)acrylate (1h)**

Eluent: petroleum ether-ethyl acetate (10:1); oil;  $^1\text{H}$  NMR (400 MHz,  $\text{CDCl}_3$ )  $\delta$ : 1.22 (t,  $J = 7.2$  Hz, 3H), 4.14 (q,  $J = 6.8$  Hz, 2H), 4.91 (d,  $J = 6.4$  Hz, 2H), 5.50 (d,  $J = 12.0$  Hz, 1H), 6.23 (t,  $J = 6.4$  Hz, 1H), 7.19 (d,  $J = 8.8$  Hz, 1H), 7.41-7.49 (m, 2H), 7.71-7.80 (m, 3H), 7.86 (d,  $J = 8.8$  Hz, 1H).  $^{13}\text{C}$  NMR (100 MHz,  $\text{CDCl}_3$ )  $\delta$ : 14.3, 60.2, 79.9, 98.7, 102.8, 117.6, 124.6, 126.0, 126.8, 127.9, 128.3, 130.8, 130.9, 131.8, 149.1, 159.2, 166.9, 194.7, 219.0. HRMS (ESI) calcd for  $\text{C}_{19}\text{H}_{17}\text{O}_4$ : 309.1127  $[\text{M}+\text{H}]$ , found: 309.1119.

**3. Synthetic procedure for the synthesis of ethyl 3-(2-(4-(3,5-dimethoxyphenyl)buta-**

## 2,3-dienoyl)phenoxy)acrylate (1j)

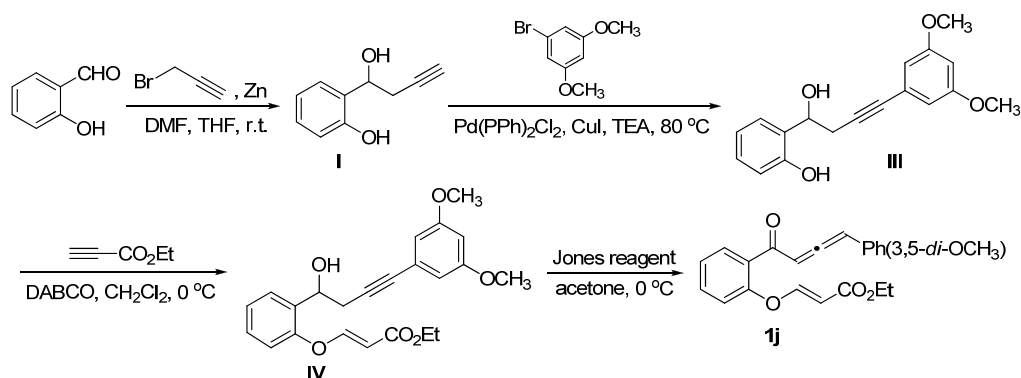

### 3.1 Procedure for the synthesis of 2-(1-hydroxybut-3-ynyl)phenol (I)

To a flask containing 2-hydroxybenzaldehyde (5 mmol), THF (10 mL), DMF (10 mL) and propargyl bromide (10 mmol) were added activated zinc dust (15 mmol) portion-wise with stirring. The mixture was then stirred at room temperature. Upon completion, it was diluted with saturated aqueous  $\text{NH}_4\text{Cl}$  (15 mL) and the excess zinc was filtered. The filtrate was concentrated and to the residue was added water. The aqueous phase was extracted with EtOAc (15 mL  $\times$  3). The combined organic phases were dried with anhydrous  $\text{Na}_2\text{SO}_4$  and concentrated. The residue was purified by column chromatography on silica gel with petroleum ether-ethyl acetate (5:1) to give 2-(1-hydroxybut-3-ynyl) phenol (**I**, 98%).

### 3.2 Procedure for the synthesis of 2-(4-(3,5-dimethoxyphenyl)-1-hydroxybut-3-ynyl)phenol (III)

To a flask containing 2-(1-hydroxybut-3-ynyl)phenol (**I**, 4 mmol) and 1-bromo-3,5-dimethoxy benzene (1.2 mmol) in  $\text{Et}_3\text{N}$  (16 mL) were added  $\text{Pd(PPh)}_3\text{Cl}_2$  (0.08 mmol) and CuI (0.04 mmol). After the mixture was stirred at  $50^\circ\text{C}$  under  $\text{N}_2$  atmosphere for 2 h, the reaction was quenched with aqueous  $\text{NH}_4\text{Cl}$  and extracted with ethyl acetate (15 mL  $\times$  3). The combined organic layers were washed with water and brine and then dried over anhydrous  $\text{Na}_2\text{SO}_4$ . The solvent was evaporated under vacuum, and the crude product was purified by chromatography on silica gel by using petroleum ether-ethyl acetate (5:1) as the eluent to afford 2-(4-(3,5-dimethoxyphenyl)-1-hydroxy

but-3-ynyl)phenol (**III**, 78%).

### 3.3 Procedure for the synthesis of ethyl 3-(2-(4-(3,5-dimethoxyphenyl)-1-hydroxybut-3-ynyl)phenoxy)acrylate (**IV**)

To a flask containing 2-(4-(3,5-dimethoxyphenyl)-1-hydroxybut-3-ynyl)phenol (**III**, 3 mmol), ethyl propiolate (3.3 mmol) in CH<sub>2</sub>Cl<sub>2</sub> (15 mL) was added DABCO (0.3 mmol). The resulting mixture was stirred at 0 °C for 3 h. Upon completion, the mixture was concentrated and the residue was purified by column chromatography on silica gel with petroleum ether-ethyl acetate (5:1) to give (E)- 3-(2-(4-(3,5-dimethoxyphenyl)-1-hydroxybut-3-ynyl)phenoxy)acrylate (**IV**, 85%).

### 3.4 Procedure for the synthesis of ethyl 3-(2-(4-(3,5-dimethoxyphenyl)buta-2,3-dienoyl)phenoxy)acrylate (**1j**)

To a solution of (E)-ethyl 3-(2-(4-(3,5-dimethoxyphenyl)-1-hydroxybut-3-ynyl)phenoxy)acrylate (**IV**, 2 mmol) in acetone (20 mL) cooled to 0 °C was added Jones reagent (2.4 mmol) in a dropwise manner. Upon complete consumption of the starting material as monitored by TLC, the reaction mixture was quenched by addition of isopropanol. The mixture was filtered and the filtrate was concentrated under vacuum. The residue were purified by column chromatography on silica gel with petroleum ether-ethyl acetate (5:1) to give (E)-ethyl 3-(2-(4-(3,5-dimethoxyphenyl)buta-2,3-dienoyl)phenoxy)acrylate (**1j**, 78%). **1i** and **1k-1q** were obtained in a similar manner.

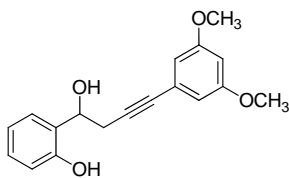

### 2-(4-(3,5-Dimethoxyphenyl)-1-hydroxybut-3-yn-1-yl)phenol (**III**)

Eluent: petroleum ether-ethyl acetate (5:1); oil; <sup>1</sup>H NMR (400 MHz, CDCl<sub>3</sub>) δ: 2.86-3.00 (m, 2H), 3.73 (s, 6H), 5.07 (q, *J* = 7.2 Hz, 1H), 6.42 (t, *J* = 2.4 Hz, 1H), 6.57 (d, *J* = 2.8 Hz, 2H), 6.86 (t, *J* = 7.2 Hz, 2H), 7.09 (d, *J* = 7.2 Hz, 1H), 7.14-7.18 (m, 1H), 8.16 (br s, 1H). <sup>13</sup>C NMR (100 MHz,

CDCl<sub>3</sub>)  $\delta$ : 28.8, 55.4, 73.3, 83.2, 85.7, 101.5, 109.6, 117.0, 120.0, 124.6, 126.2, 127.5, 129.2, 155.0, 160.4. MS:  $m/z$  299 (MH)<sup>+</sup>. HRMS (ESI) calcd for C<sub>18</sub>H<sub>19</sub>O<sub>4</sub>: 299.1283 [M+H], found: 299.1285.

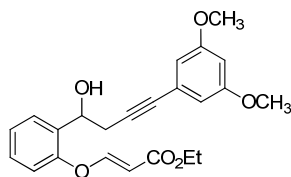

**(E)-Ethyl 3-(2-(4-(3,5-dimethoxyphenyl)-1-hydroxybut-3-yn-1-yl)phenoxy)acrylate (IV)**

Eluent: petroleum ether-ethyl acetate (5:1); oil; <sup>1</sup>H NMR (400 MHz, CDCl<sub>3</sub>)  $\delta$ : 1.26 (t,  $J$  = 7.2 Hz, 3H), 2.75-2.81 (m, 1H), 2.88-2.93 (m, 1H), 3.75 (s, 6H), 4.17 (q,  $J$  = 7.2 Hz, 2H), 5.21 (dd,  $J_1$  = 7.2 Hz,  $J_2$  = 4.8 Hz, 1H), 5.54 (d,  $J$  = 12.0 Hz, 1H), 6.40-6.41 (m, 1H), 6.52-6.53 (m, 2H), 7.02 (d,  $J$  = 7.6 Hz, 1H), 7.24 (t,  $J$  = 7.2 Hz, 1H), 7.30-7.34 (m, 1H), 7.64 (d,  $J$  = 8.0 Hz, 1H), 7.77 (d,  $J$  = 12.0 Hz, 1H). <sup>13</sup>C NMR (100 MHz, CDCl<sub>3</sub>)  $\delta$ : 14.3, 29.3, 55.4, 60.2, 66.9, 83.3, 85.3, 101.5, 102.6, 109.5, 117.7, 124.3, 125.4, 127.4, 129.2, 133.1, 152.4, 159.0, 160.4, 167.0. MS:  $m/z$  397 (MH)<sup>+</sup>. HRMS (ESI) calcd for C<sub>23</sub>H<sub>25</sub>O<sub>6</sub>: 397.1651 [M+H], found: 397.1655.

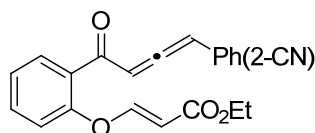

**(E)-Ethyl 3-(2-(4-(2-cyanophenyl)buta-2,3-dienoyl)phenoxy)acrylate (1i)**

Eluent: petroleum ether-ethyl acetate (10:1); oil; <sup>1</sup>H NMR (400 MHz, CDCl<sub>3</sub>)  $\delta$ : 1.25 (t,  $J$  = 7.2 Hz, 3H), 4.16 (q,  $J$  = 7.2 Hz, 2H), 5.51 (d,  $J$  = 12.4 Hz, 1H), 6.75 (d,  $J$  = 6.4 Hz, 1H), 6.94 (d,  $J$  = 6.0 Hz, 1H), 7.07 (d,  $J$  = 7.2 Hz, 1H), 7.19-7.23 (m, 1H), 7.30-7.34 (m, 1H), 7.43-7.54 (m, 3H), 7.55-7.61 (m, 2H), 7.79 (d,  $J$  = 12.4 Hz, 1H). <sup>13</sup>C NMR (100 MHz, CDCl<sub>3</sub>)  $\delta$ : 14.3, 60.4, 96.3, 100.8, 104.0, 111.0, 117.0, 120.2, 128.0, 128.6, 129.8, 130.6, 131.5, 132.9, 133.1, 133.3, 134.1, 151.6, 158.0, 166.4, 188.6, 217.5. MS:  $m/z$  360 (MH)<sup>+</sup>. HRMS (ESI) calcd for C<sub>22</sub>H<sub>18</sub>NO<sub>4</sub>: 360.1236 [M+H], found: 360.1237.

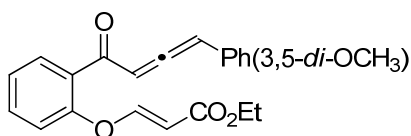

**(E)-Ethyl 3-(2-(4-(3,5-dimethoxyphenyl)buta-2,3-dienoyl)phenoxy)acrylate (1j)**

Eluent: petroleum ether-ethyl acetate (5:1); oil;  $^1\text{H}$  NMR (400 MHz,  $\text{CDCl}_3$ )  $\delta$ : 1.27 (t,  $J = 7.2$  Hz, 3H), 3.75 (s, 6H), 4.18 (q,  $J = 7.2$  Hz, 2H), 5.53 (d,  $J = 12.4$  Hz, 1H), 6.36-6.37 (m, 3H), 6.48 (d,  $J = 6.0$  Hz, 1H), 6.59 (d,  $J = 6.8$  Hz, 1H), 7.06 (d,  $J = 8.0$  Hz, 1H), 7.17 (t,  $J = 7.2$  Hz, 1H), 7.42-7.46 (m, 1H), 7.50-7.52 (m, 1H), 7.69 (d,  $J = 12.0$  Hz, 1H).  $^{13}\text{C}$  NMR (100 MHz,  $\text{CDCl}_3$ )  $\delta$ : 14.3, 55.3, 60.2, 99.1, 100.4, 100.6, 103.2, 105.6, 109.5, 118.7, 125.0, 129.7, 130.8, 132.6, 132.7, 153.0, 158.7, 161.0, 166.8, 191.4, 217.2. MS:  $m/z$  395 ( $\text{MH}^+$ ). HRMS (ESI) calcd for  $\text{C}_{23}\text{H}_{23}\text{O}_6$ : 395.1494 [ $\text{M}+\text{H}$ ], found: 395.1489.

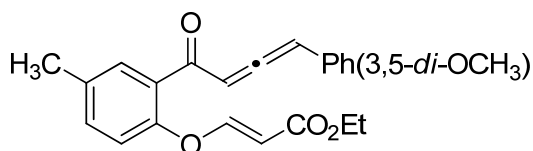

**(E)-Ethyl 3-(2-(4-(3,5-dimethoxyphenyl)buta-2,3-dienoyl)-4-methylphenoxy)acrylate (1l)**

Eluent: petroleum ether-ethyl acetate (10:1); oil;  $^1\text{H}$  NMR (400 MHz,  $\text{CDCl}_3$ )  $\delta$ : 1.27 (t,  $J = 7.6$  Hz, 3H), 2.23 (s, 3H), 3.77 (s, 6H), 4.17 (q,  $J = 7.6$  Hz, 2H), 5.47 (d,  $J = 12.4$  Hz, 1H), 6.37-6.40 (m, 3H), 6.48 (d,  $J = 6.0$  Hz, 1H), 6.57 (d,  $J = 6.0$  Hz, 1H), 6.94 (d,  $J = 8.4$  Hz, 1H), 7.21-7.31 (m, 2H), 7.68 (d,  $J = 12.4$  Hz, 1H).  $^{13}\text{C}$  NMR (100 MHz,  $\text{CDCl}_3$ )  $\delta$ : 14.2, 22.6, 55.4, 60.2, 99.0, 100.3, 100.5, 102.6, 105.5, 118.8, 130.2, 130.3, 132.7, 133.2, 134.8, 150.9, 159.3, 161.0, 166.9, 191.4, 217.2. MS:  $m/z$  409 ( $\text{MH}^+$ ). HRMS (ESI) calcd for  $\text{C}_{24}\text{H}_{25}\text{O}_6$ : 409.1651 [ $\text{M}+\text{H}$ ], found: 409.1655.

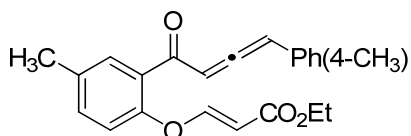

**(E)-Ethyl 3-(4-methyl-2-(4-(p-tolyl)buta-2,3-dienoyl)phenoxy)acrylate (1m)**

Eluent: petroleum ether-ethyl acetate (10:1); oil;  $^1\text{H}$  NMR (400 MHz,  $\text{CDCl}_3$ )  $\delta$ : 1.28 (t,  $J = 7.2$  Hz,

3H), 2.13 (s, 3H), 2.33 (s, 3H), 4.19 (q,  $J = 7.2$  Hz, 2H), 5.45 (d,  $J = 12.8$  Hz, 1H), 6.55 (dd,  $J_1 = 13.2$  Hz,  $J_2 = 6.0$  Hz, 1H), , 6.93 (d,  $J = 8.0$  Hz, 1H), 7.71-7.26 (m, 6H), 7.30 (s, 1H), 7.68 (d,  $J = 12.0$  Hz, 1H).  $^{13}\text{C}$  NMR (100 MHz,  $\text{CDCl}_3$ )  $\delta$ : 14.3, 20.4, 21.2, 60.1, 98.6, 100.5, 102.4, 118.8, 127.4, 127.7, 129.6, 130.2, 130.5, 133.2, 134.8, 138.2, 150.8, 159.4, 166.9, 191.6, 217.2. MS:  $m/z$  363 ( $\text{MH}^+$ ). HRMS (ESI) calcd for  $\text{C}_{23}\text{H}_{23}\text{O}_4$ : 363.1596 [ $\text{M}+\text{H}$ ], found: 363.1593.

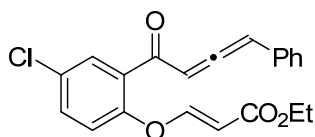

**(E)-Ethyl 3-(4-chloro-2-(4-phenylbuta-2,3-dienoyl)phenoxy)acrylate (1q)**

Eluent: petroleum ether-ethyl acetate (10:1); oil;  $^1\text{H}$  NMR (400 MHz,  $\text{CDCl}_3$ )  $\delta$ : 1.28 (t,  $J = 7.6$  Hz, 3H), 4.19 (q,  $J = 7.6$  Hz, 2H), 5.53 (d,  $J = 12.4$  Hz, 1H), 6.58 (dd,  $J_1 = 10.4$  Hz,  $J_2 = 6.0$  Hz, 1H), 6.99 (d,  $J = 8.4$  Hz, 1H), 7.22-7.31 (m, 7H), 7.47 (d,  $J = 2.4$  Hz, 1H), 7.63 (d,  $J = 12.4$  Hz, 1H).  $^{13}\text{C}$  NMR (100 MHz,  $\text{CDCl}_3$ )  $\delta$ : 14.3, 60.4, 99.3, 100.4, 103.7, 120.1, 127.6, 128.4, 129.0, 129.6, 130.3, 130.4, 132.0, 132.4, 151.4, 158.3, 166.6, 190.1, 217.6. MS:  $m/z$  369 ( $\text{MH}^+$ ). HRMS (ESI) calcd for  $\text{C}_{21}\text{H}_{18}\text{ClO}_4$ : 369.0893 [ $\text{M}+\text{H}$ ], found: 369.0892.

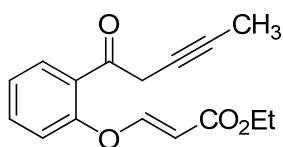

**(E)-Ethyl 3-(2-pent-3-ynoylphenoxy)acrylate (1r)**

Eluent: petroleum ether-ethyl acetate (10:1); oil;  $^1\text{H}$  NMR (400 MHz,  $\text{CDCl}_3$ )  $\delta$ : 1.20 (t,  $J = 7.2$  Hz, 3H), 1.71 (t,  $J = 2.4$  Hz, 3H), 3.69 (t,  $J = 2.4$  Hz, 2H), 4.11 (q,  $J = 7.2$  Hz, 2H), 5.58 (d,  $J = 12.4$  Hz, 1H), 7.03 (d,  $J = 8.4$  Hz, 1H), 7.20 (t,  $J = 8.0$  Hz, 1H), 7.46-7.50 (m, 1H), 7.67 (d,  $J = 12.0$  Hz, 1H), 7.73 (q,  $J = 7.6$  Hz, 1H).  $^{13}\text{C}$  NMR (100 MHz,  $\text{CDCl}_3$ )  $\delta$ : 3.56, 14.2, 35.1, 60.3, 71.3, 80.7, 103.8, 118.5, 125.3, 128.3, 131.0, 134.2, 154.4, 158.0, 166.6, 194.4. MS:  $m/z$  273 ( $\text{MH}^+$ ). HRMS (ESI) calcd for  $\text{C}_{16}\text{H}_{17}\text{O}_4$ : 273.1127 [ $\text{M}+\text{H}$ ], found: 273.1122.

## II. Copies of $^1\text{H}$ and $^{13}\text{C}$ NMR spectra of compounds II, III, IV

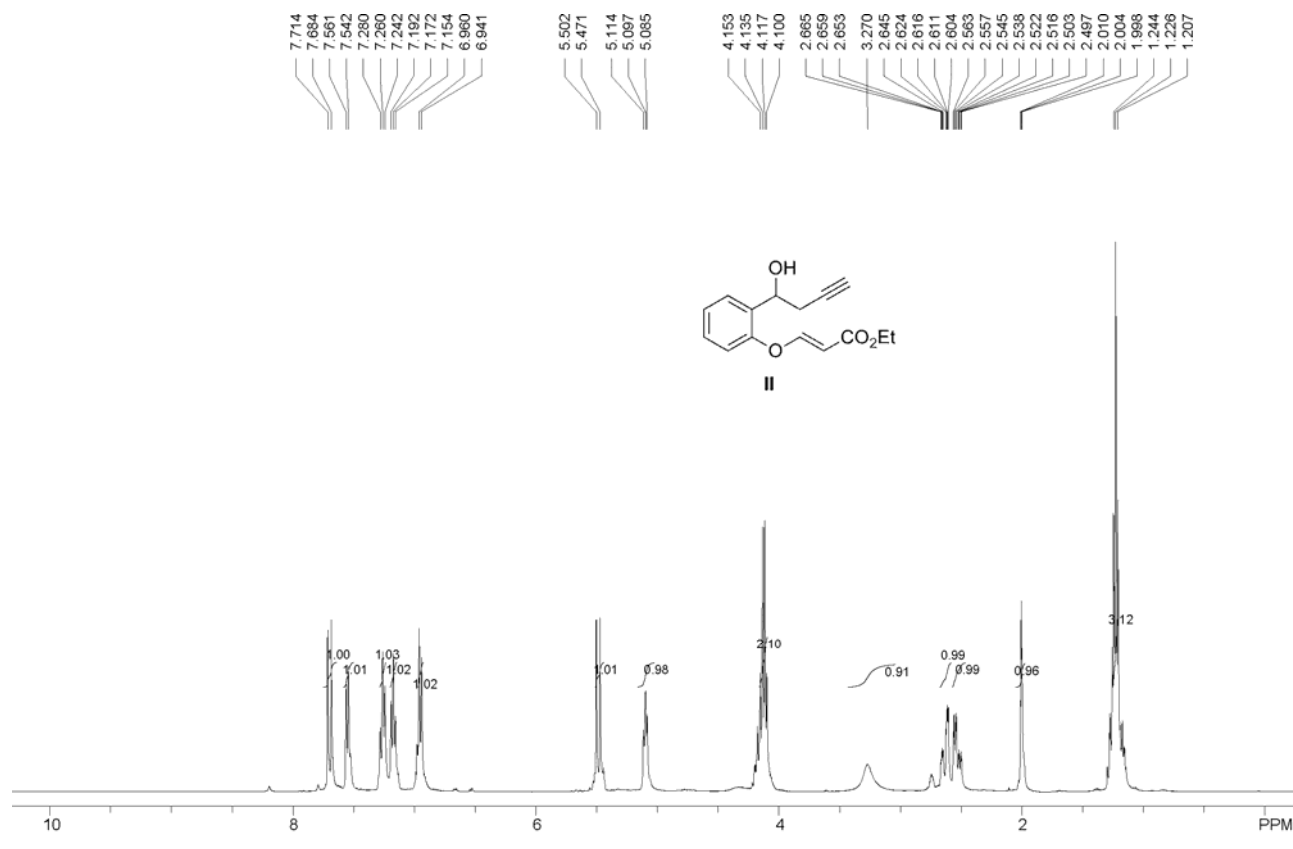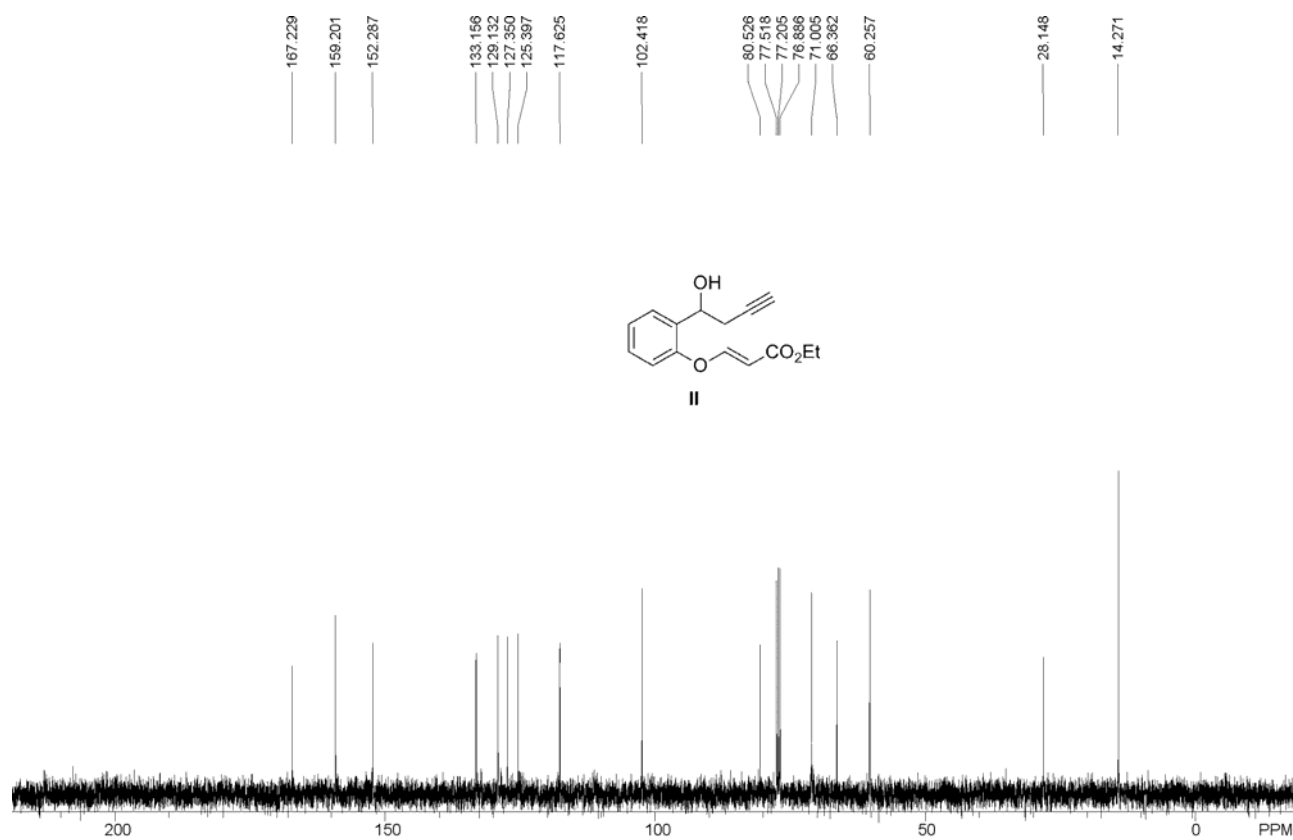

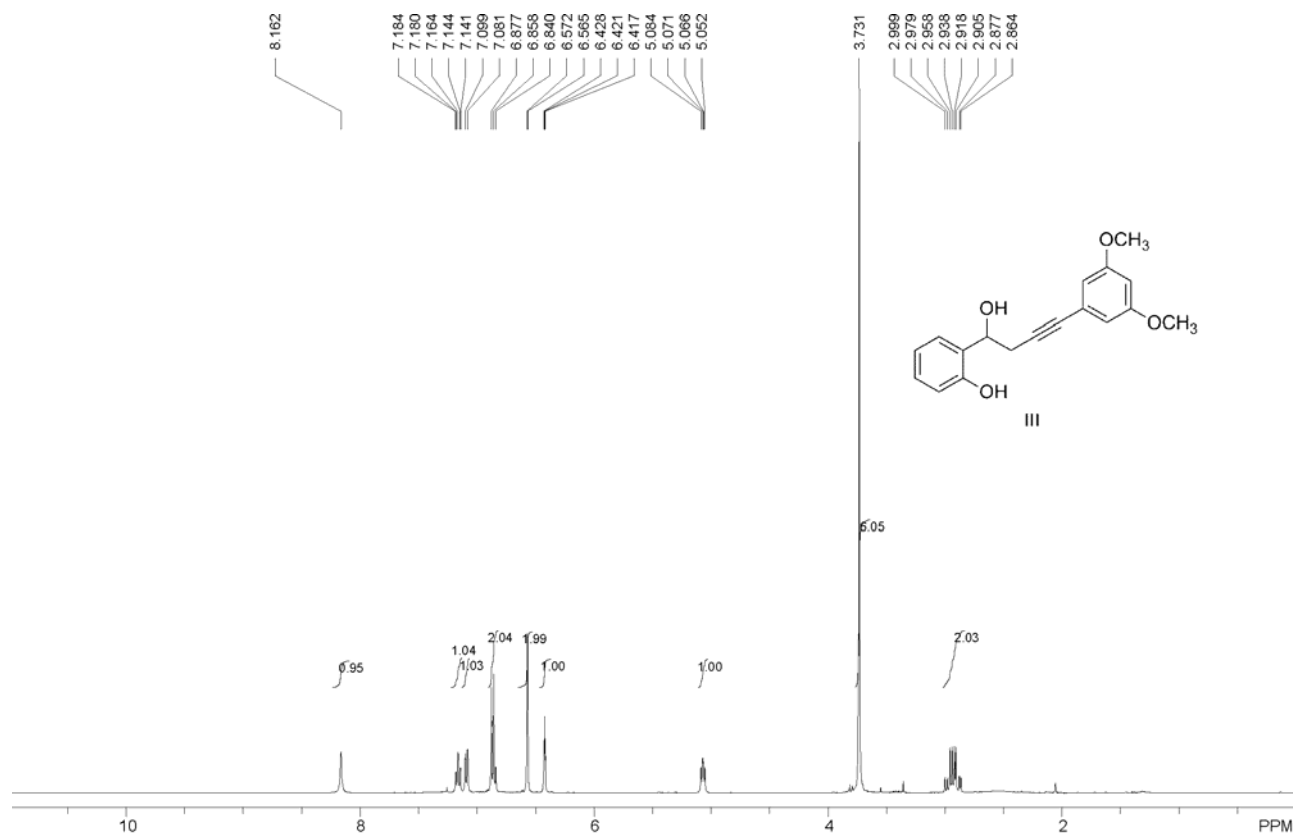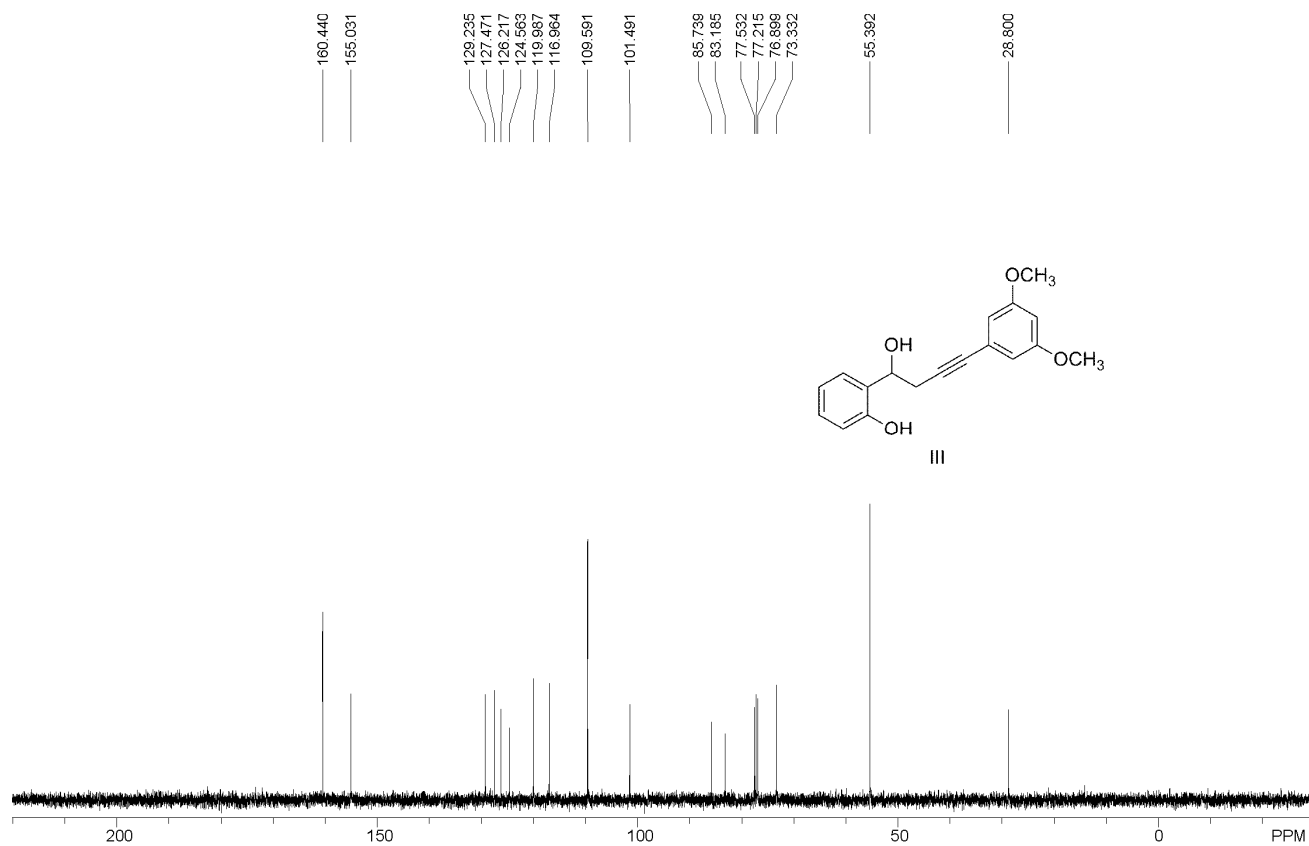

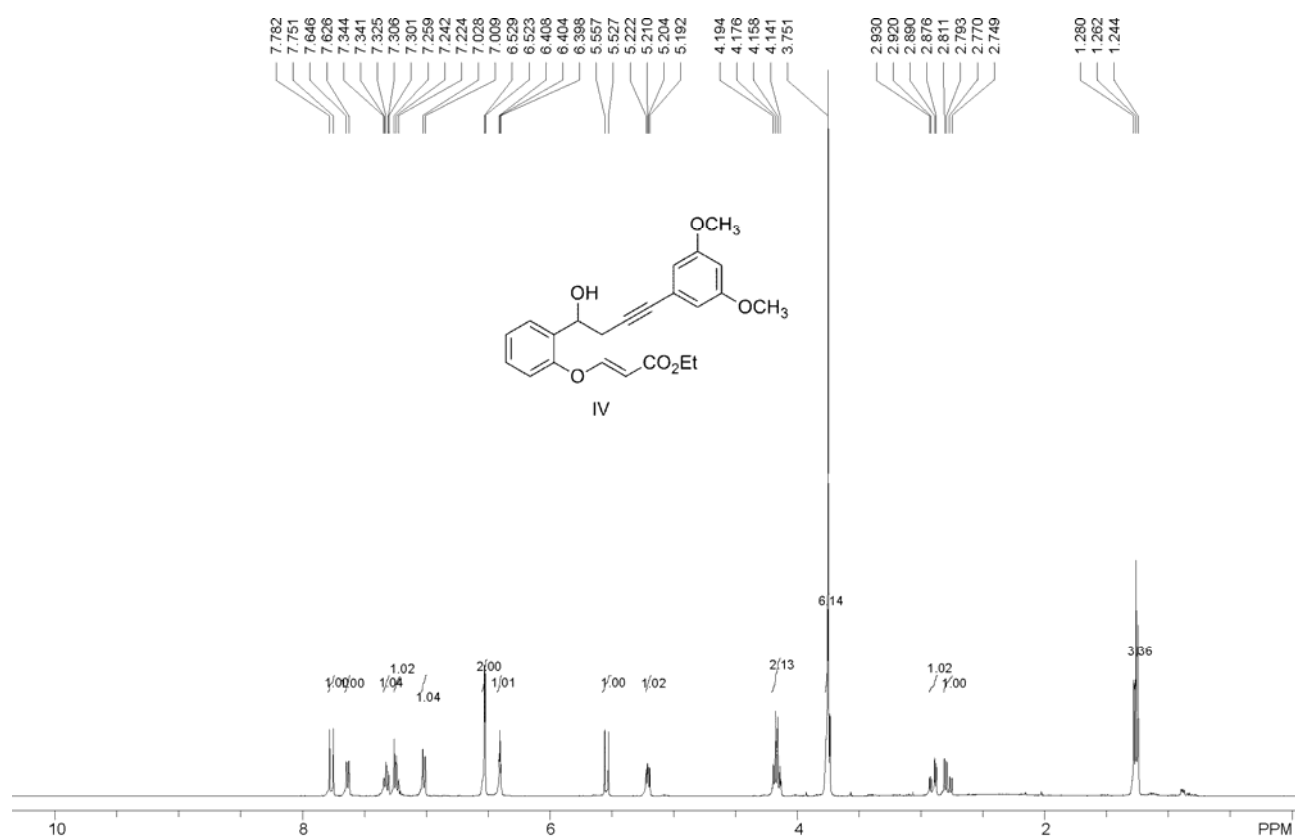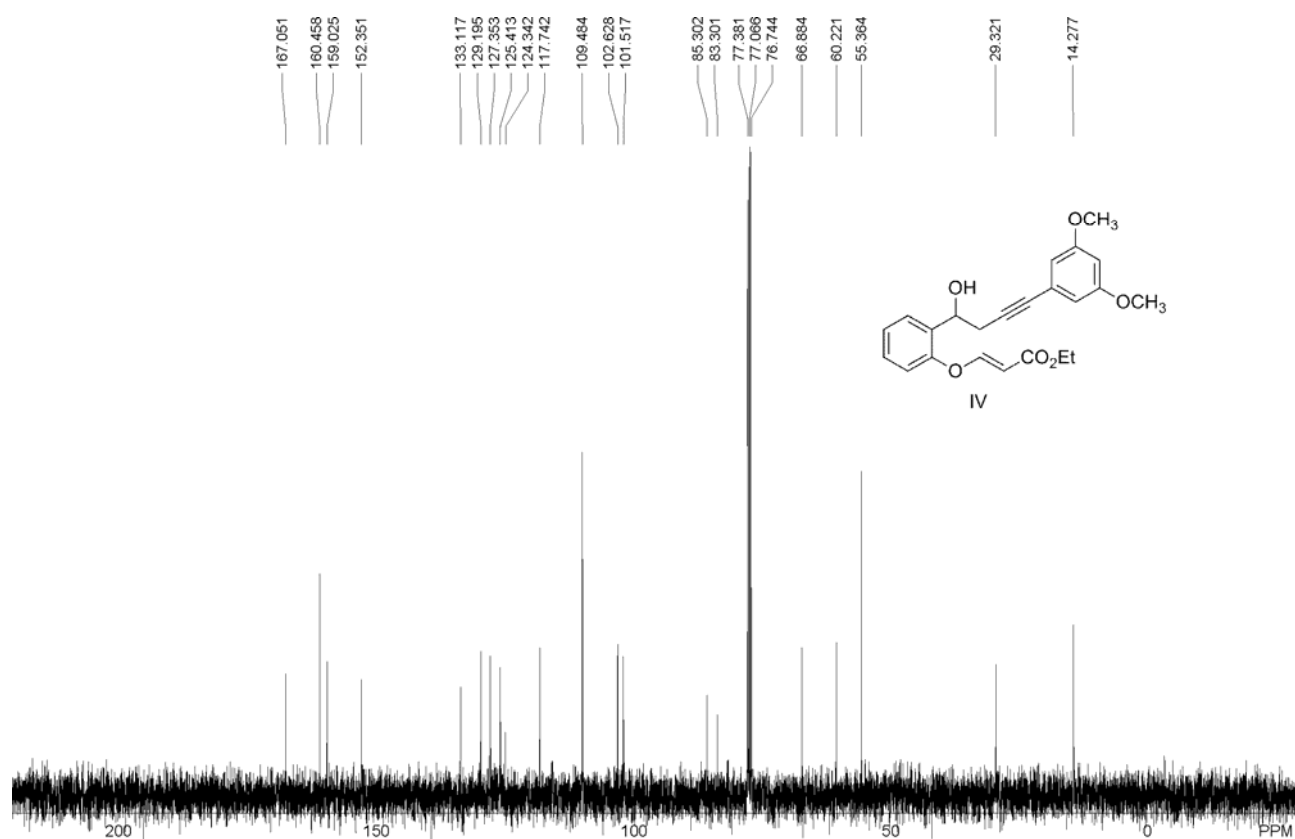

### III. Copies of $^1\text{H}$ and $^{13}\text{C}$ NMR spectra of compounds 1a-1j, 1l-1m, 1q-1r

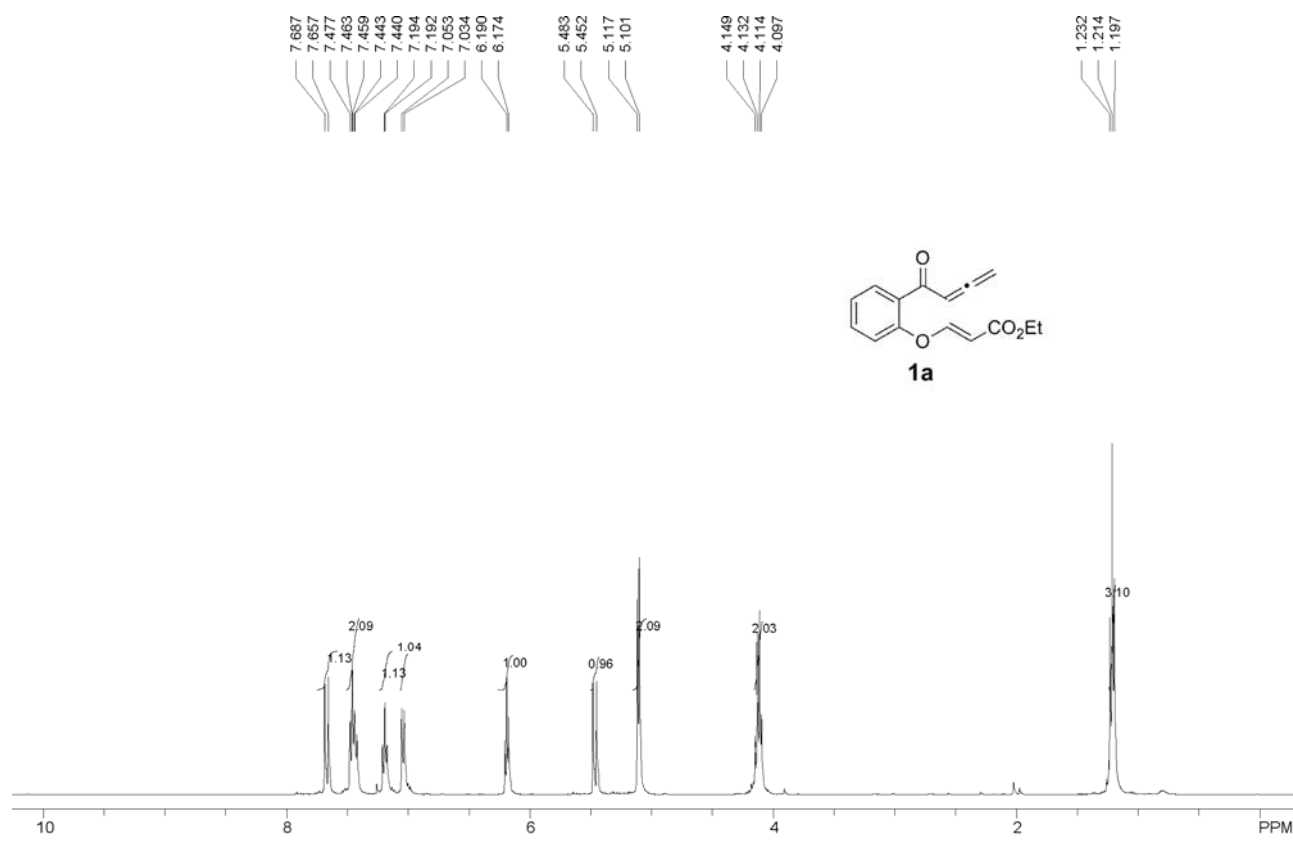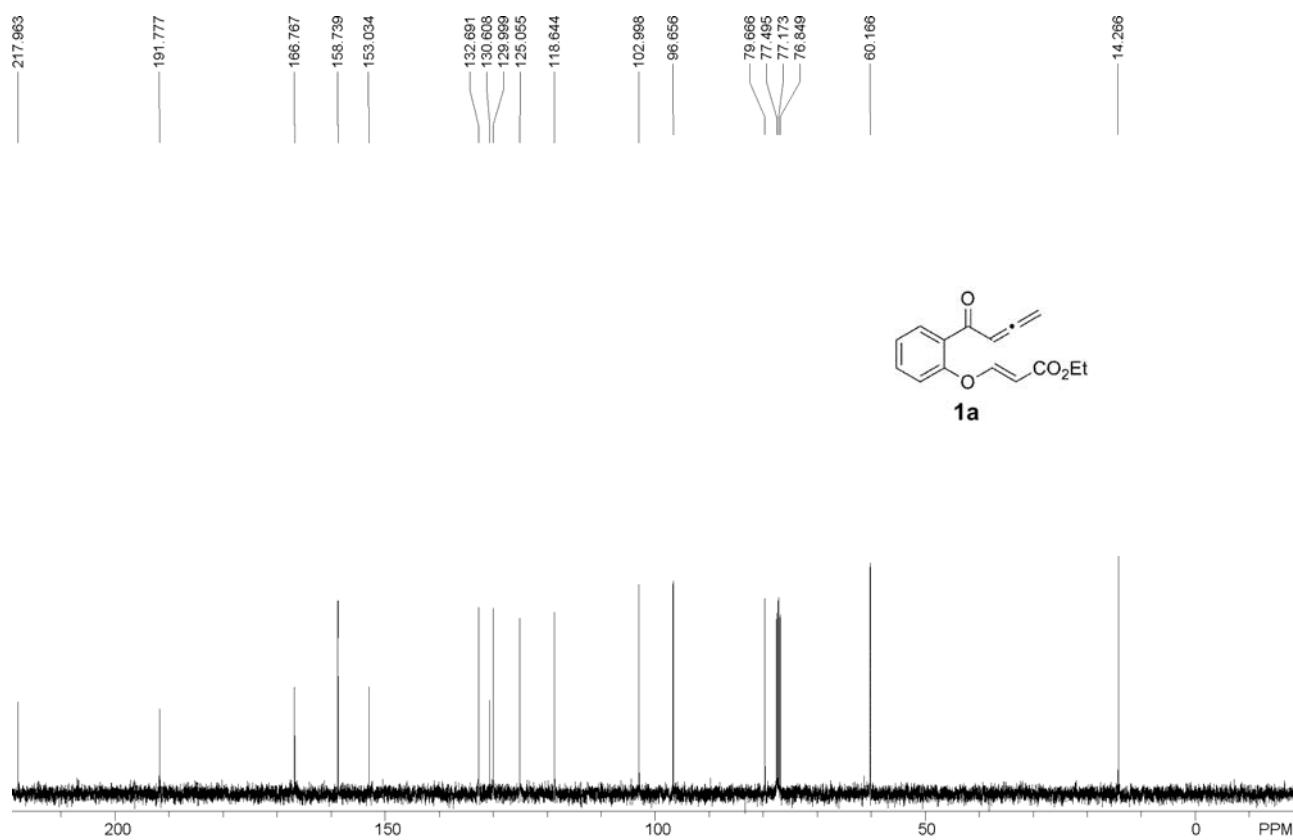

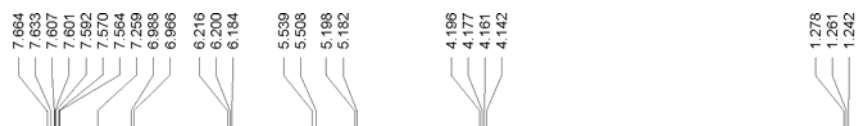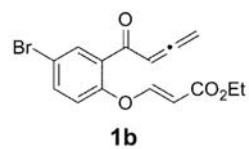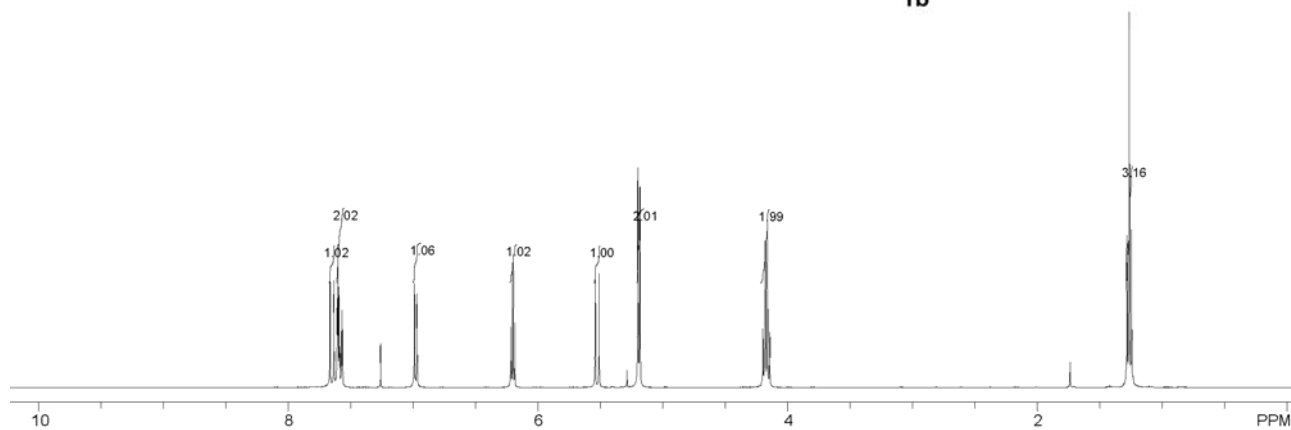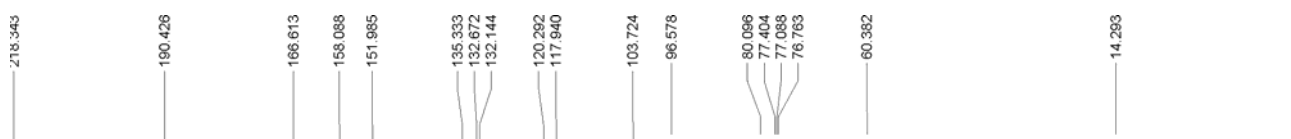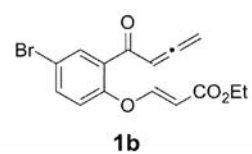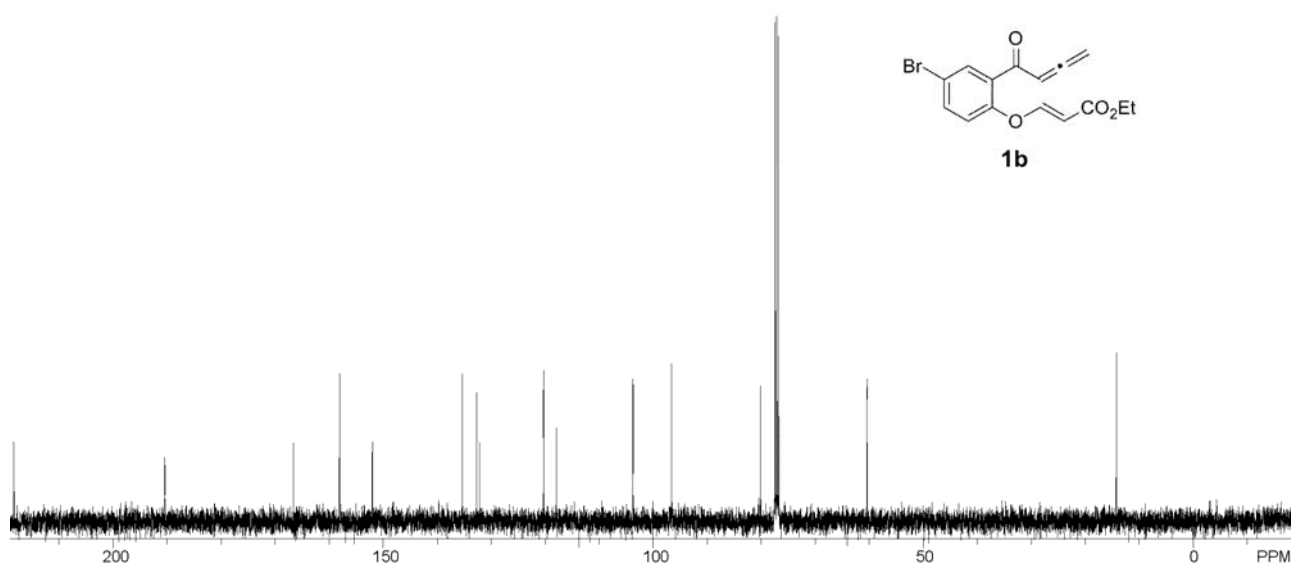

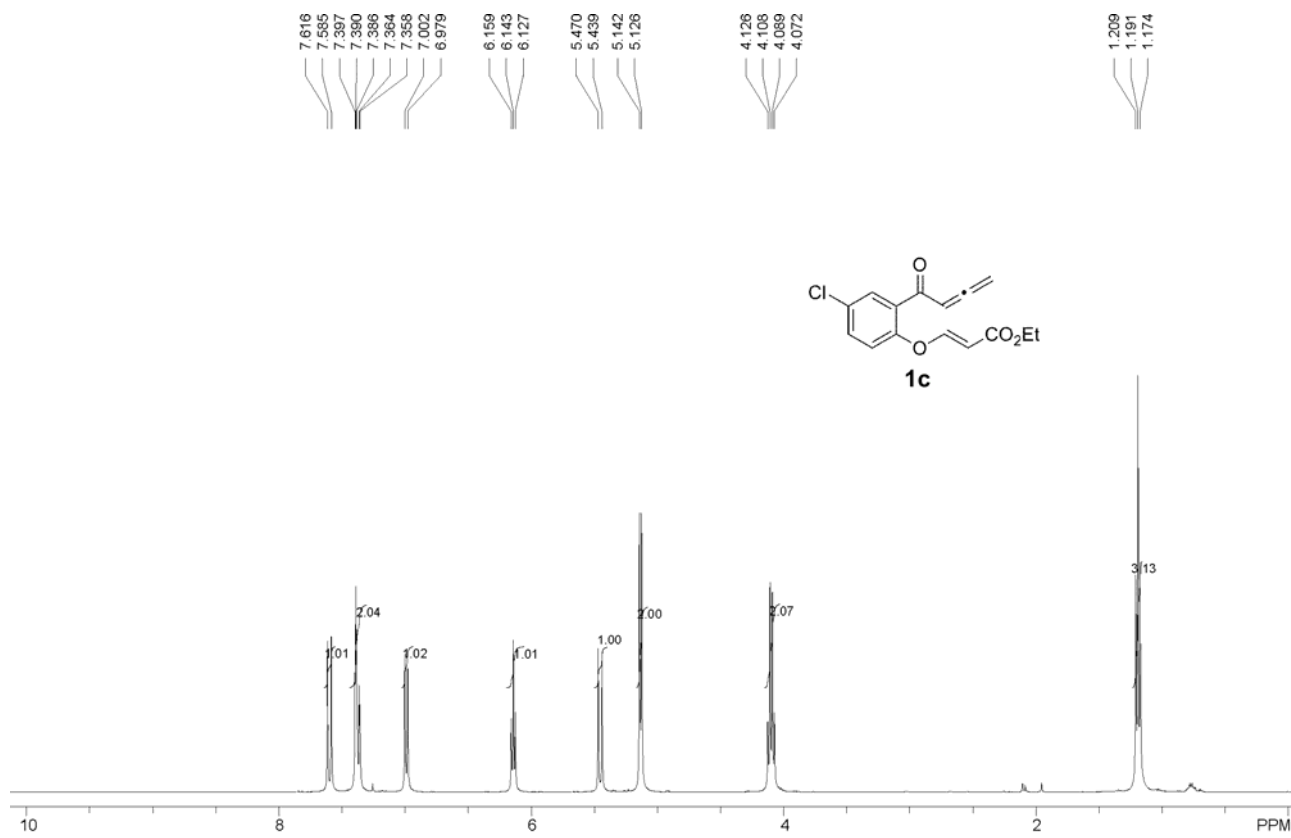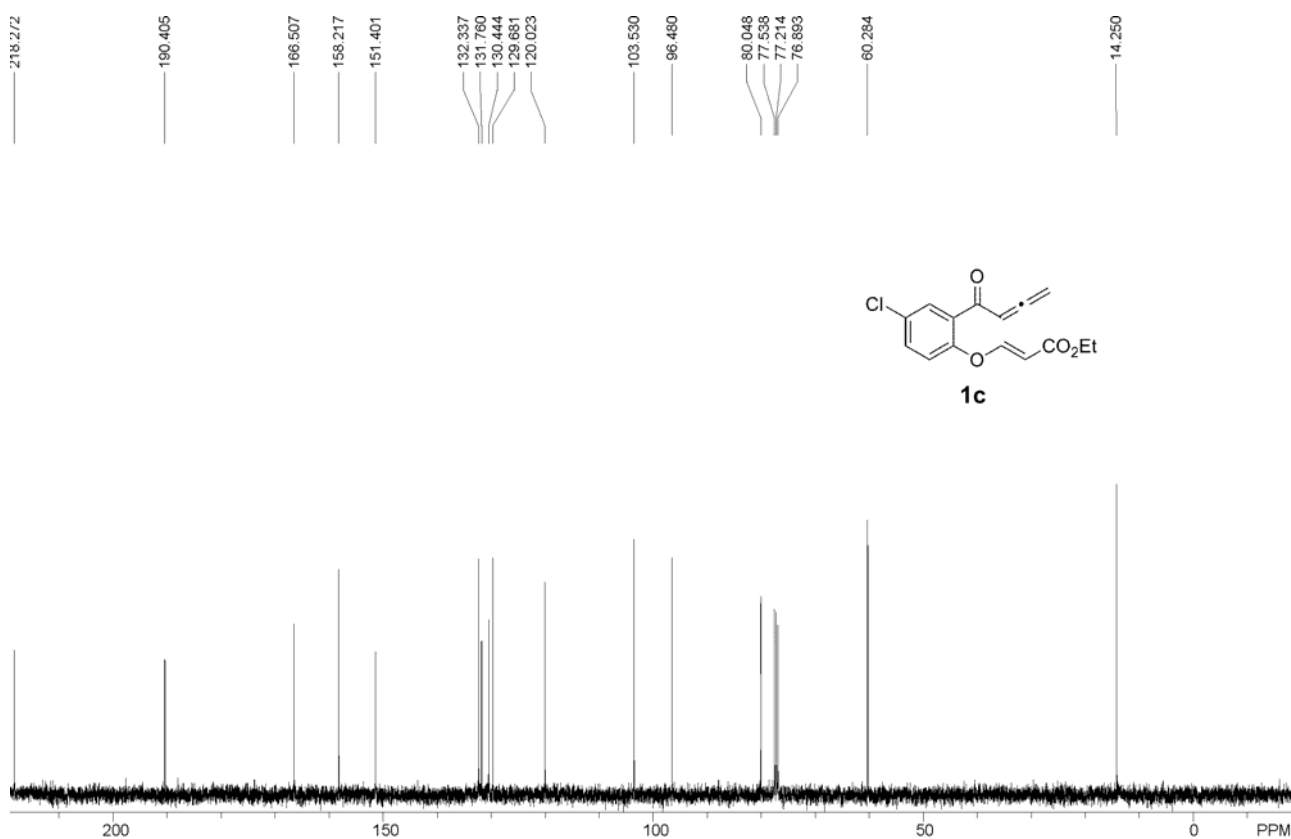

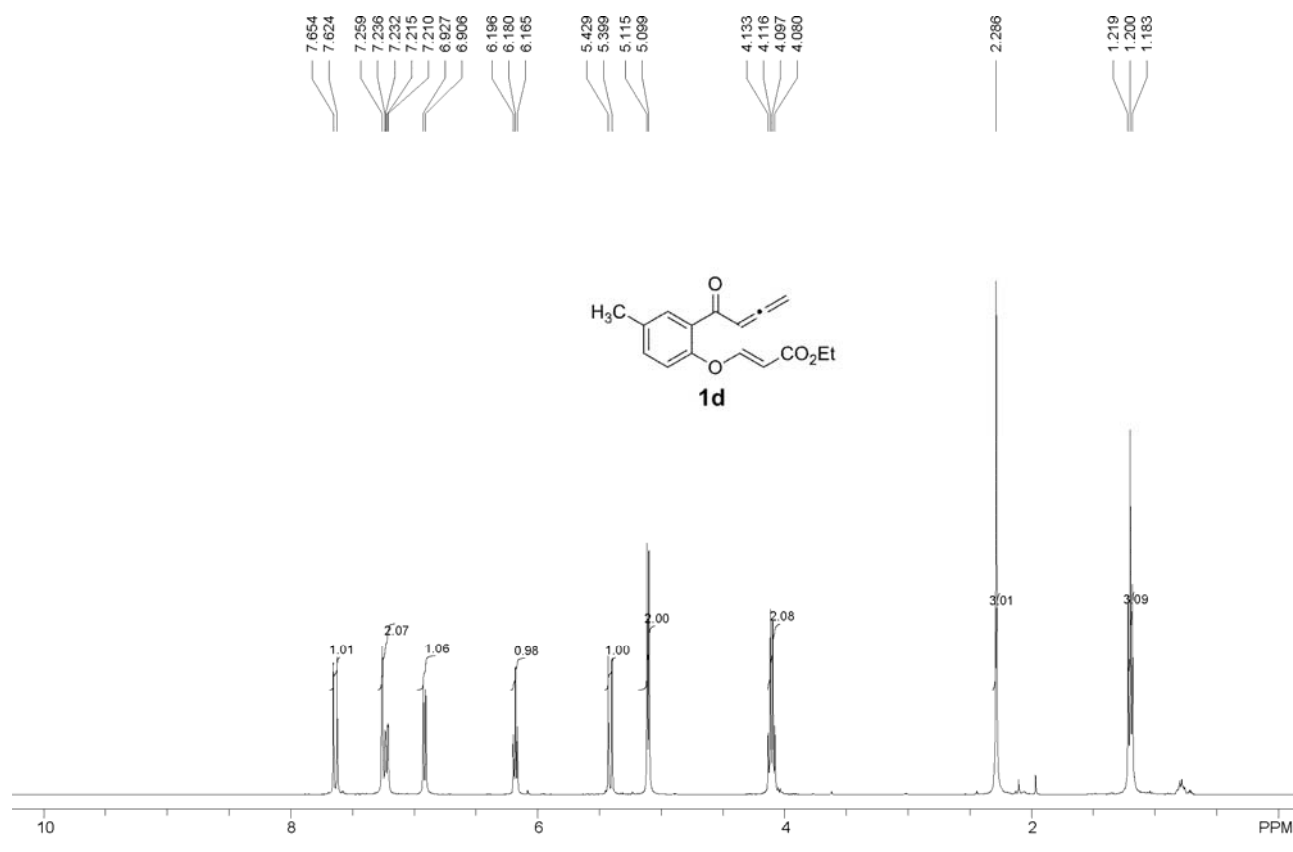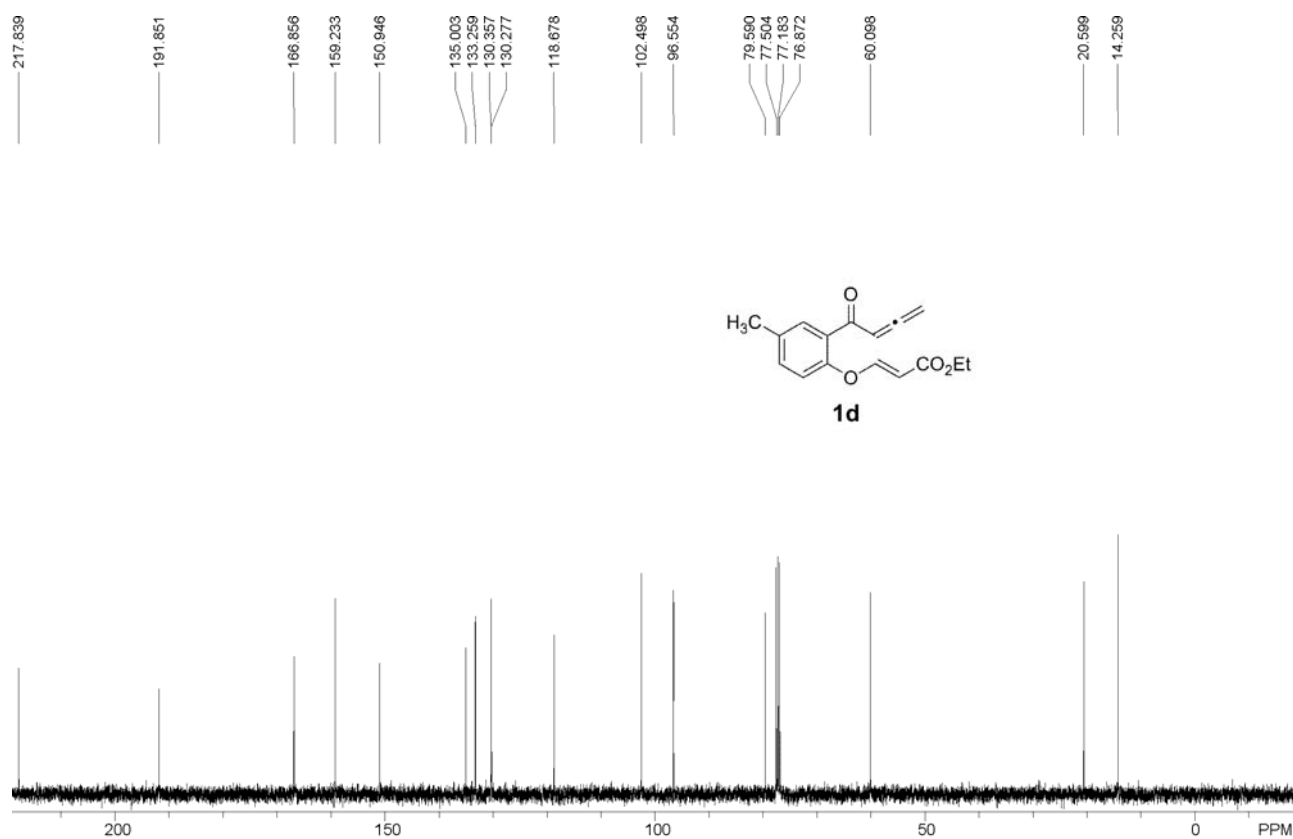

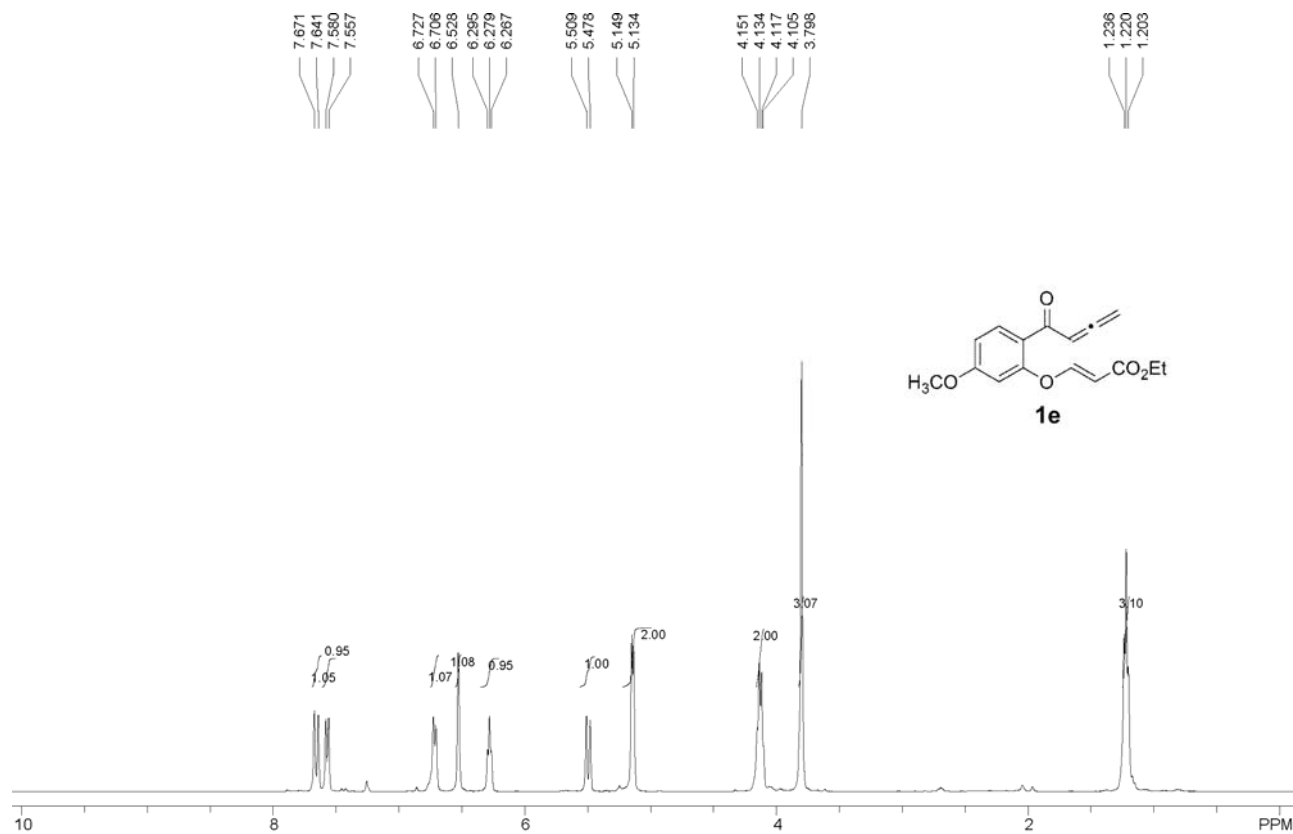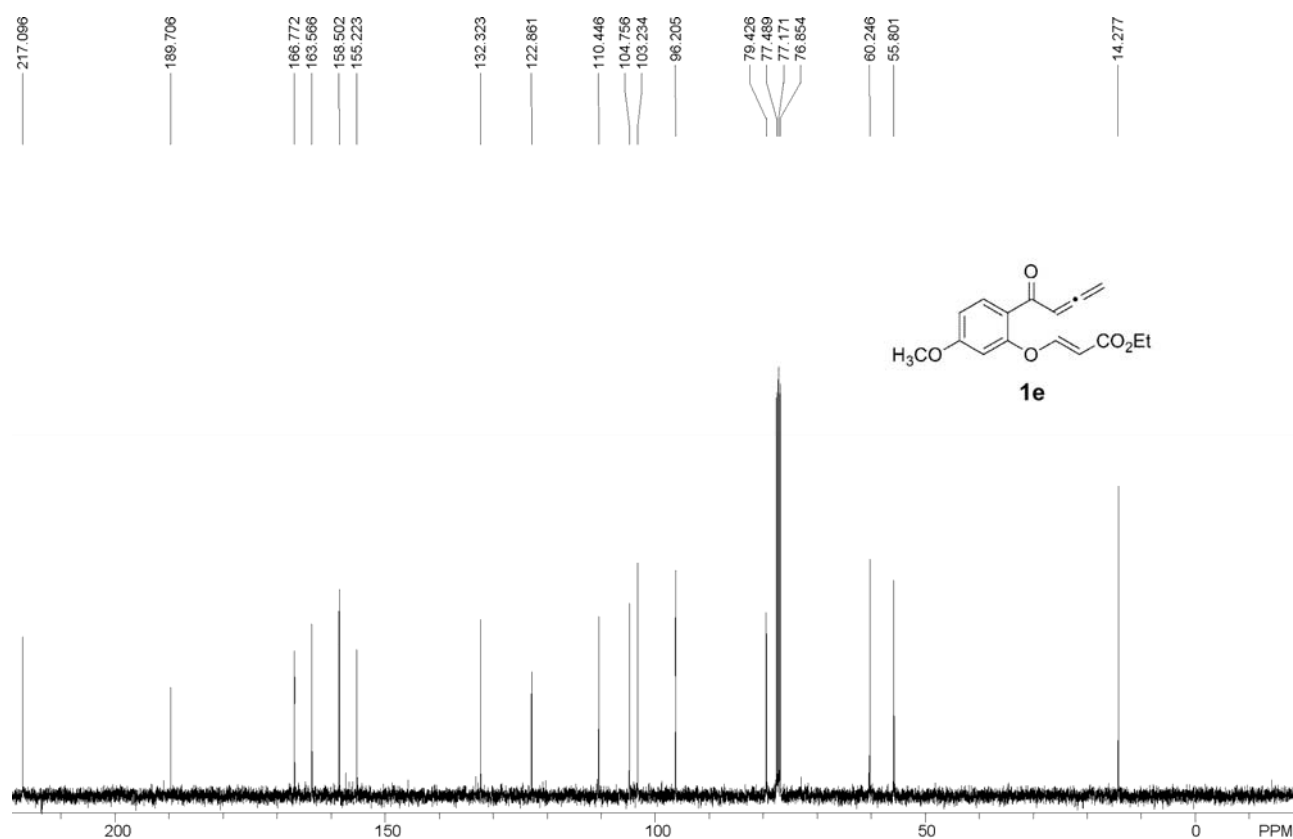

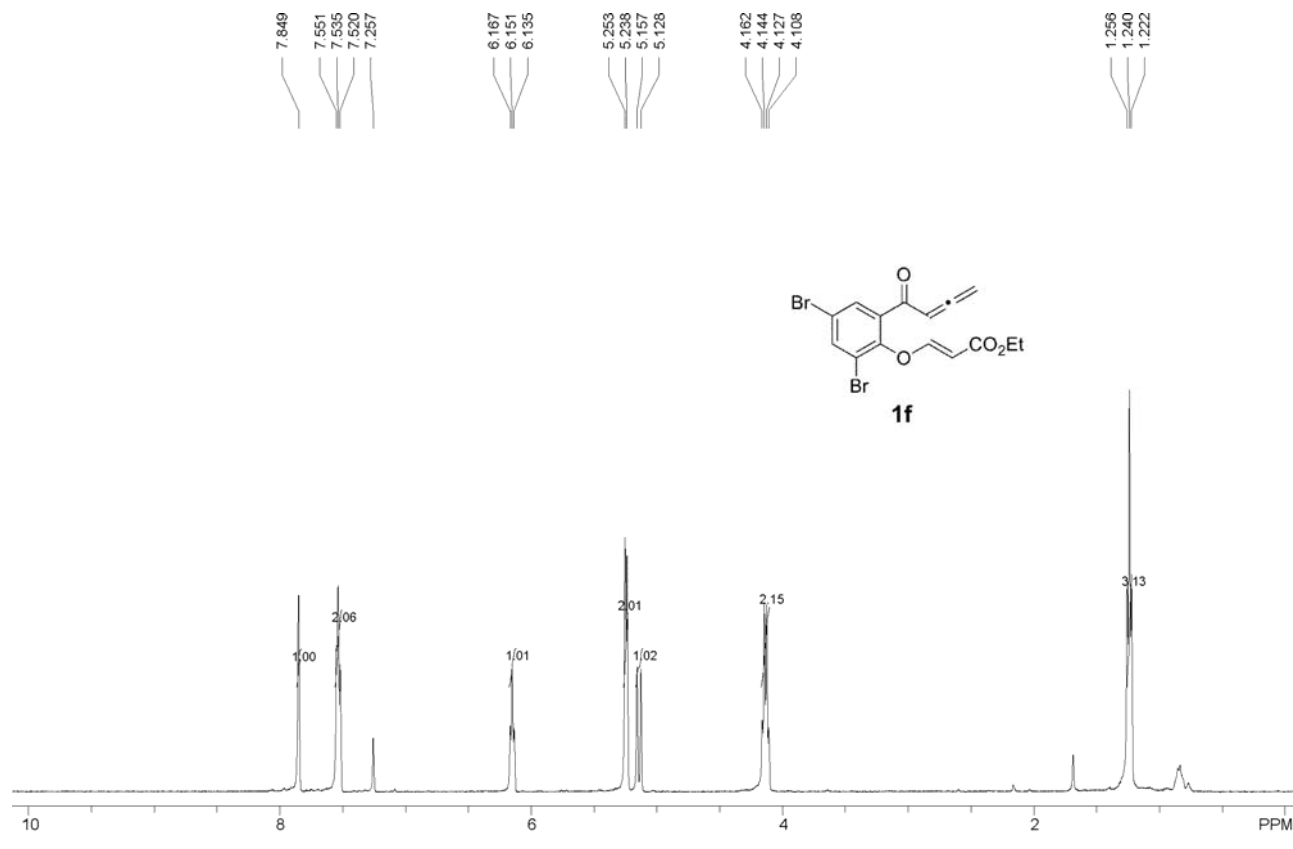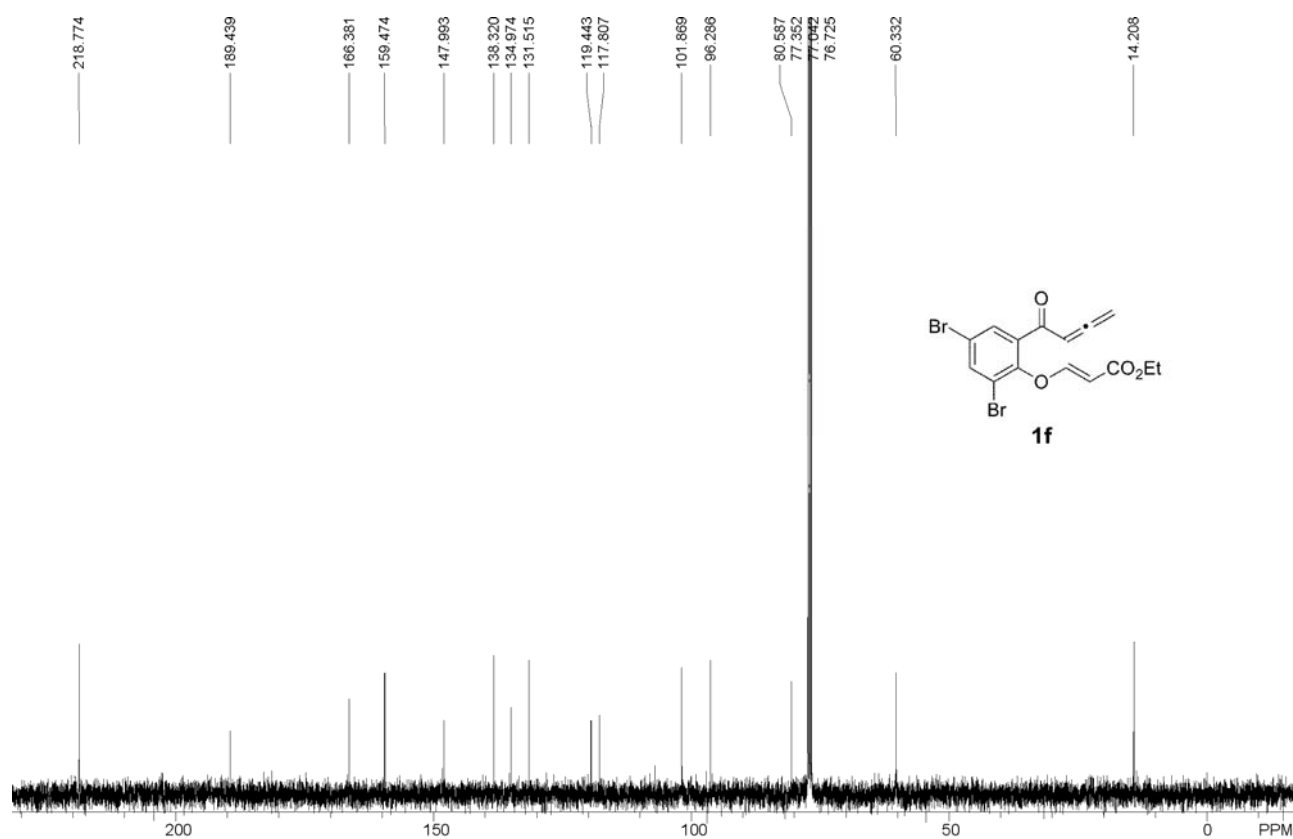

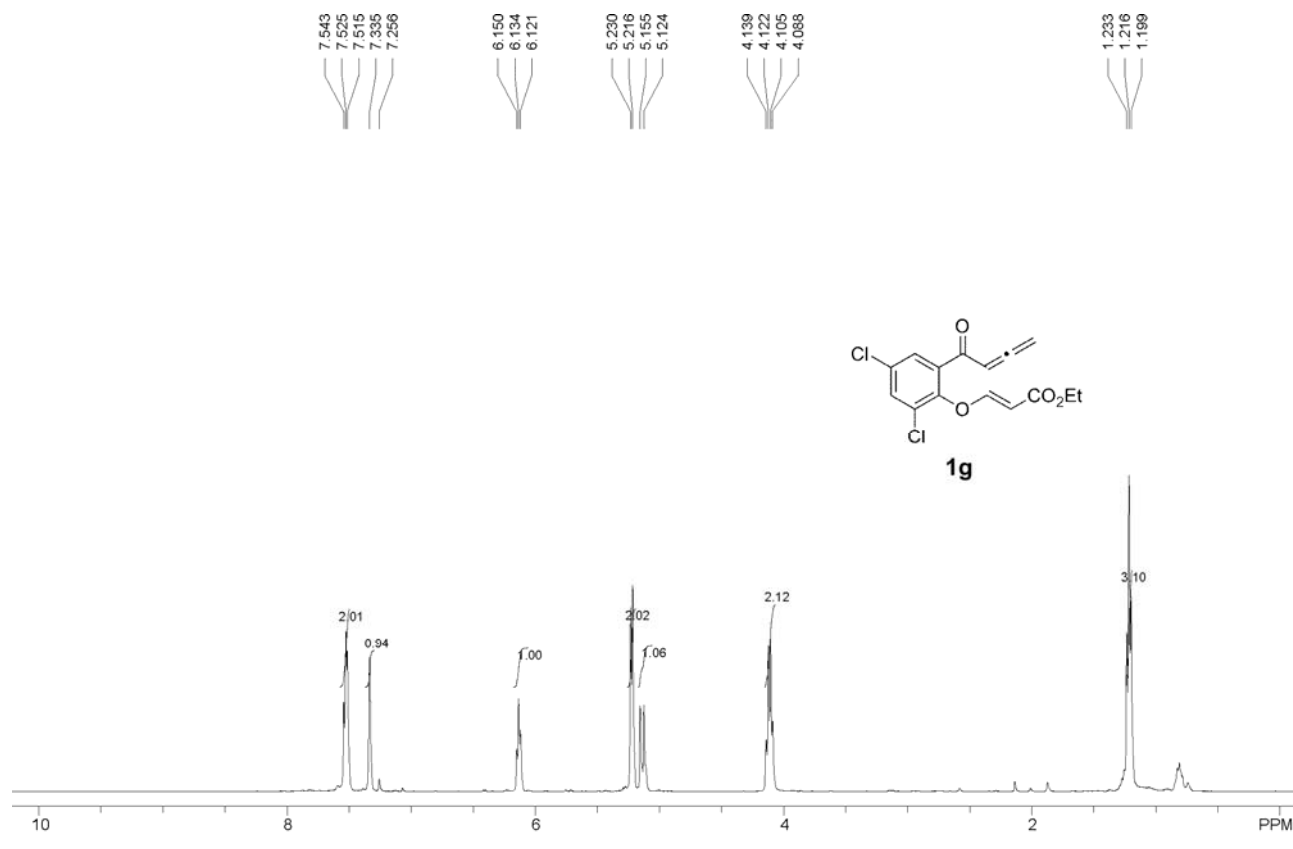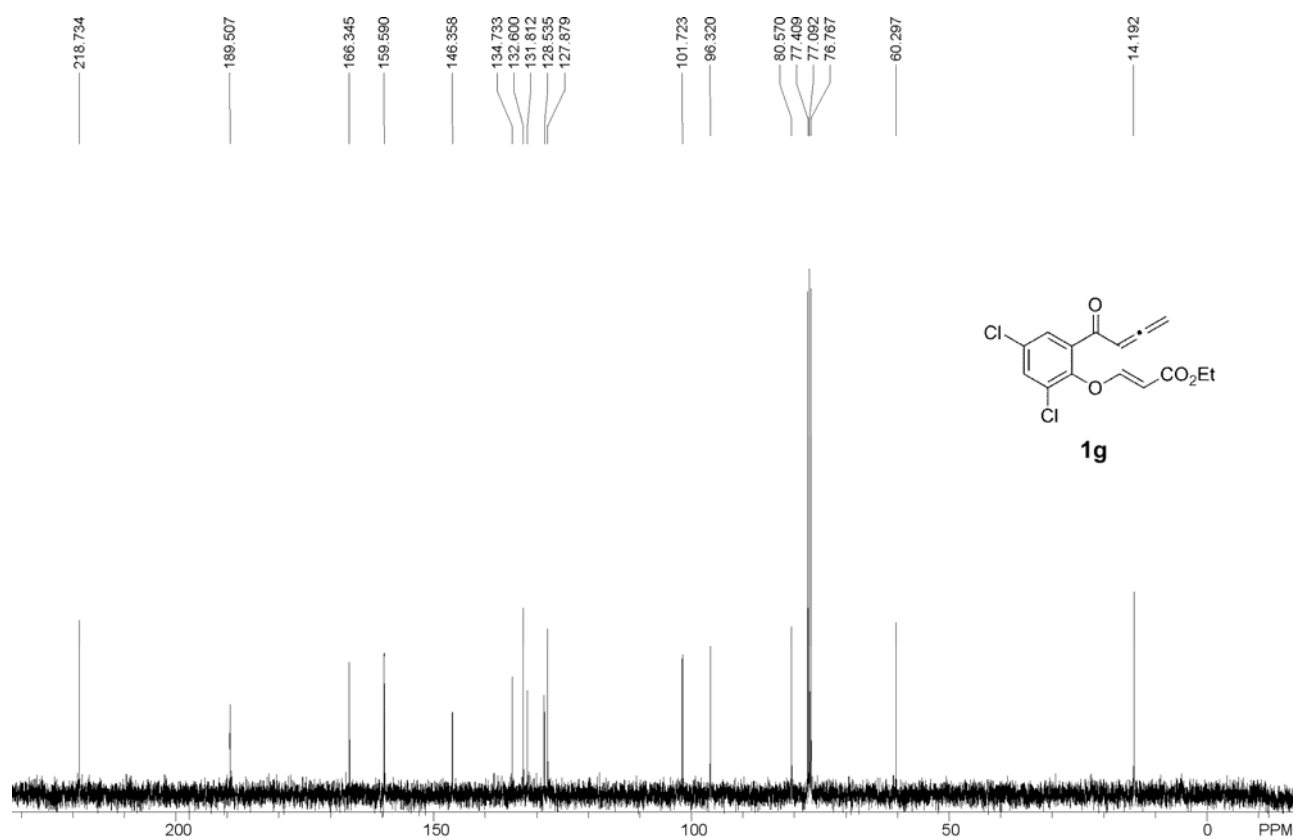

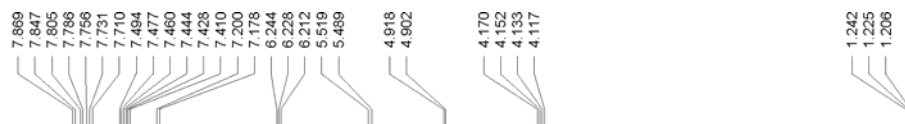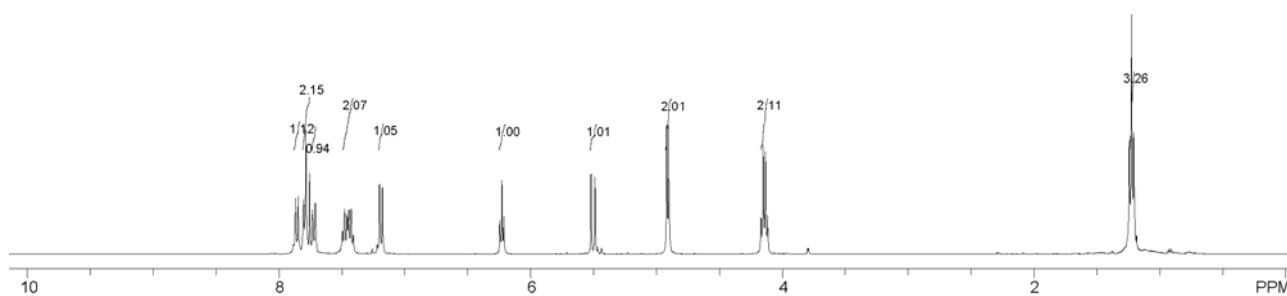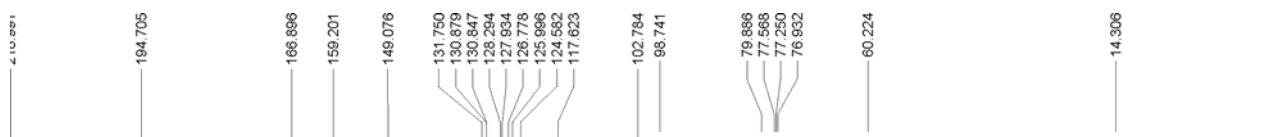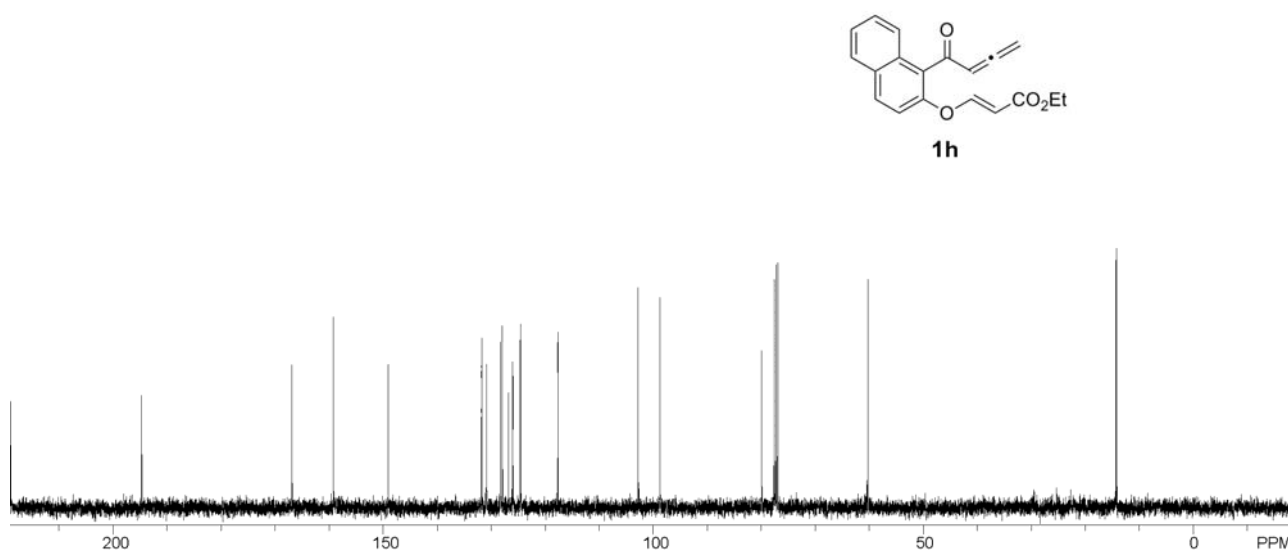

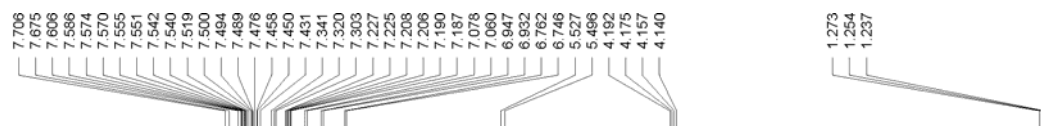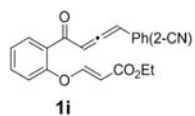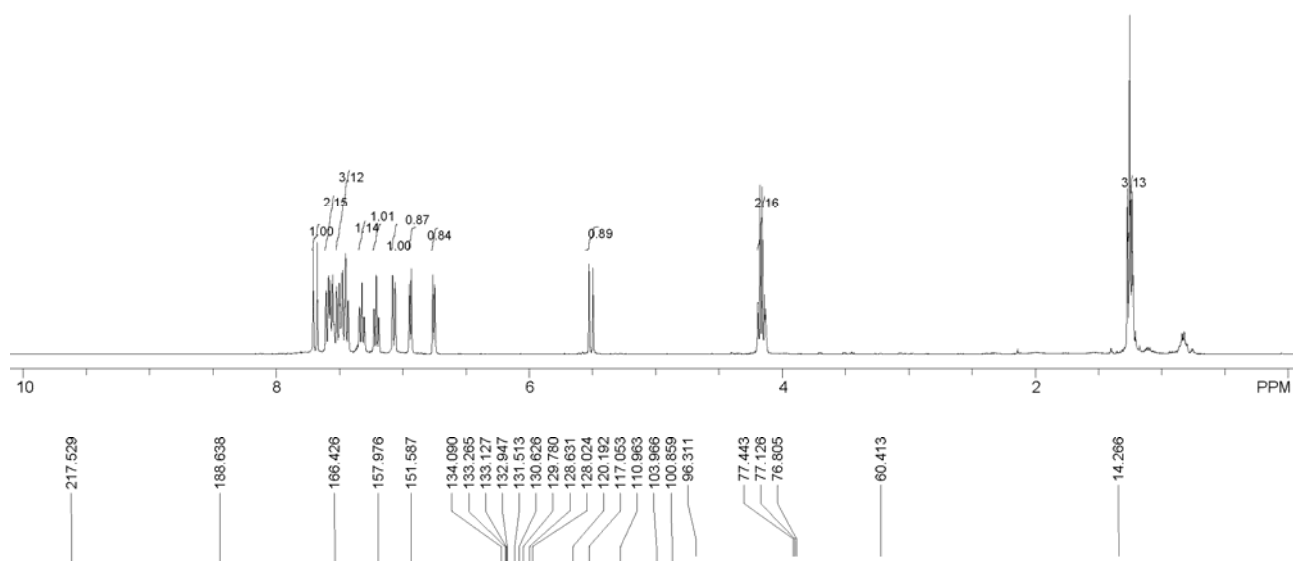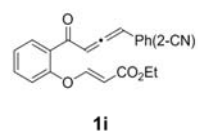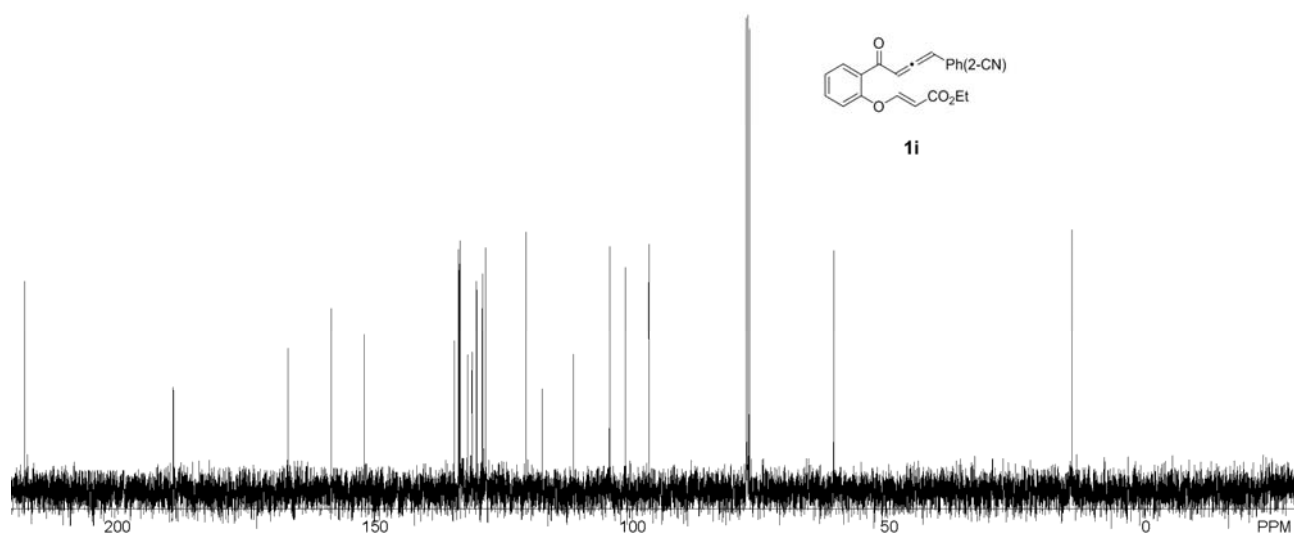

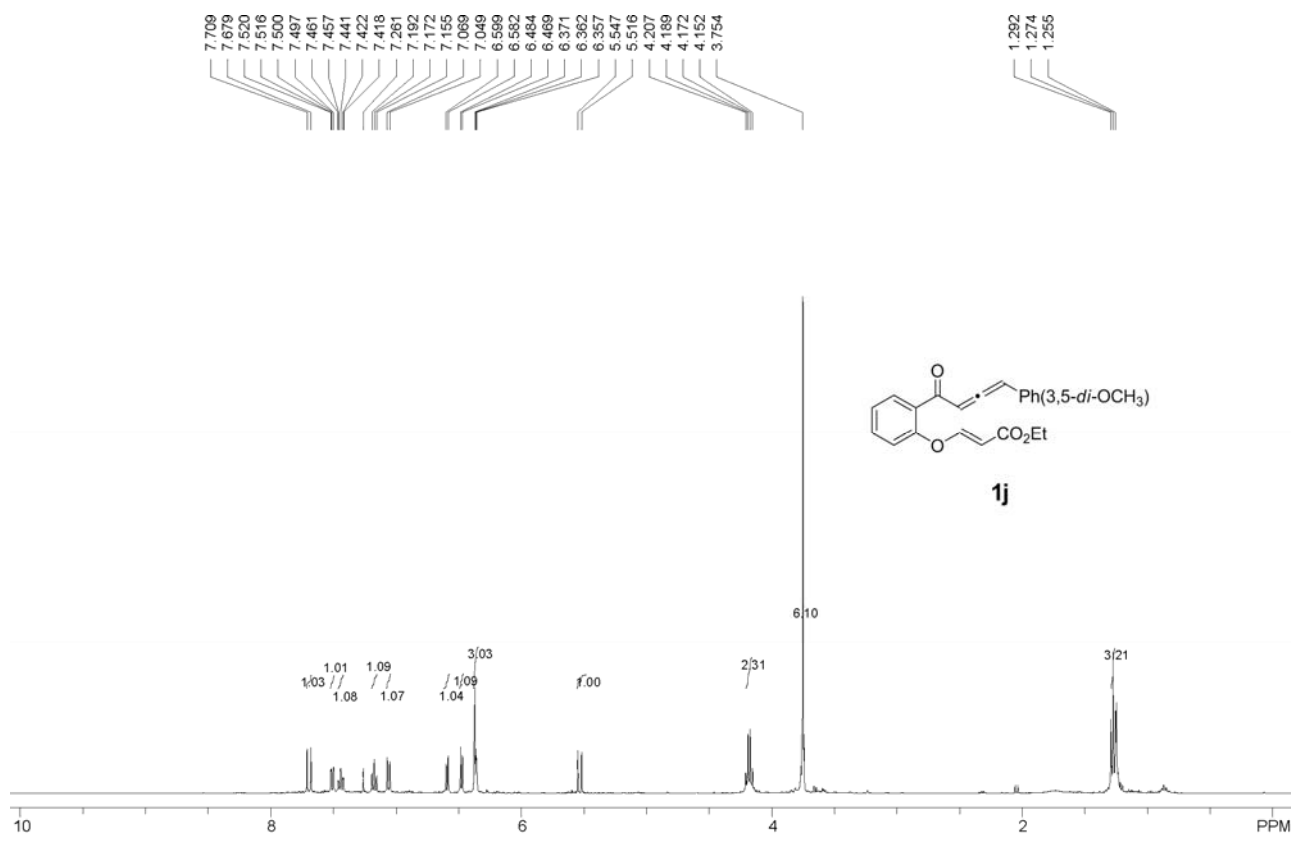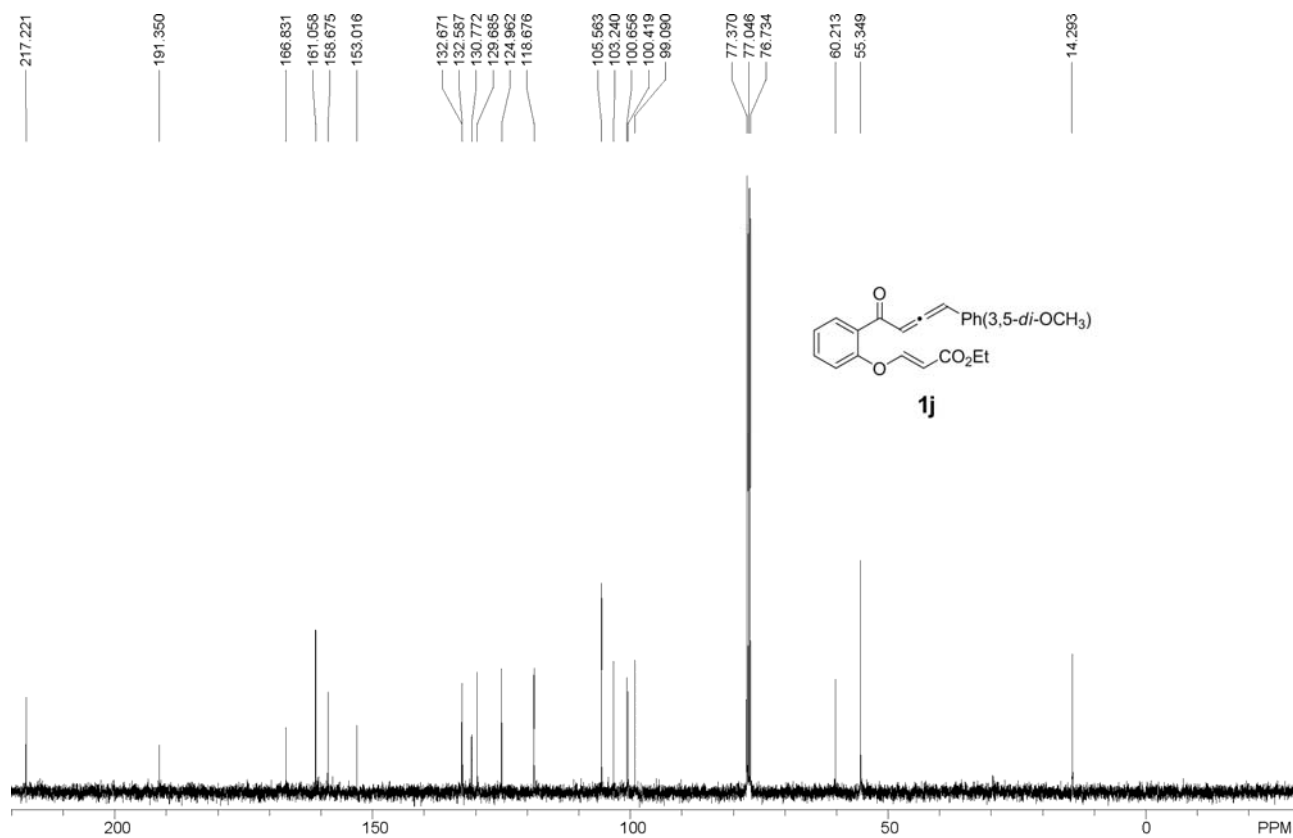

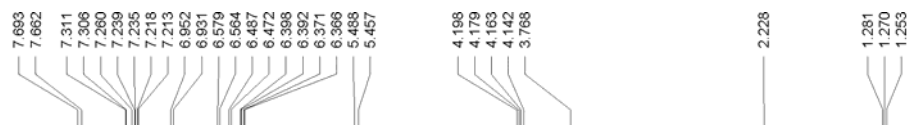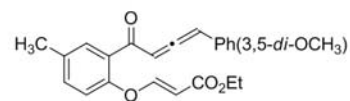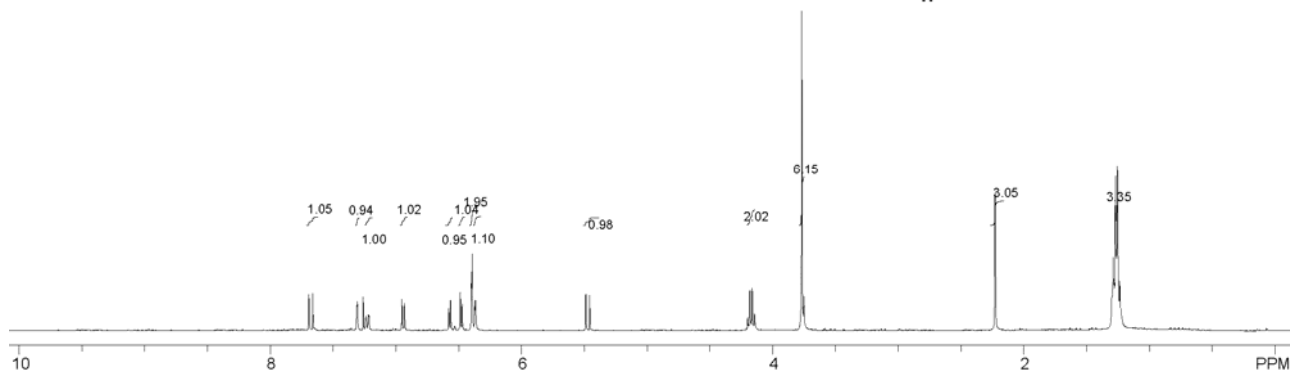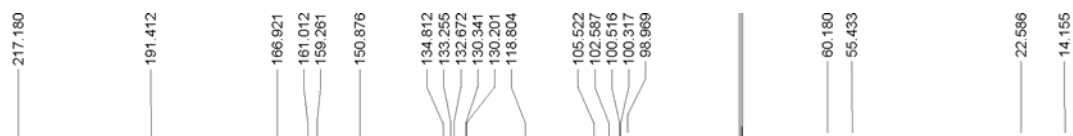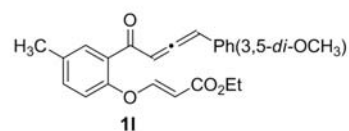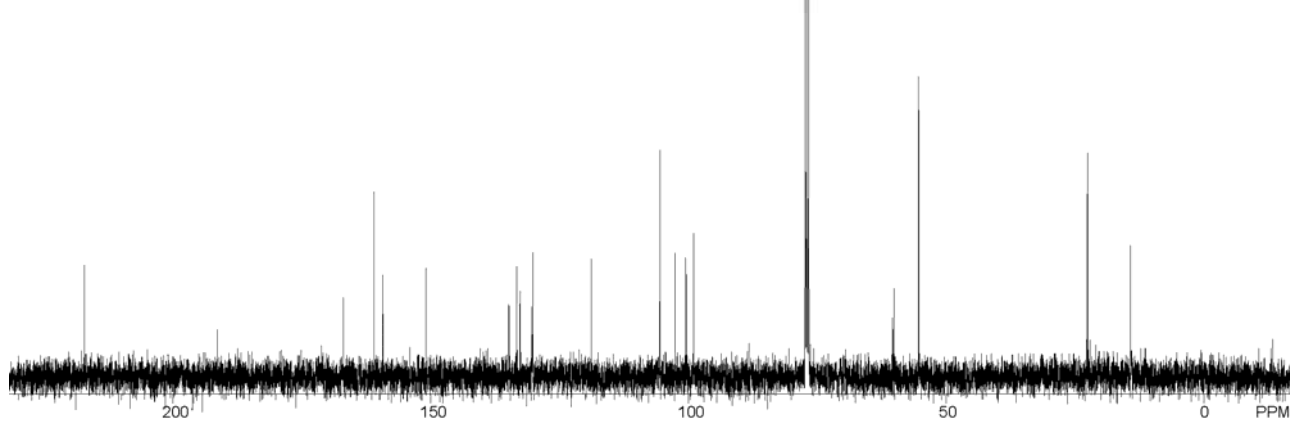

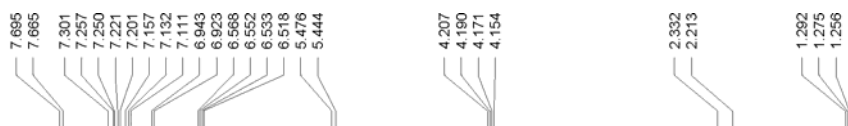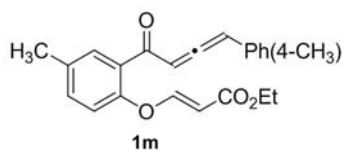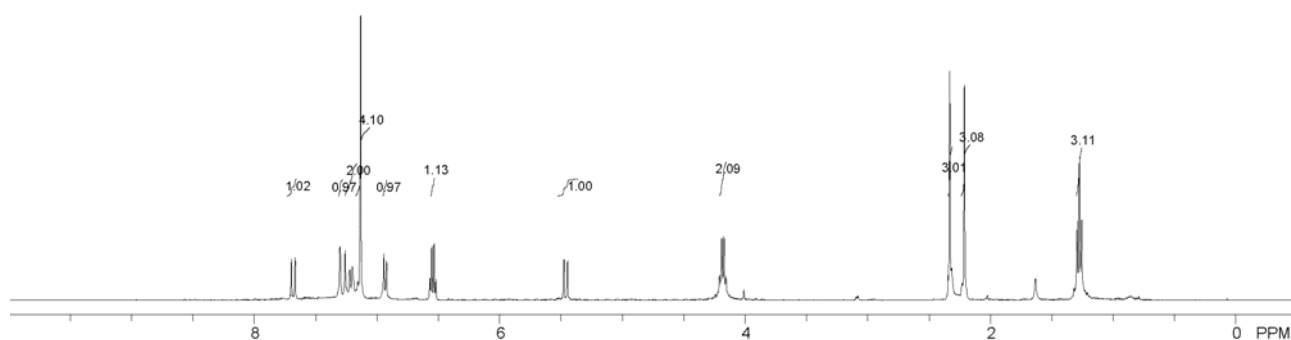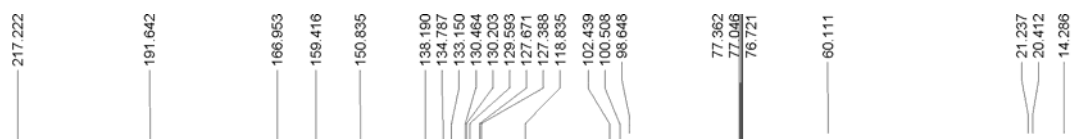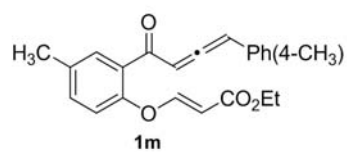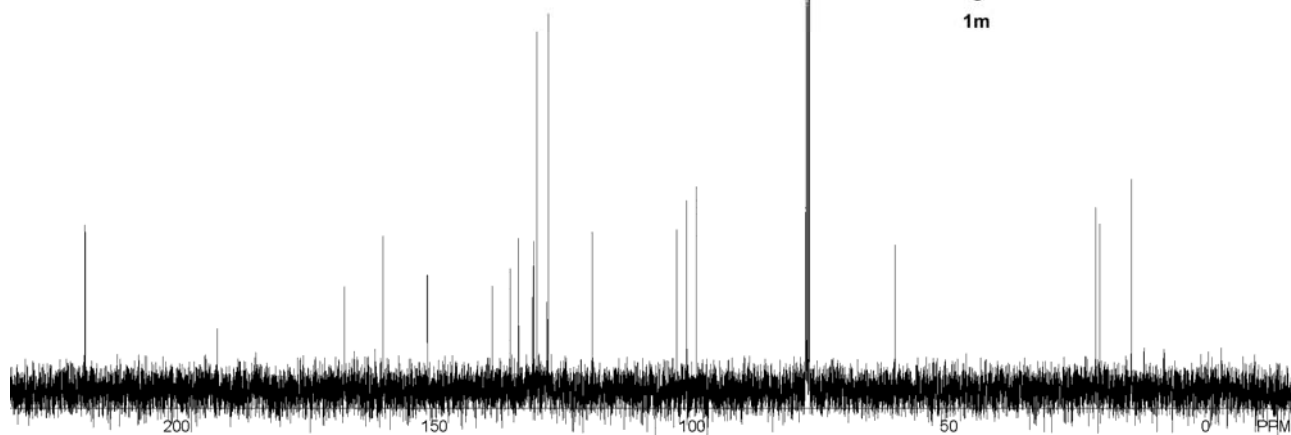

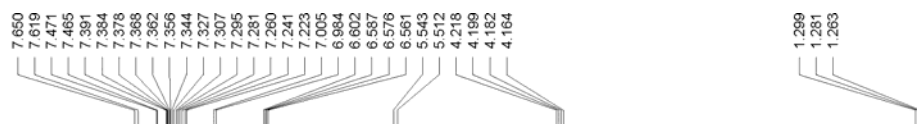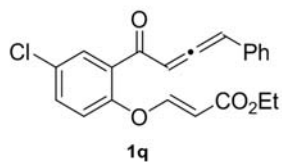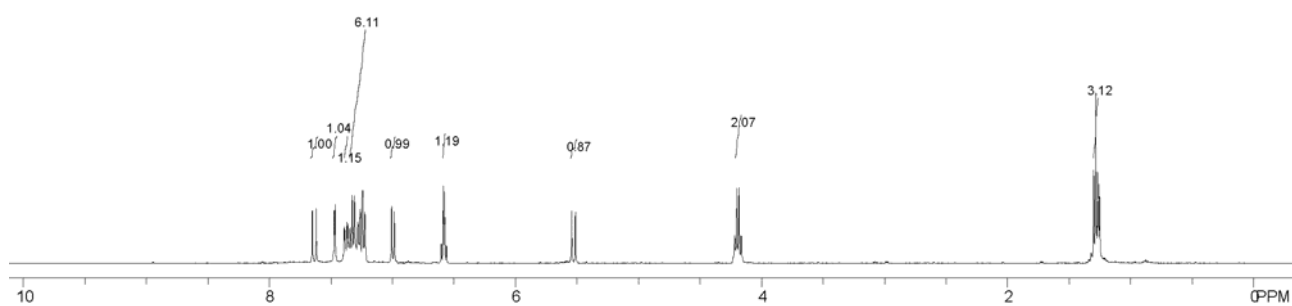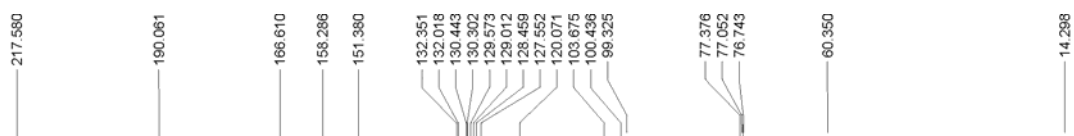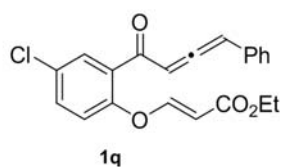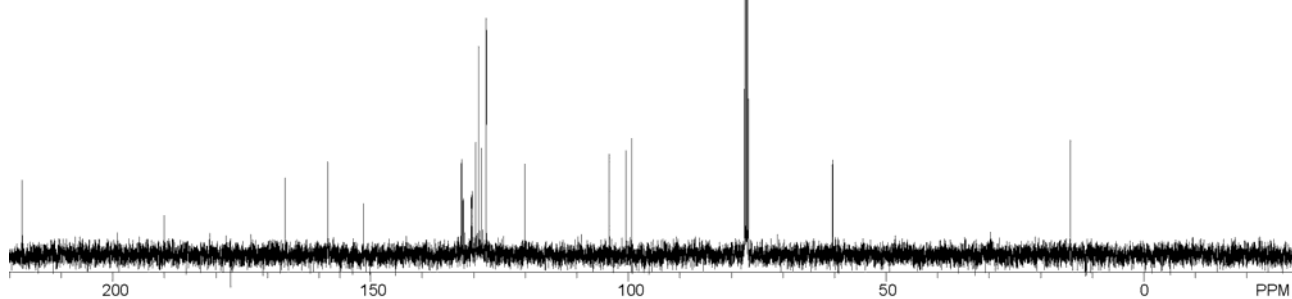

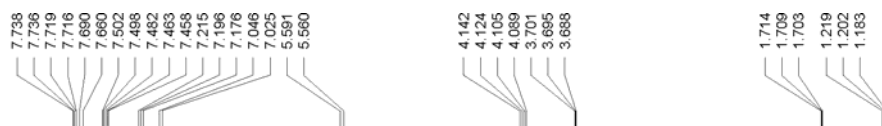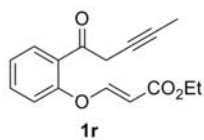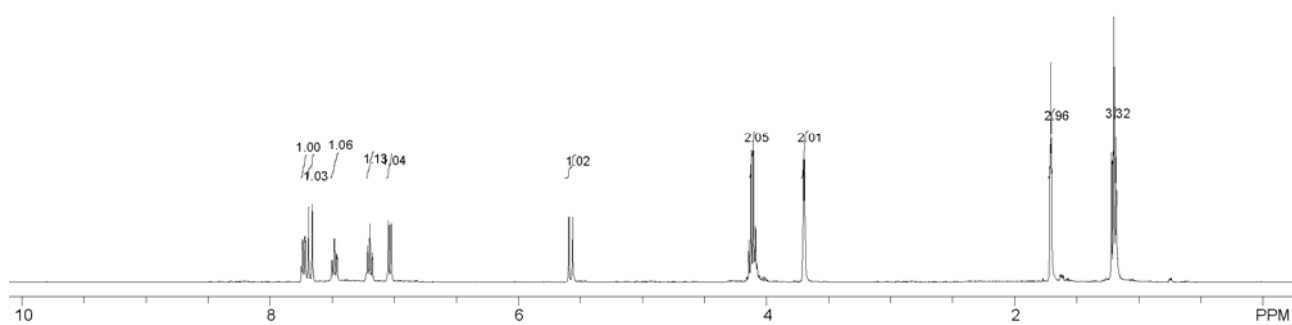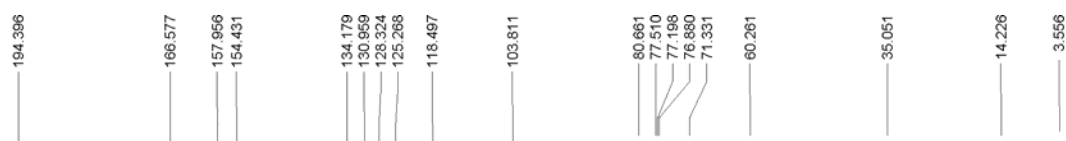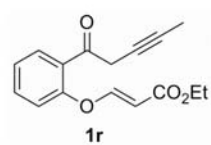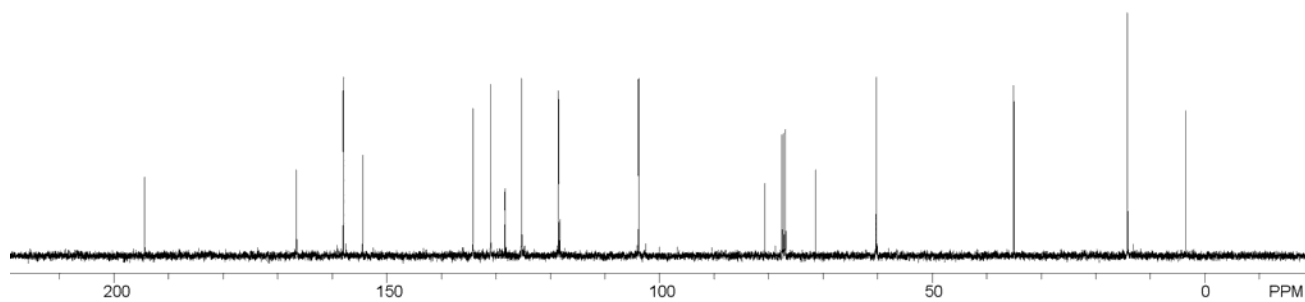

#### IV. Copies of $^1\text{H}$ and $^{13}\text{C}$ NMR spectra of compounds 2a-2r

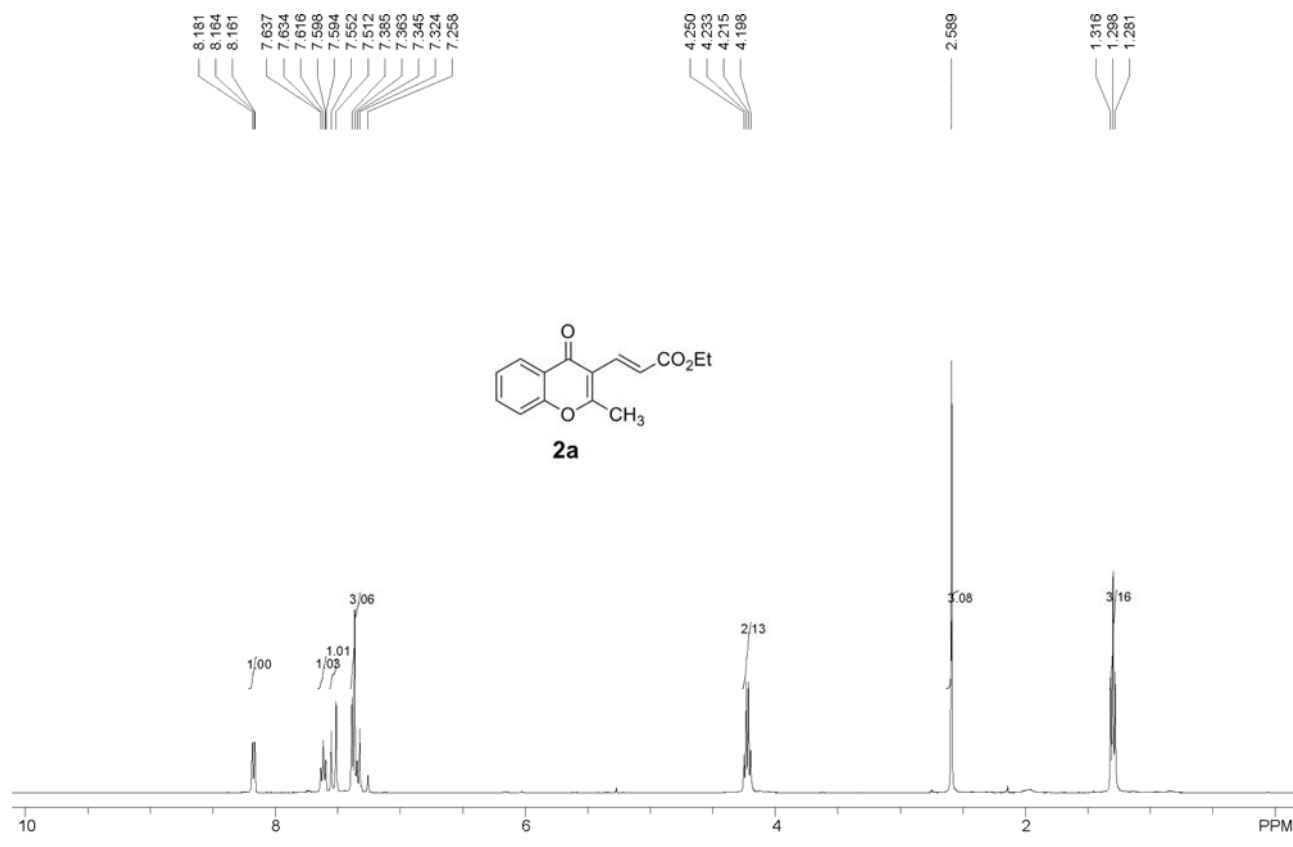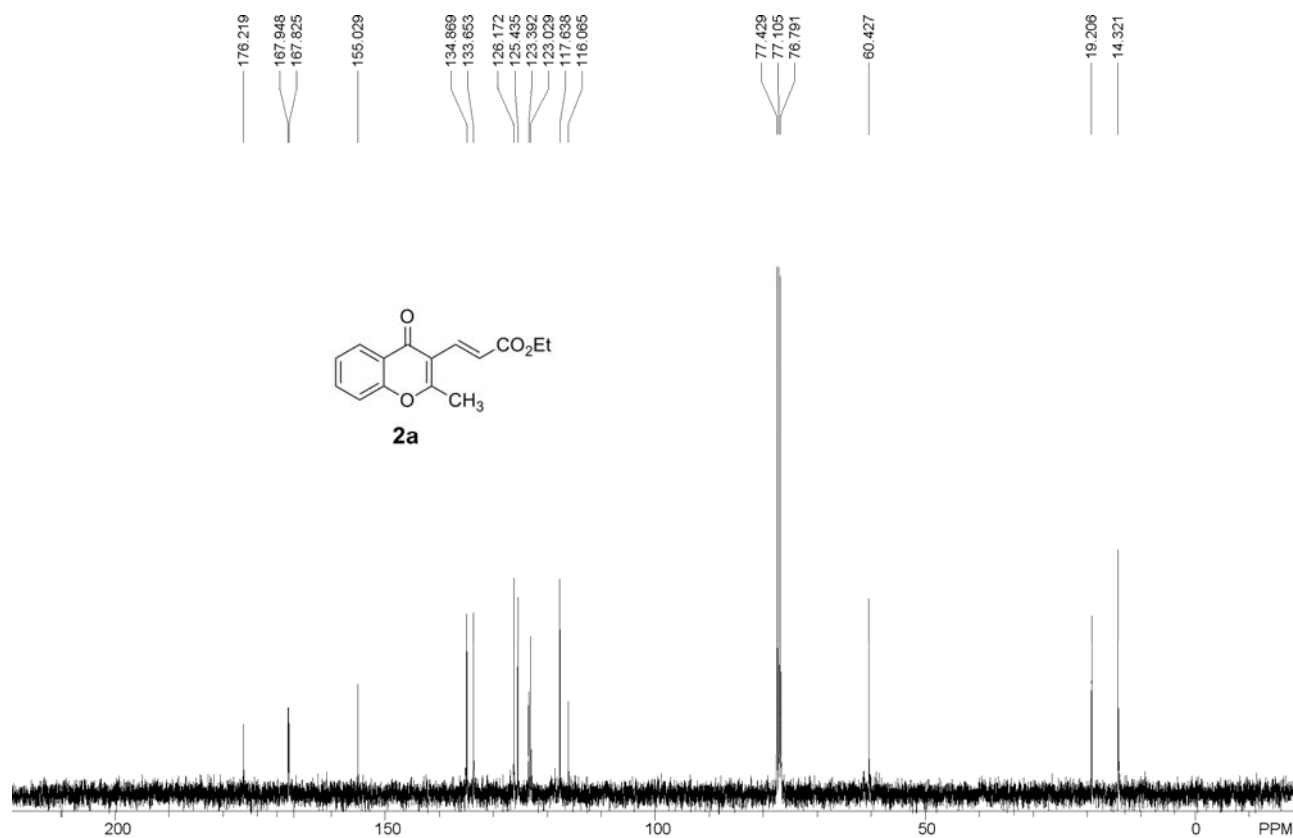

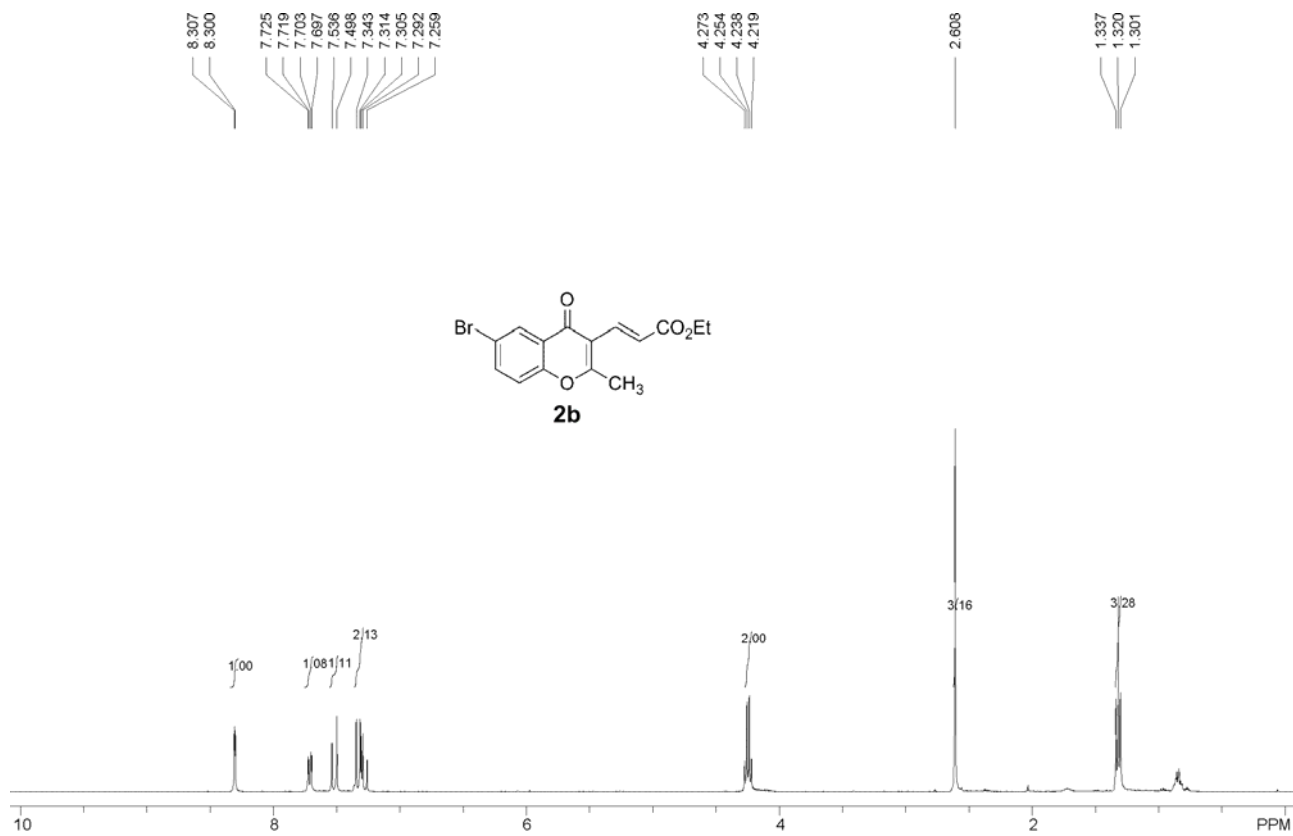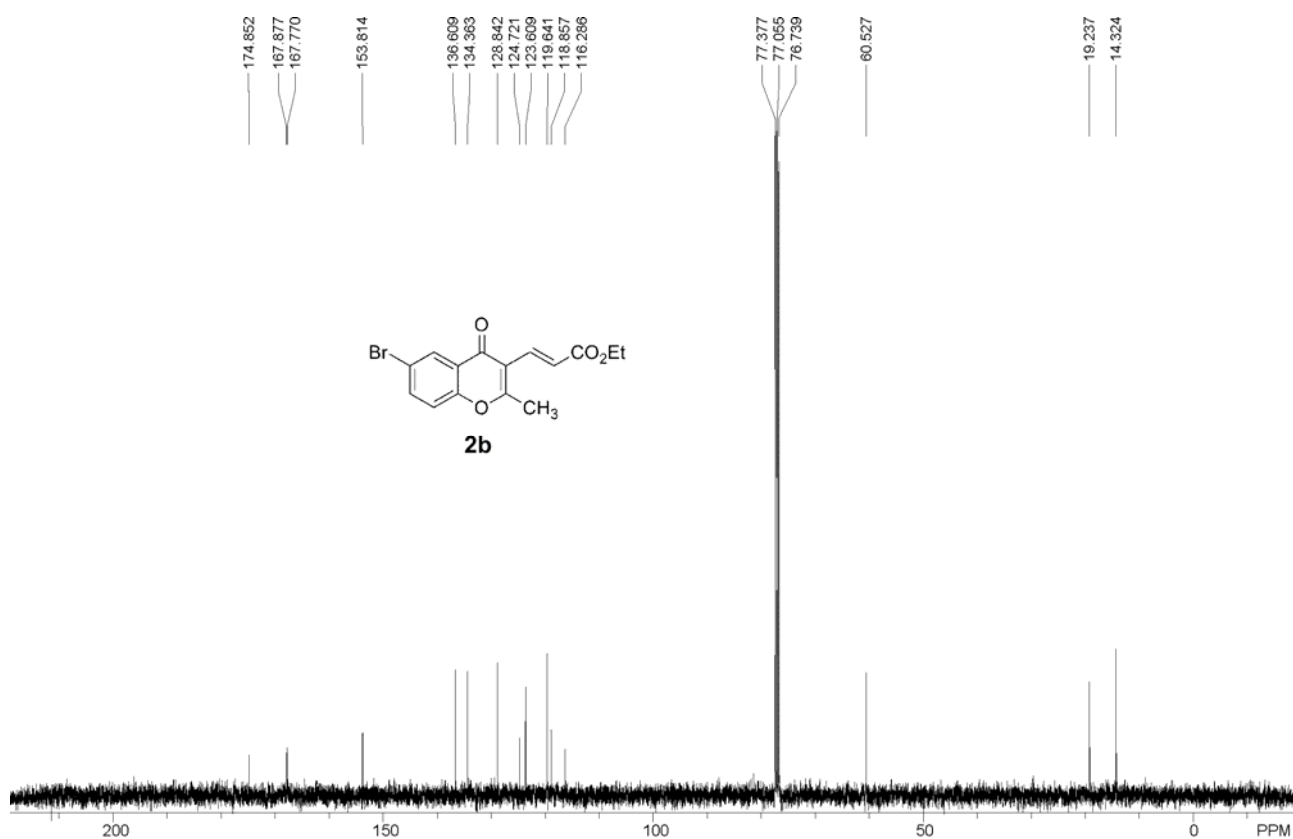

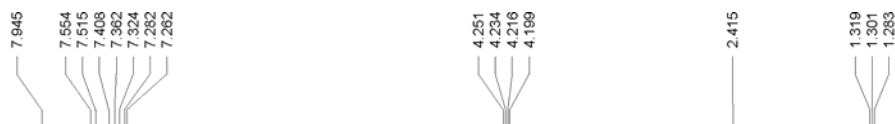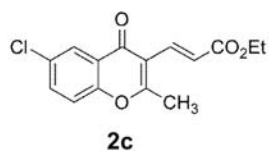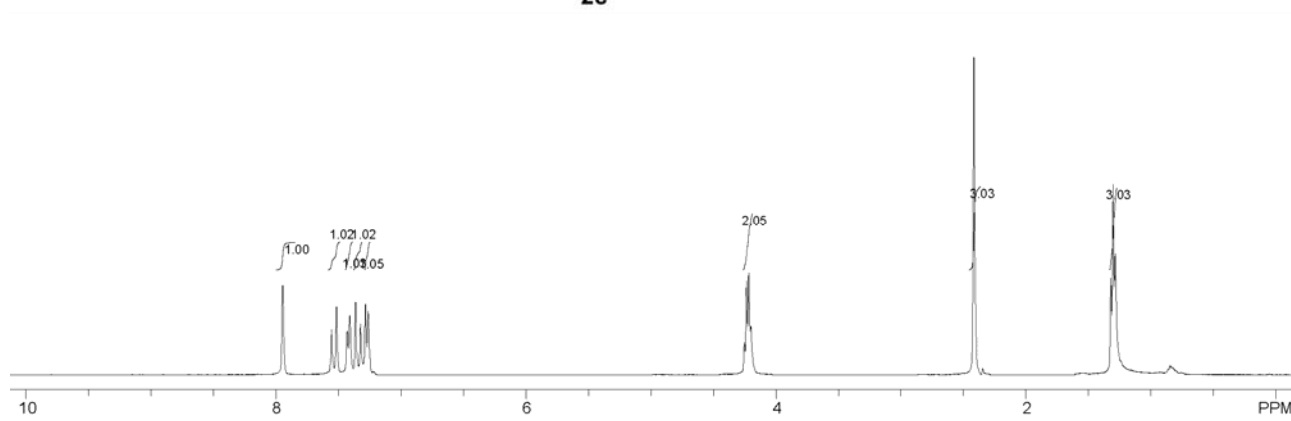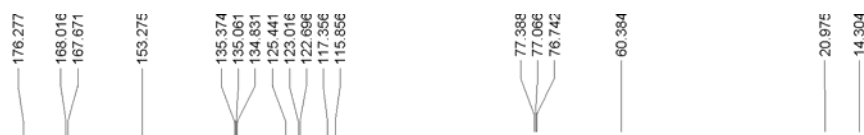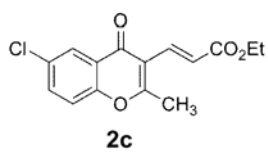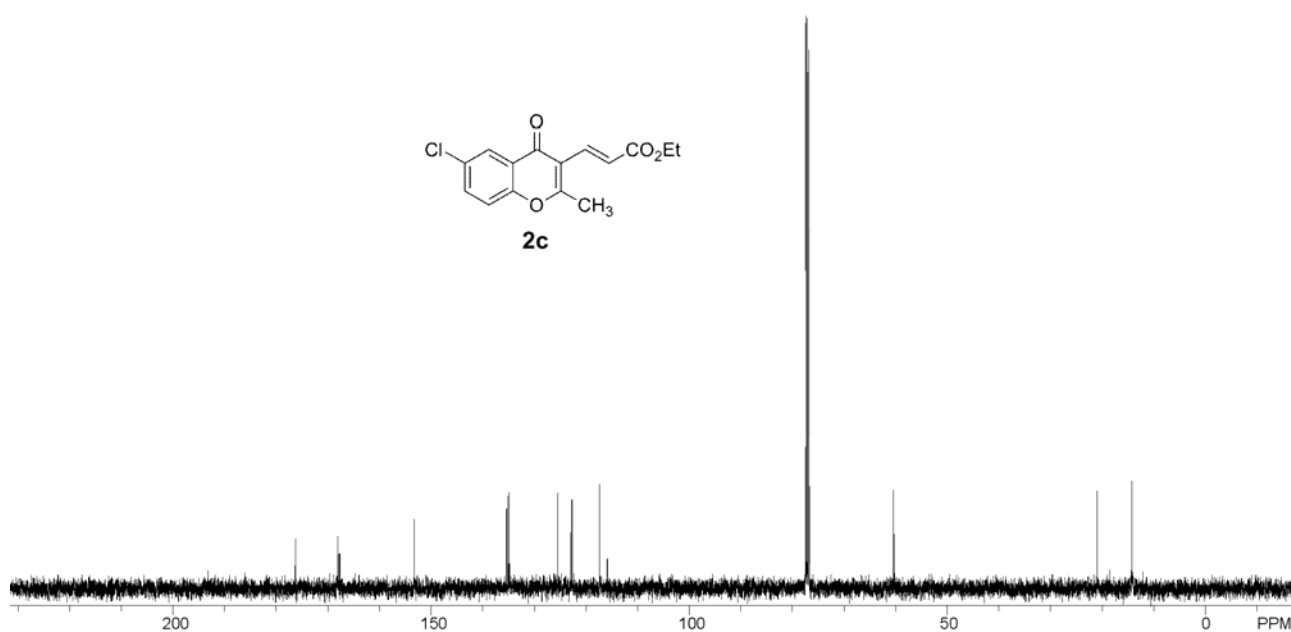

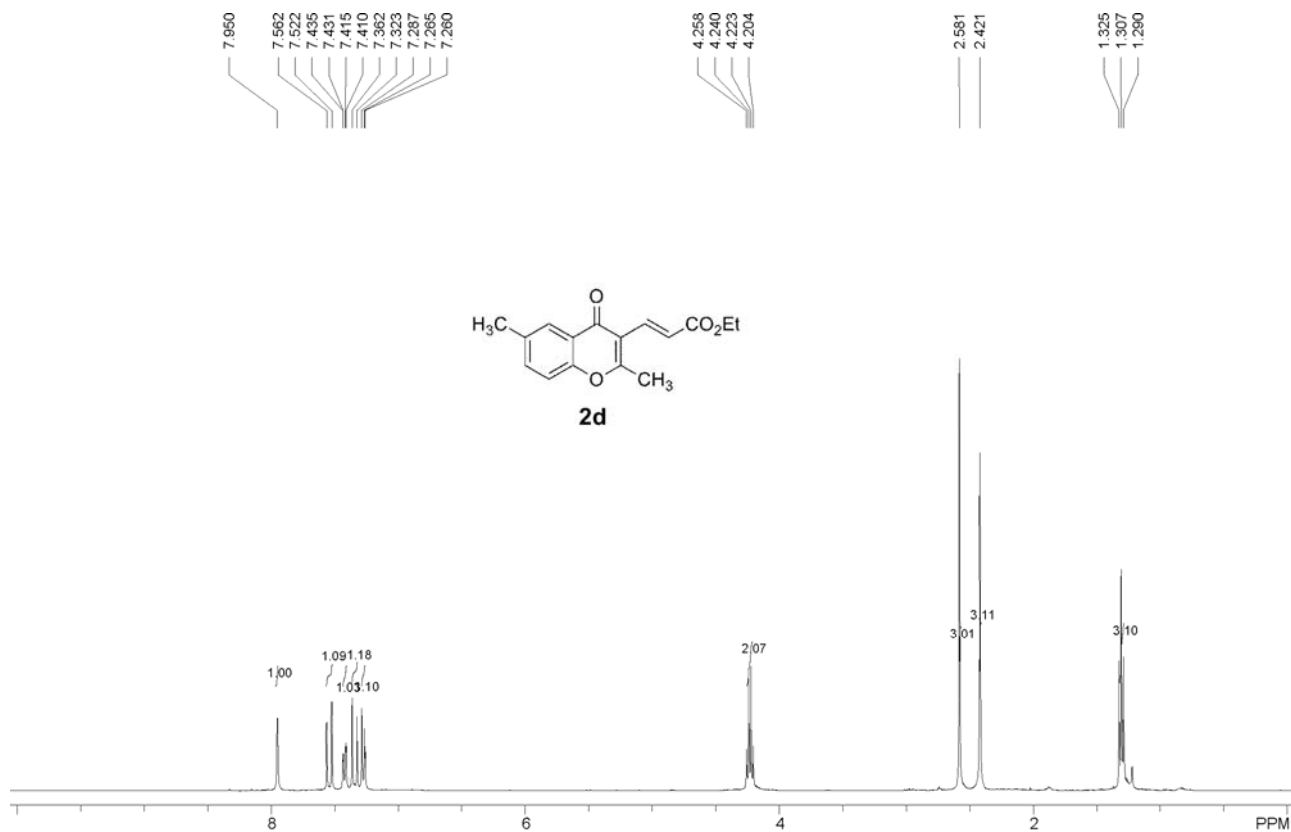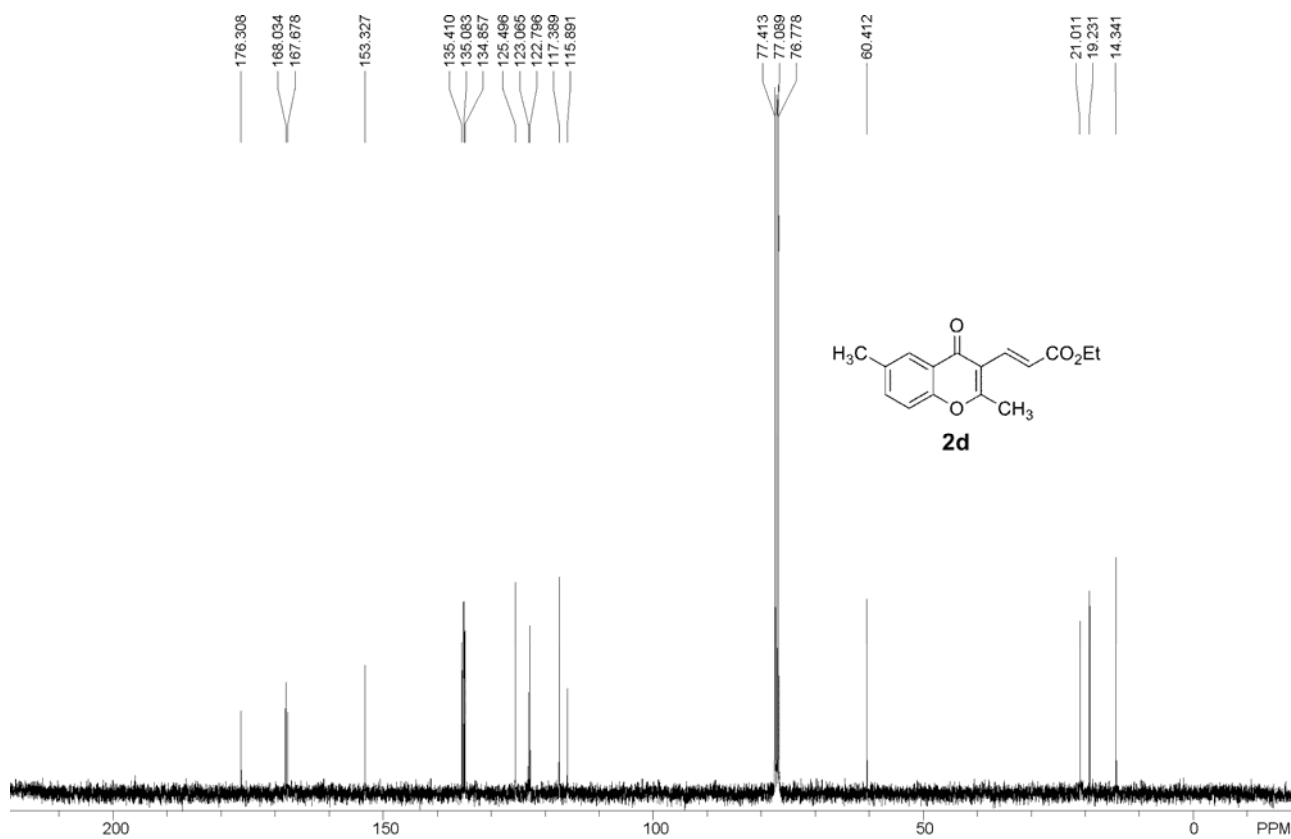

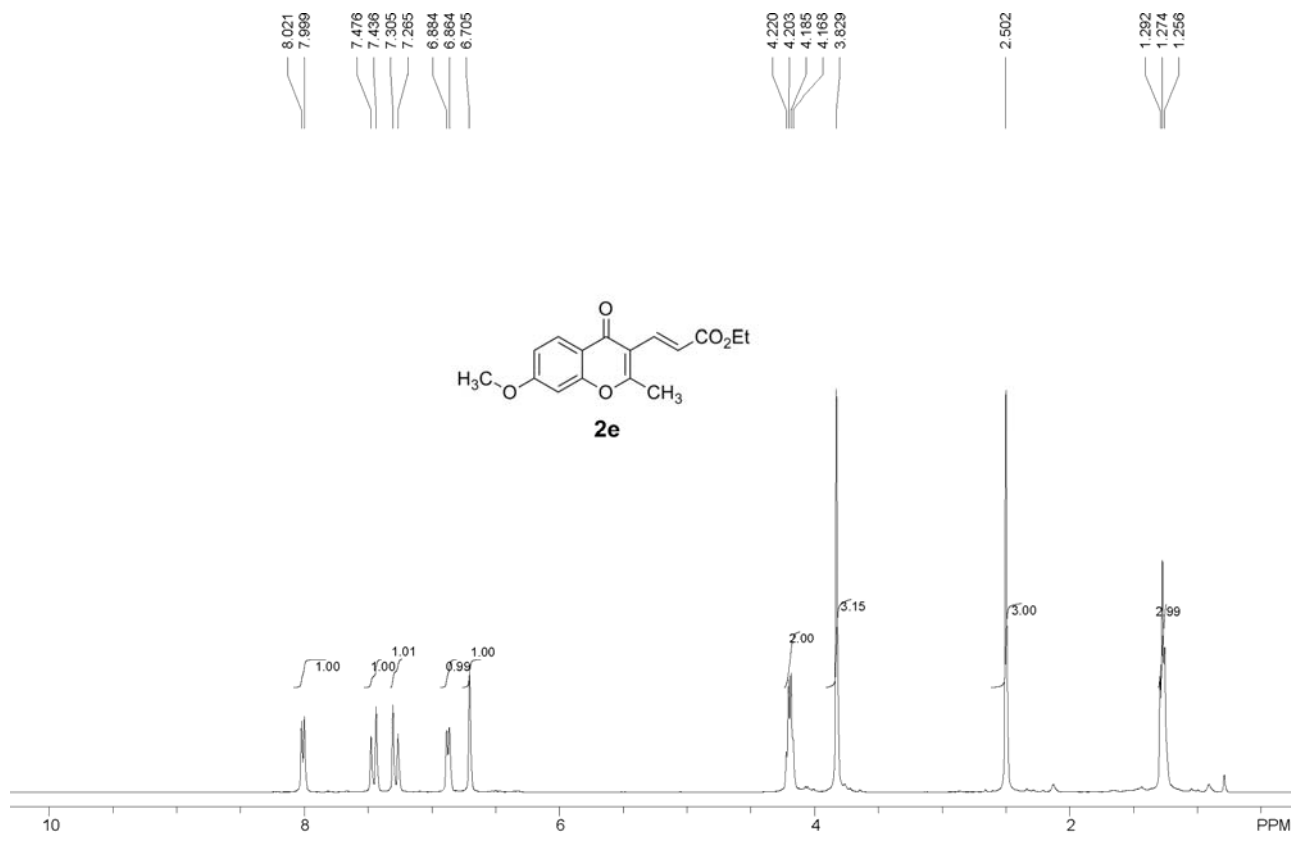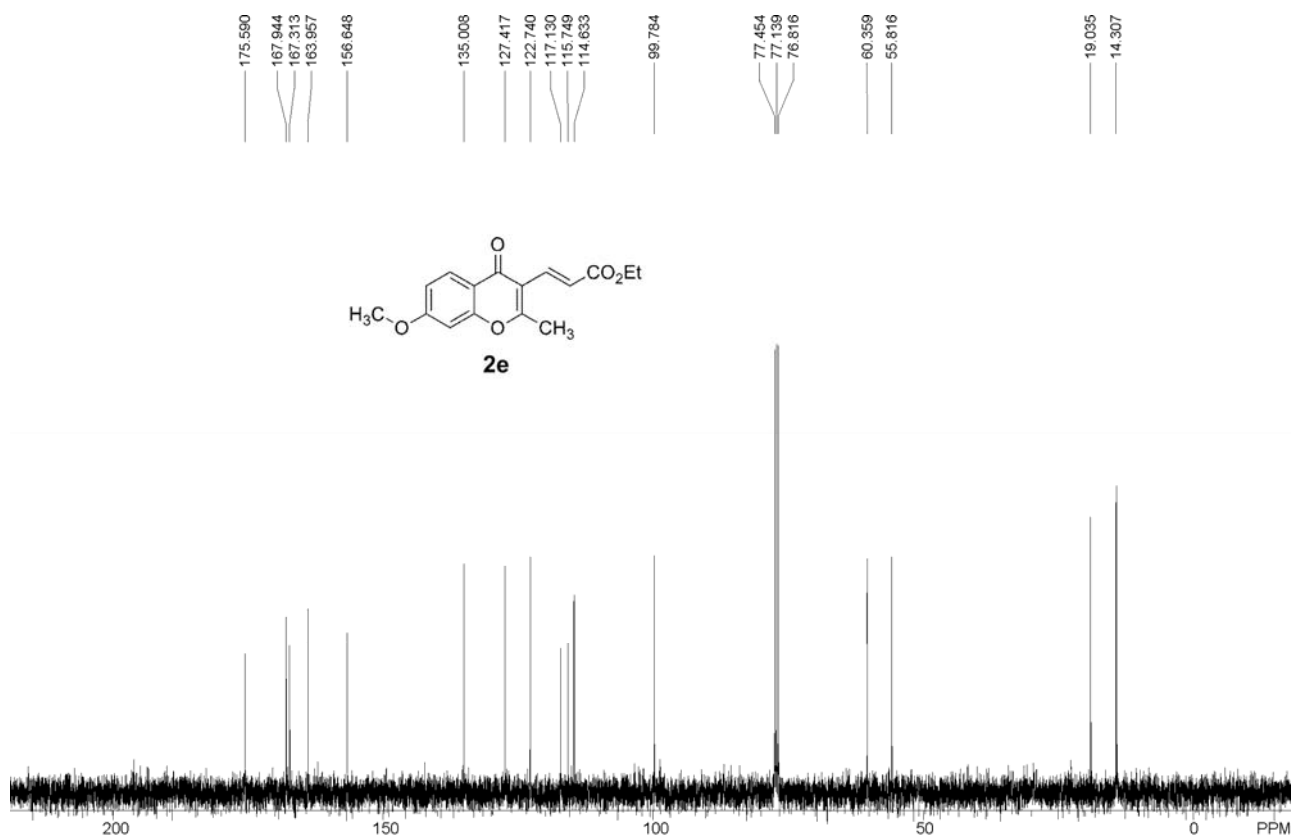

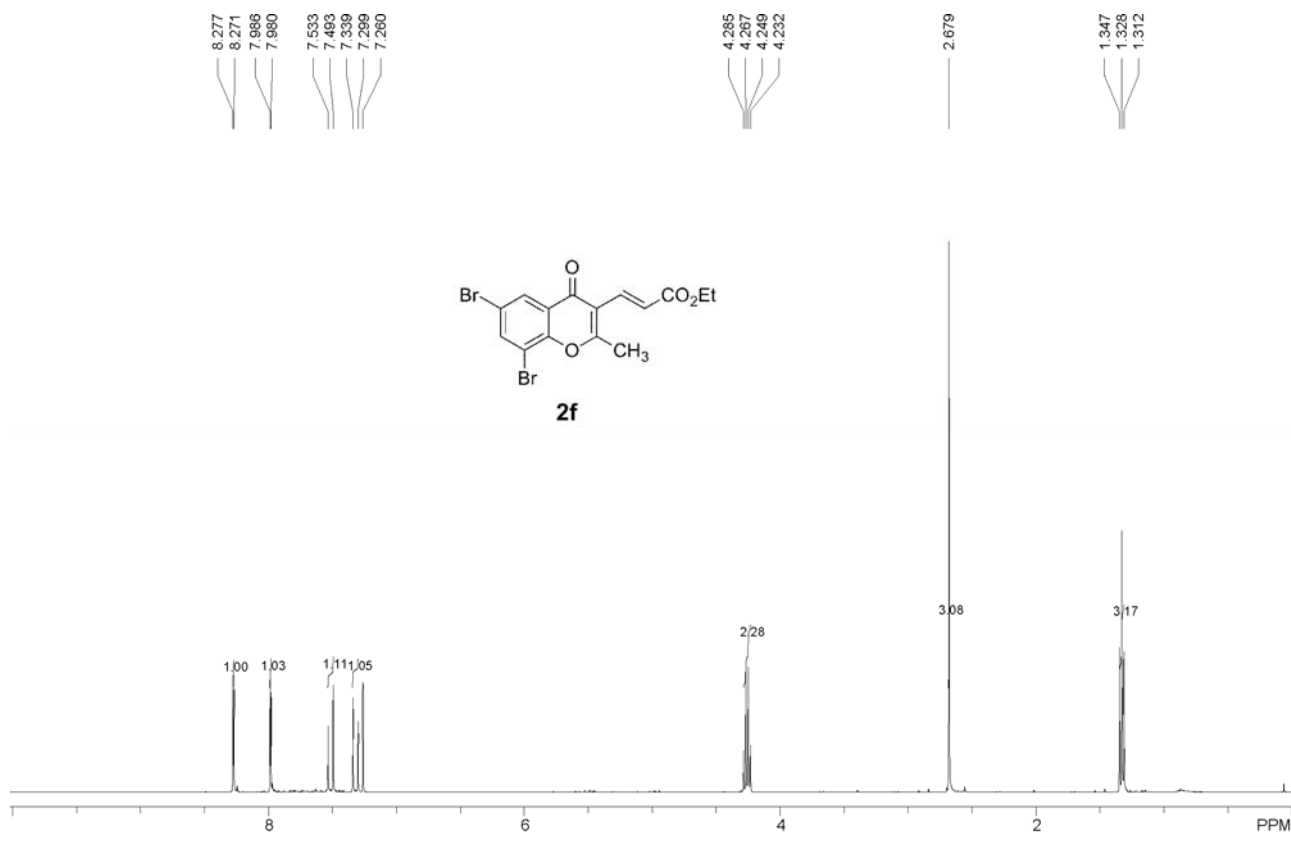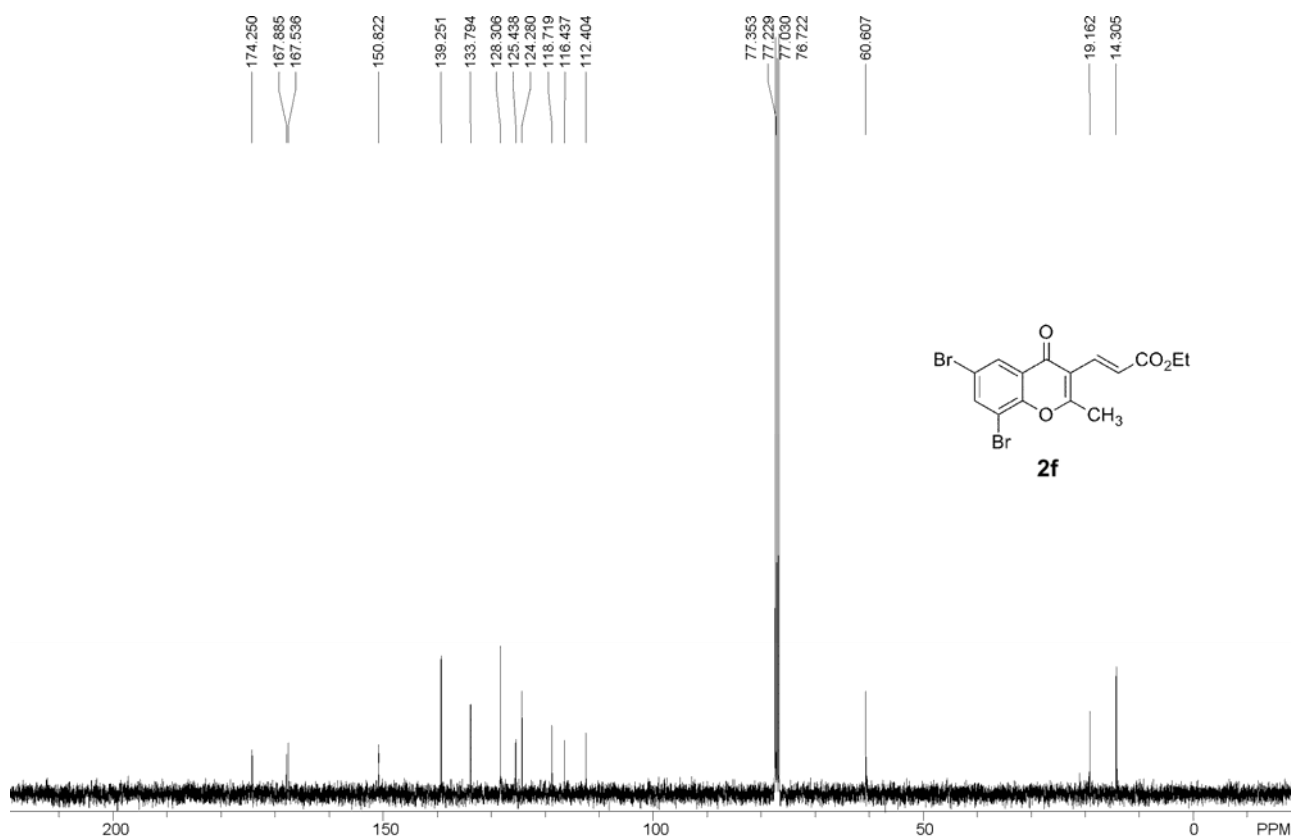

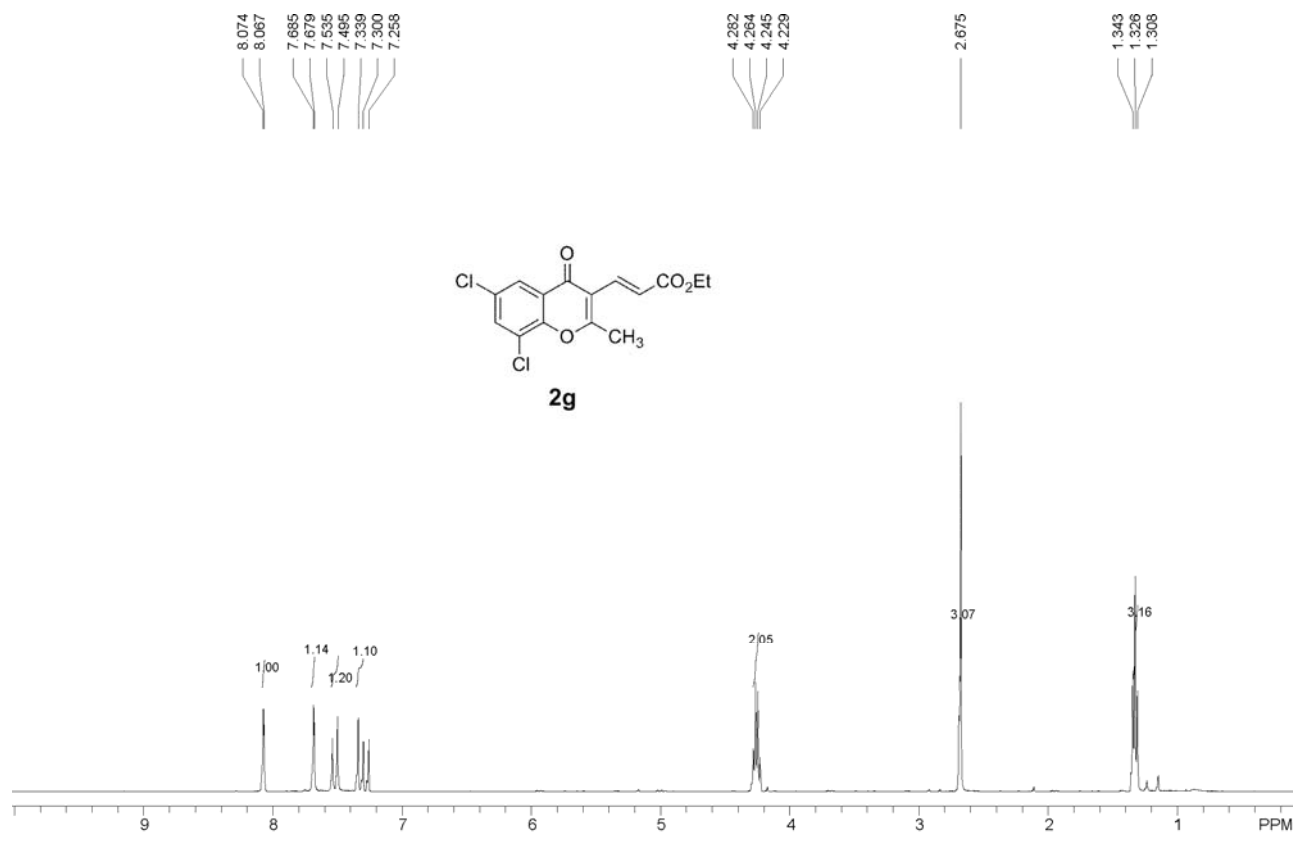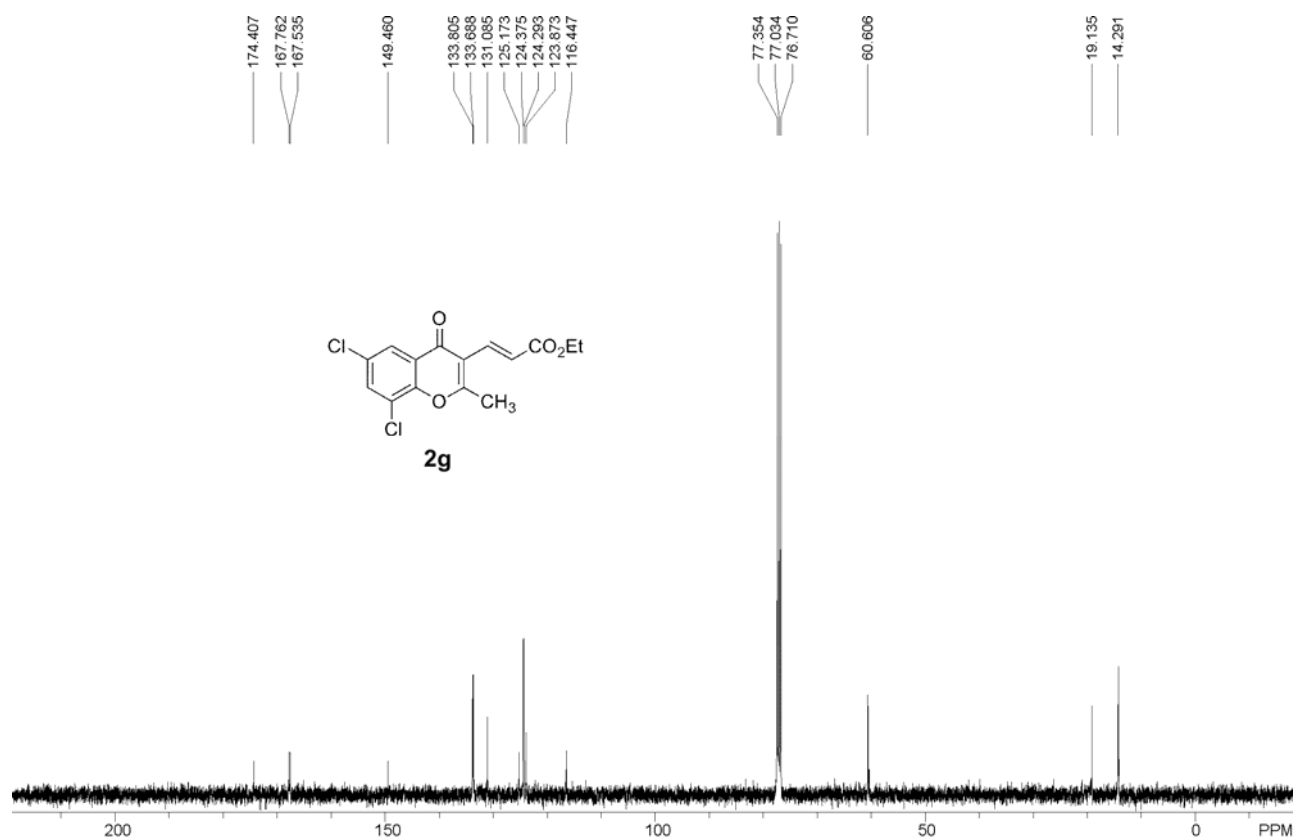

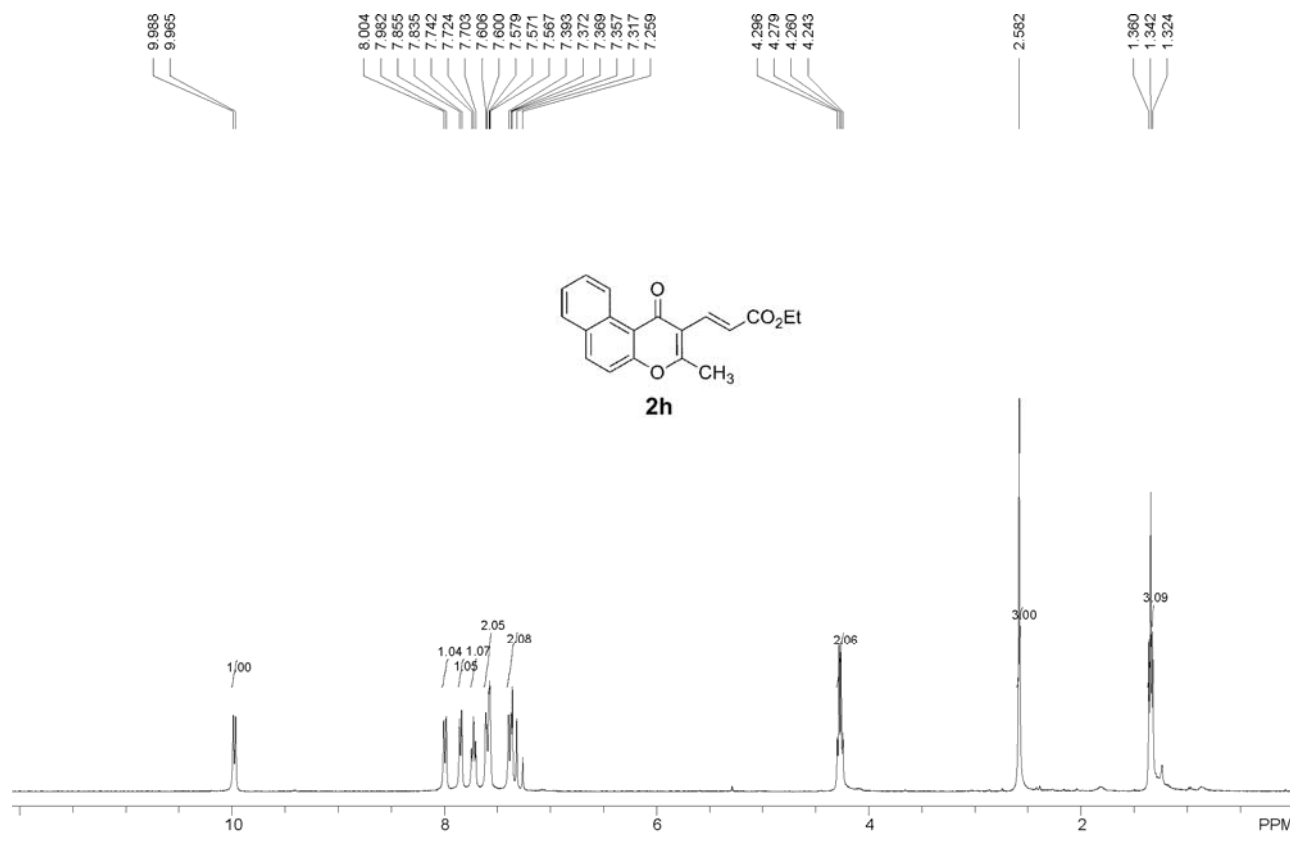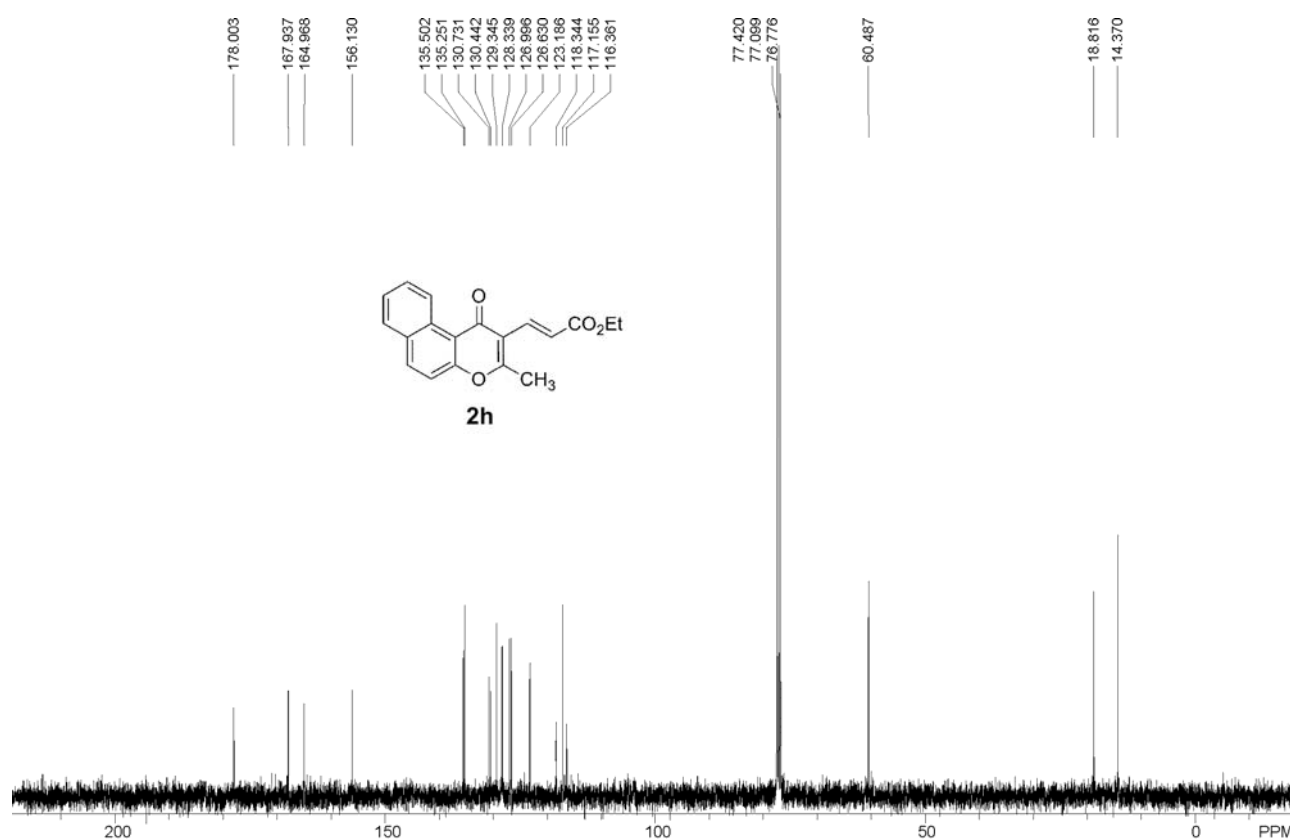

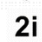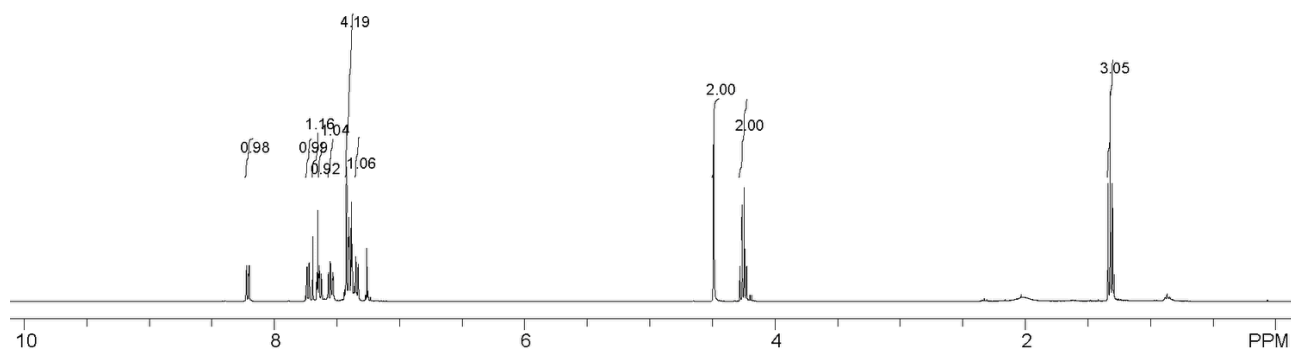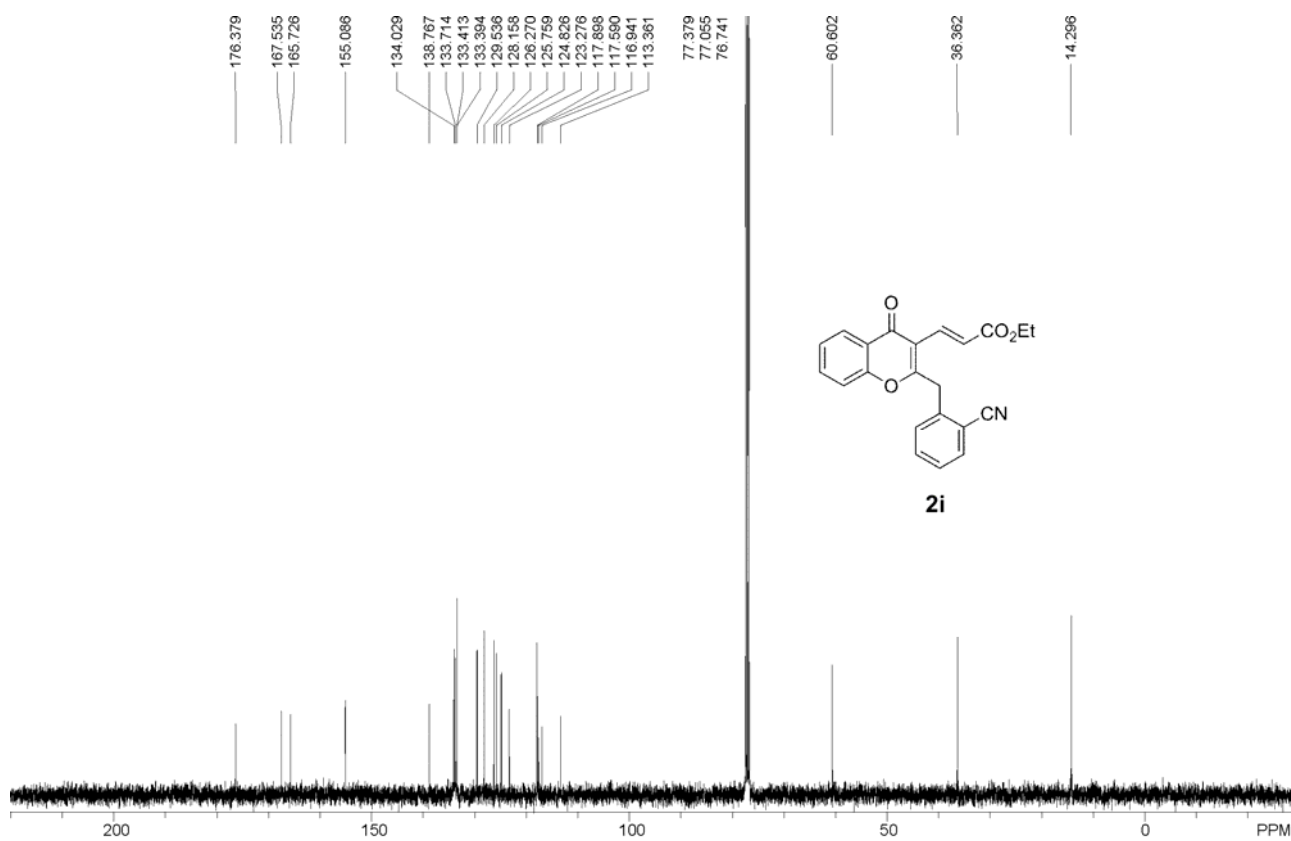

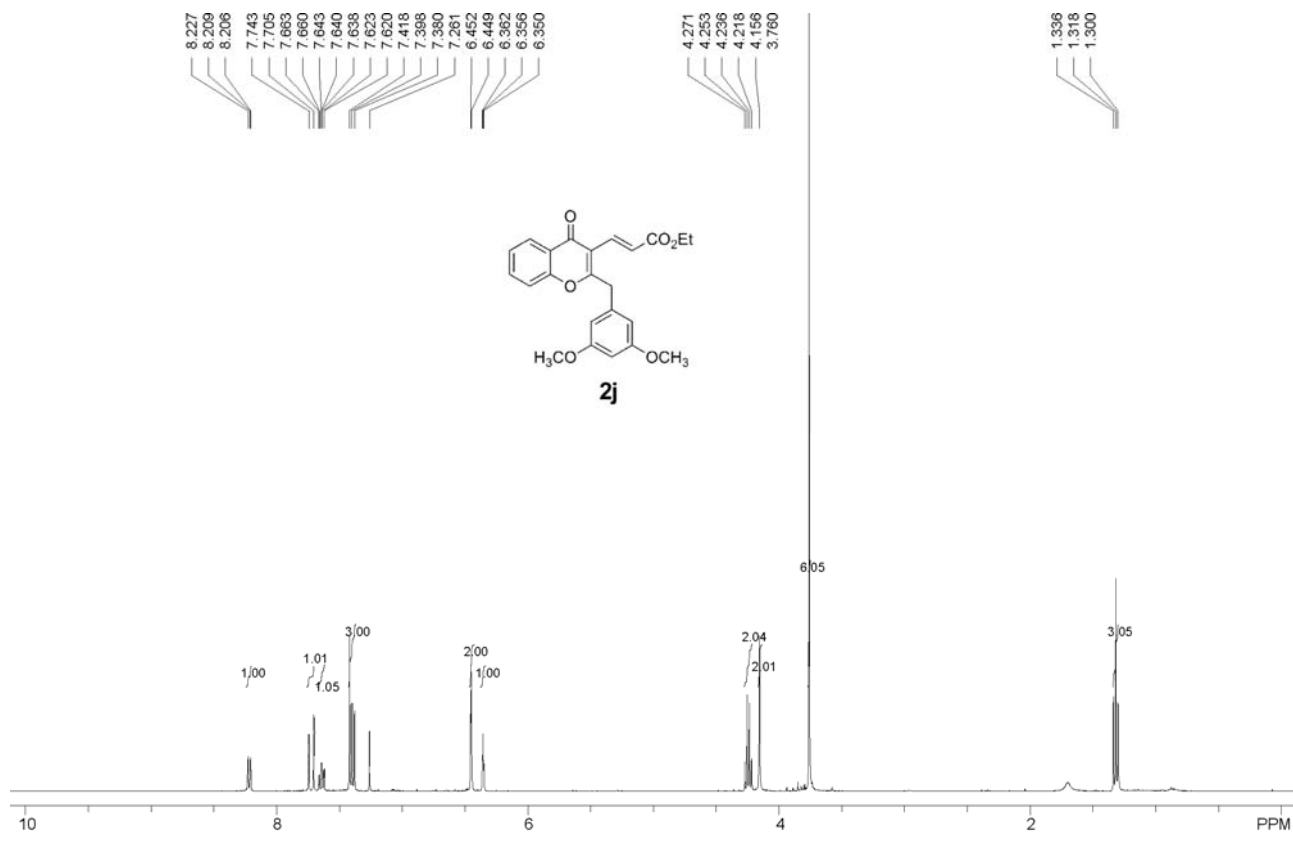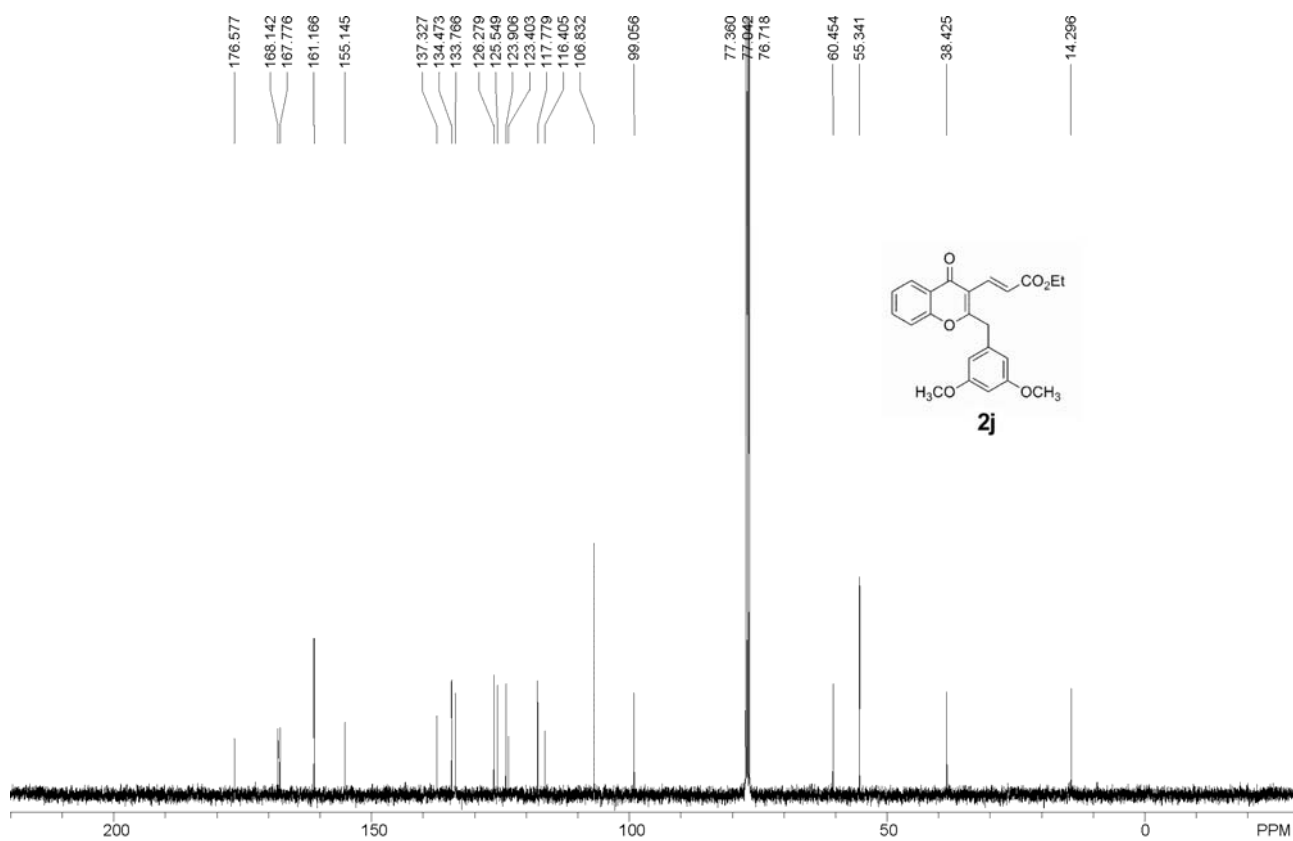

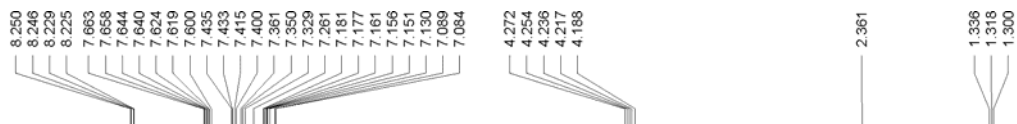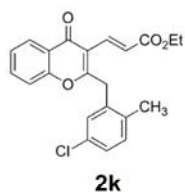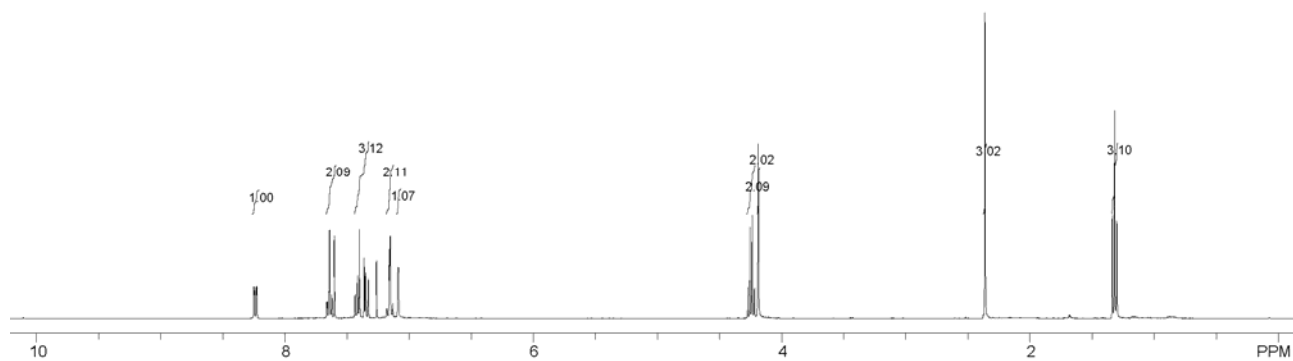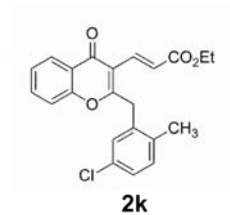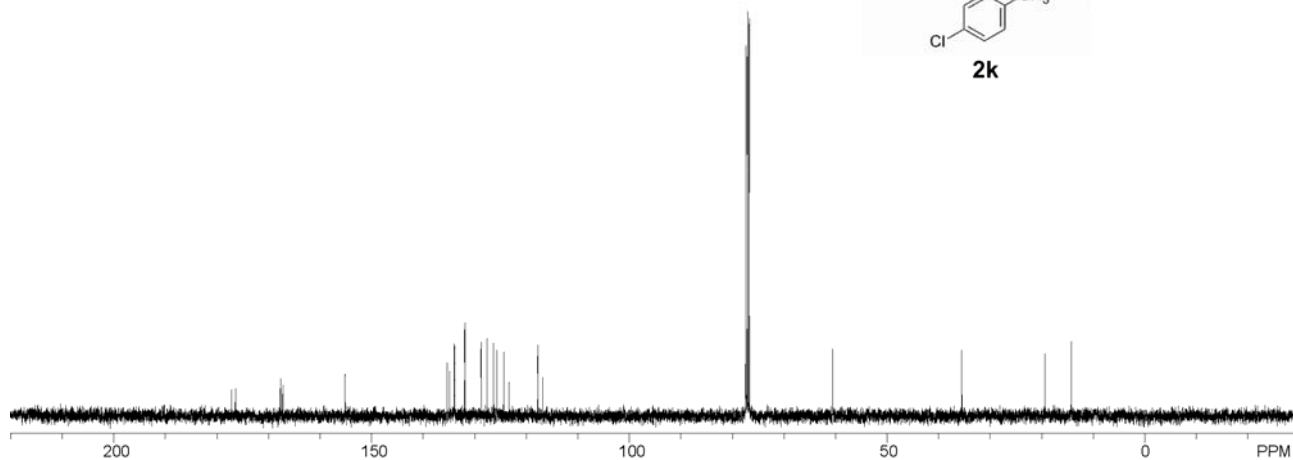

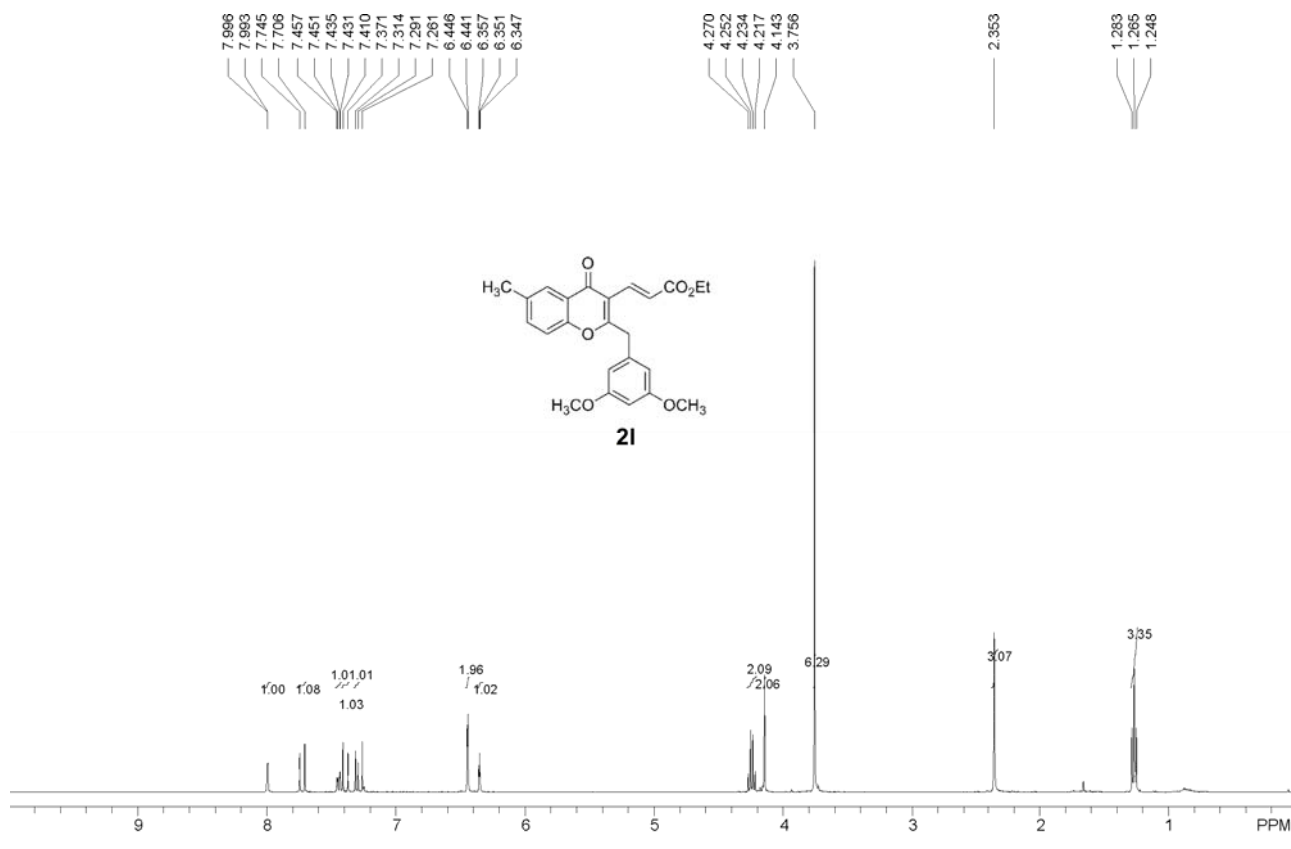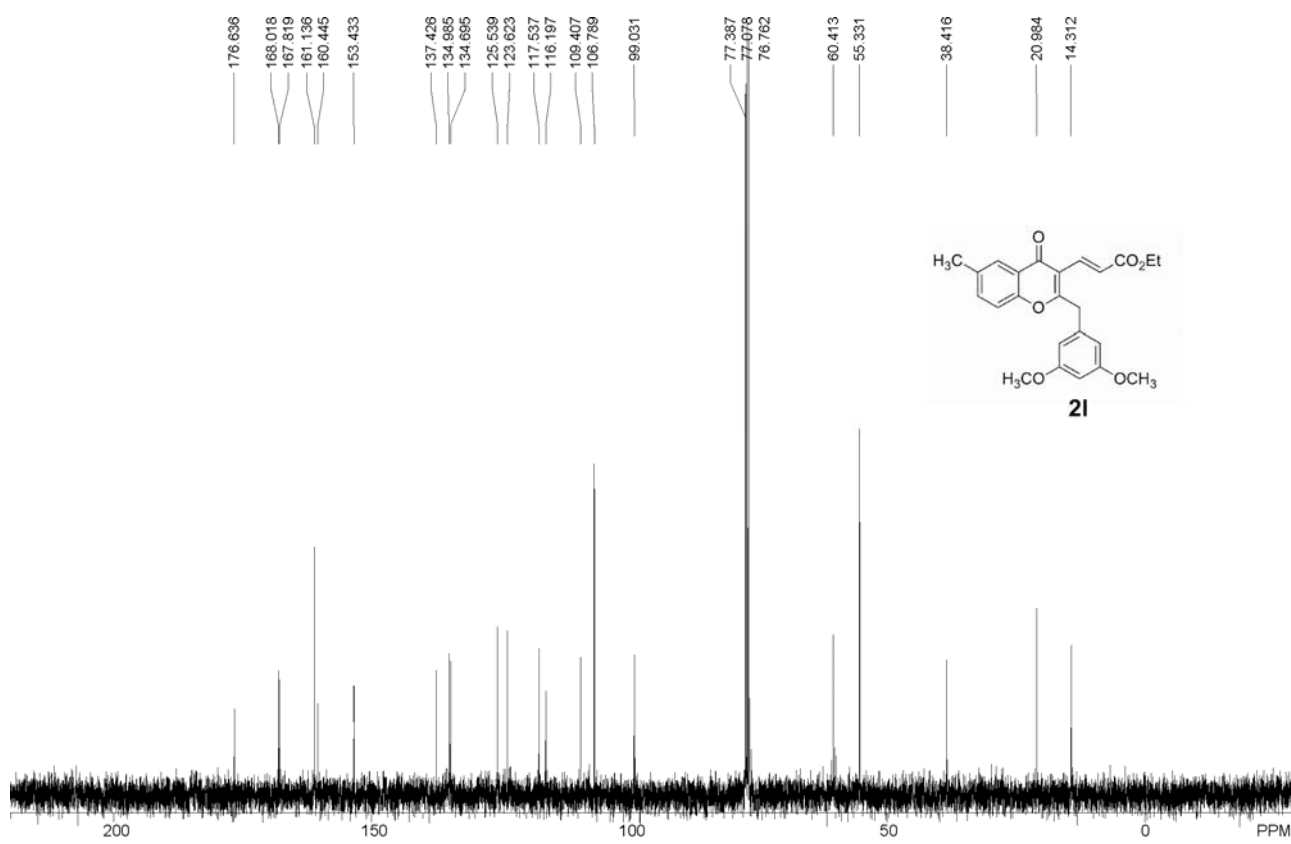

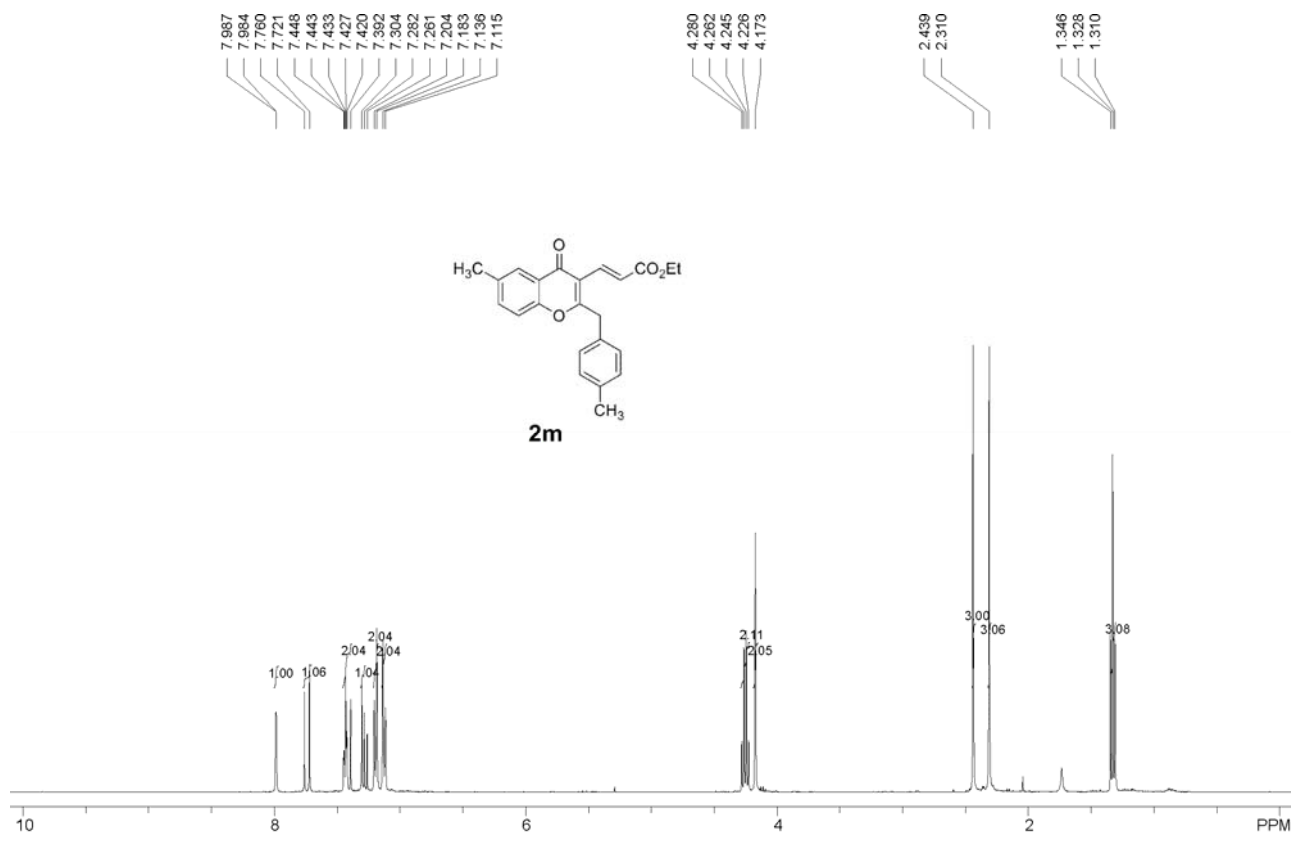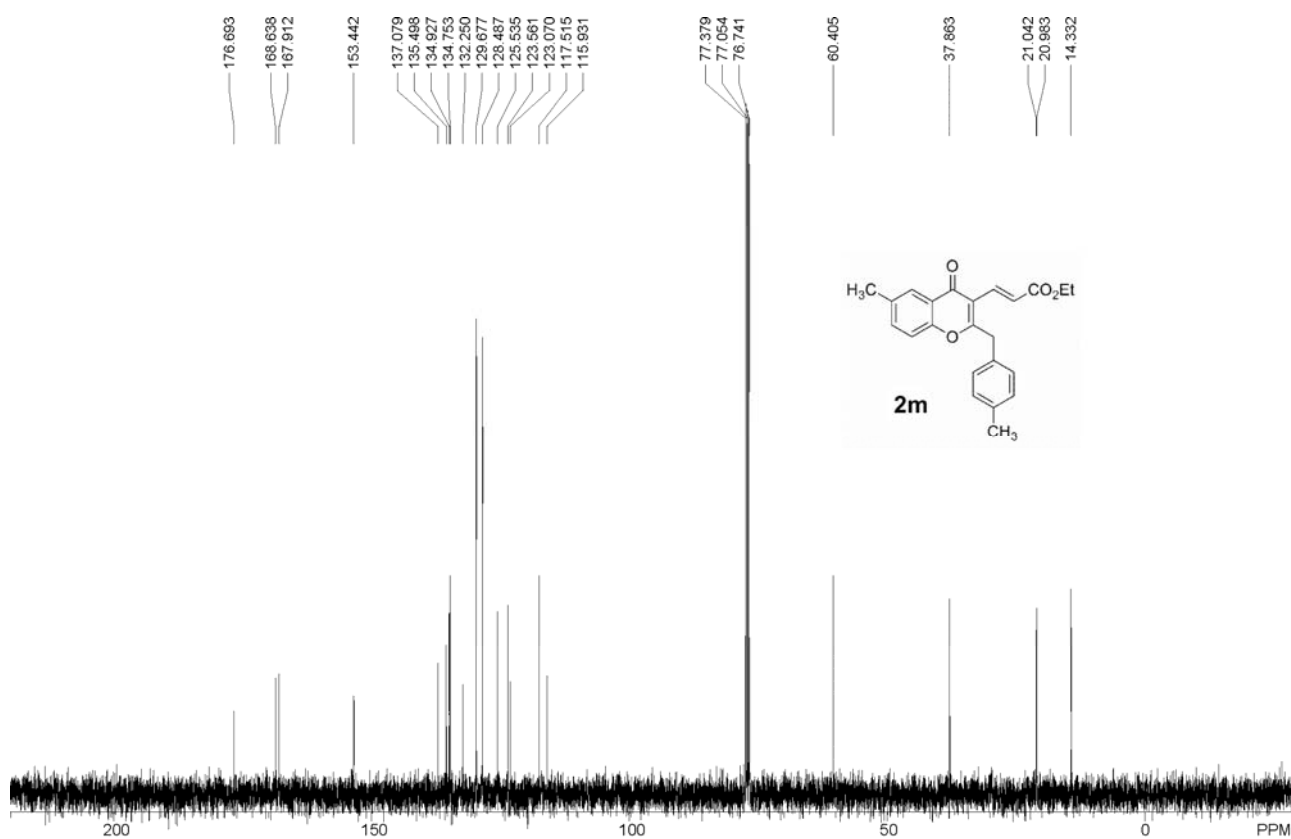

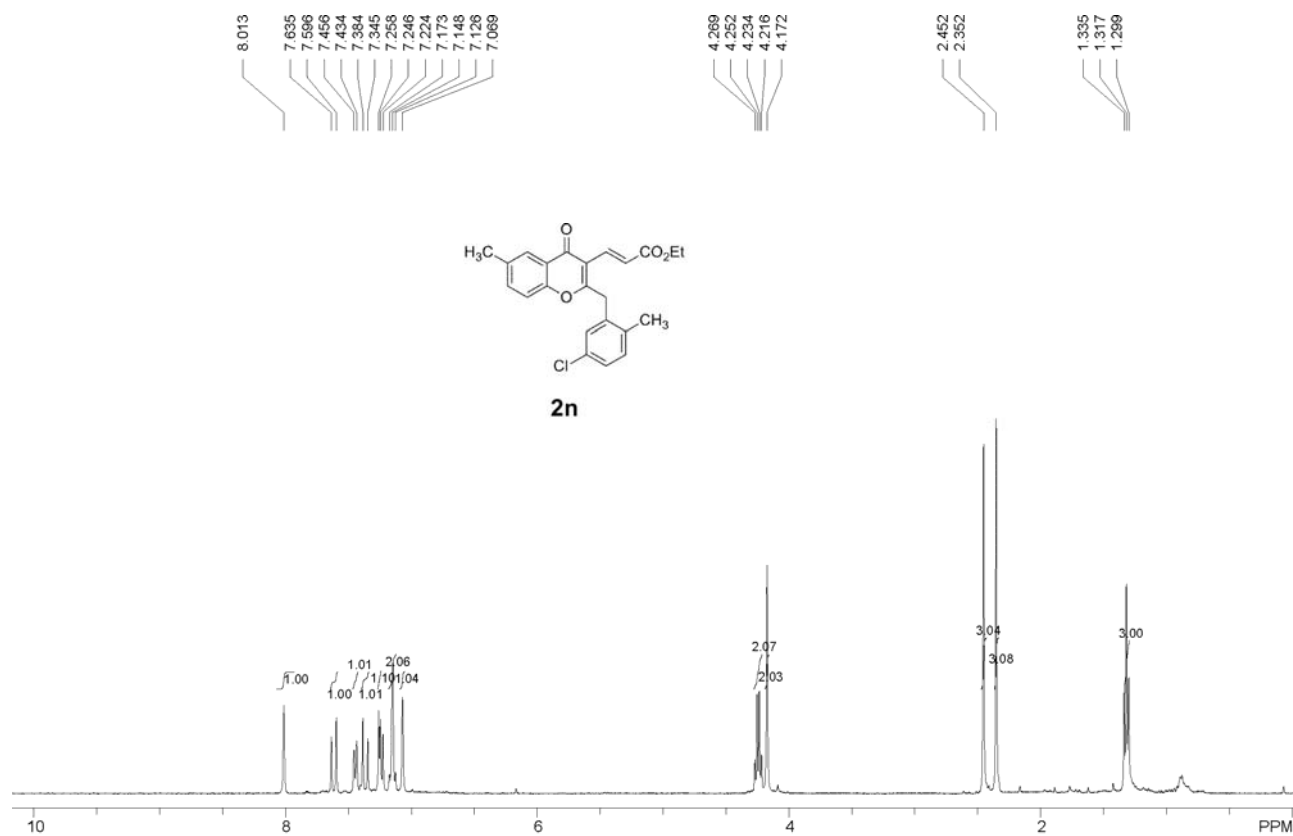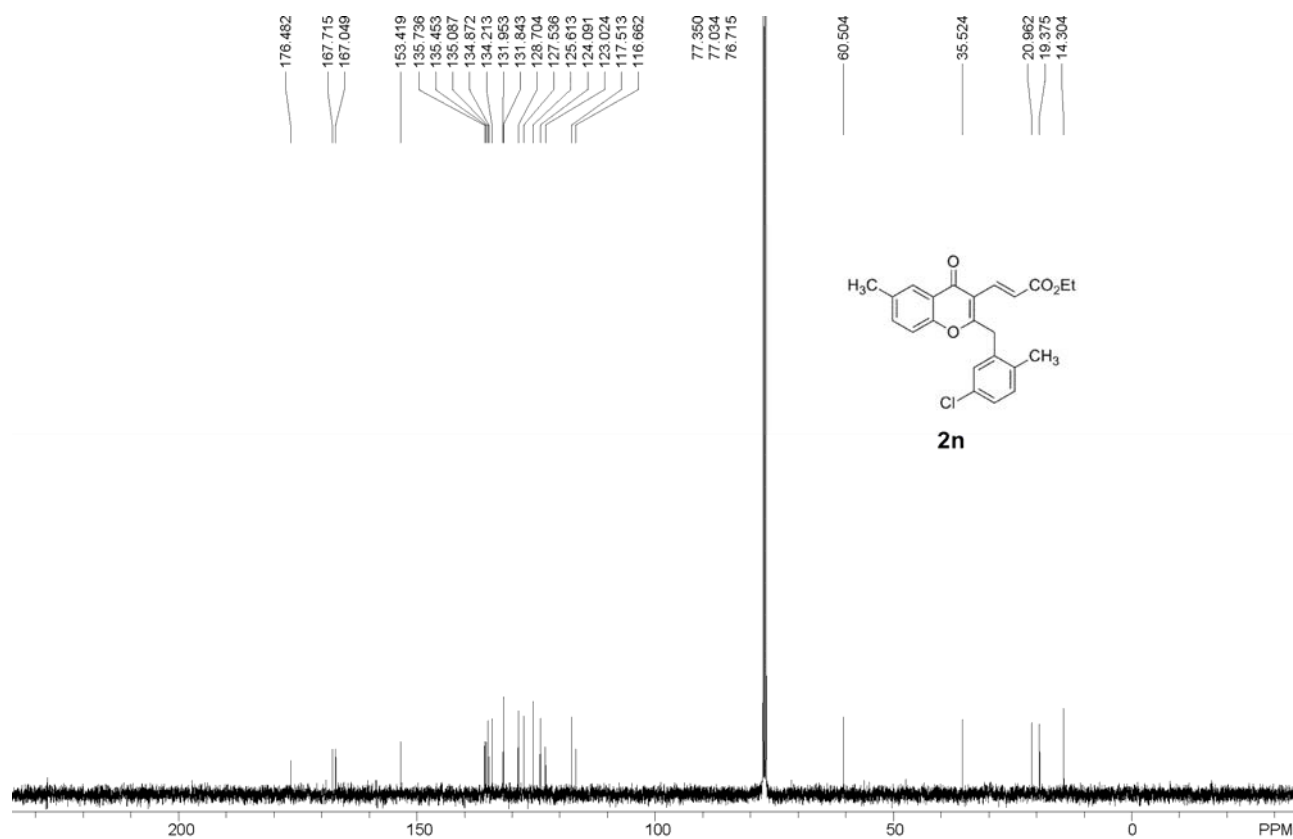

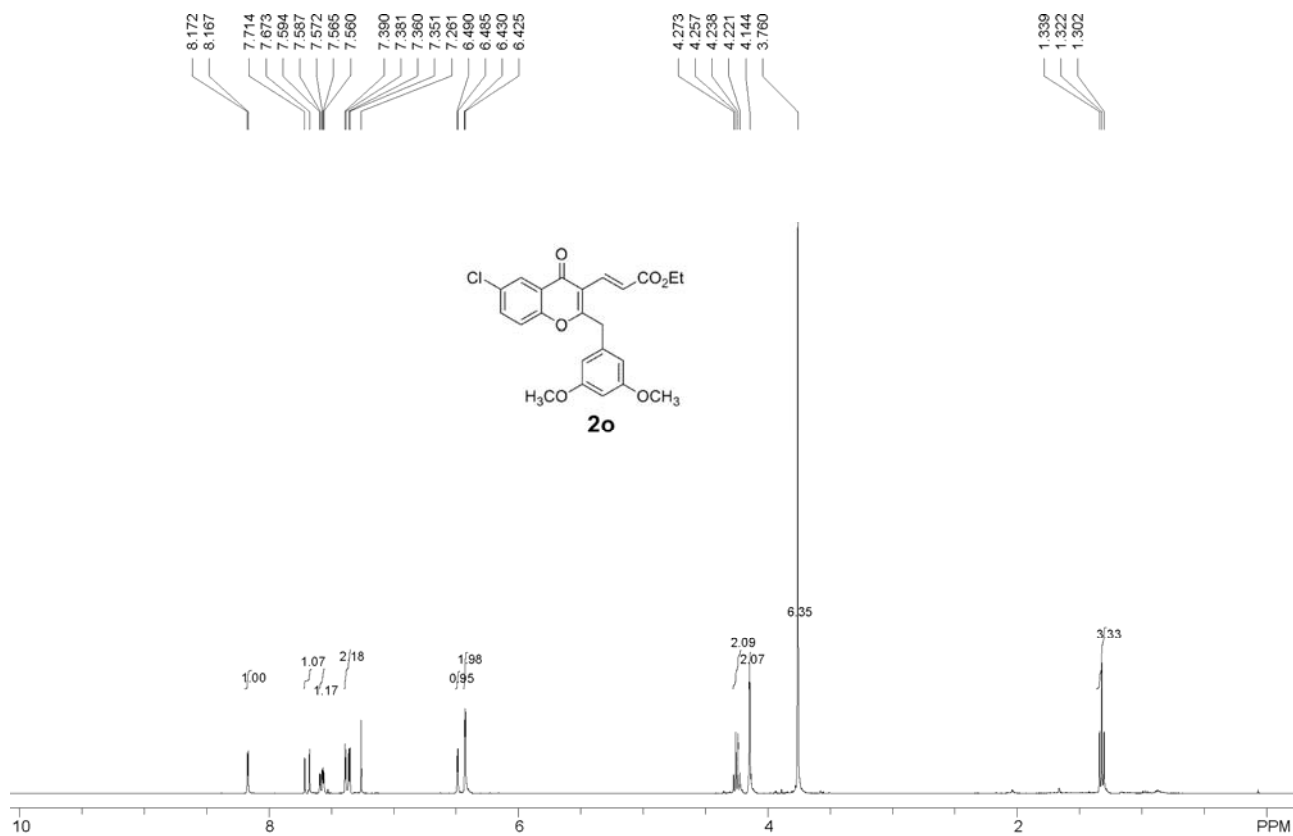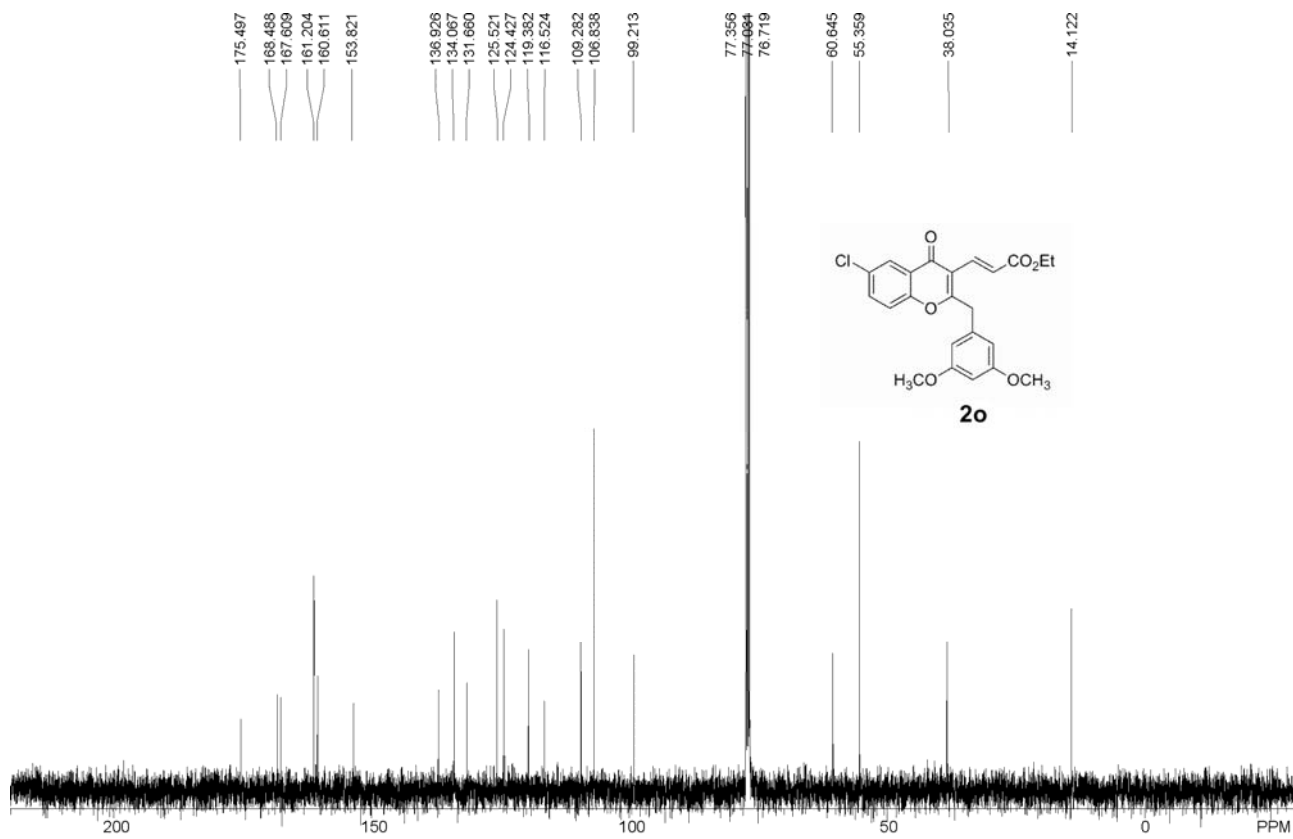

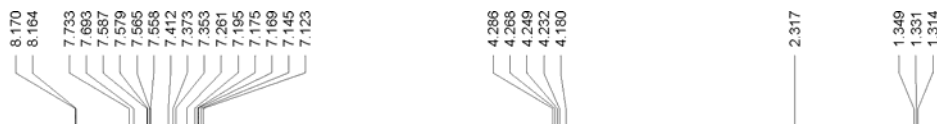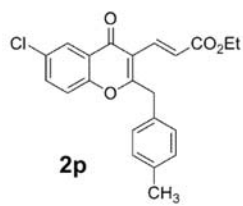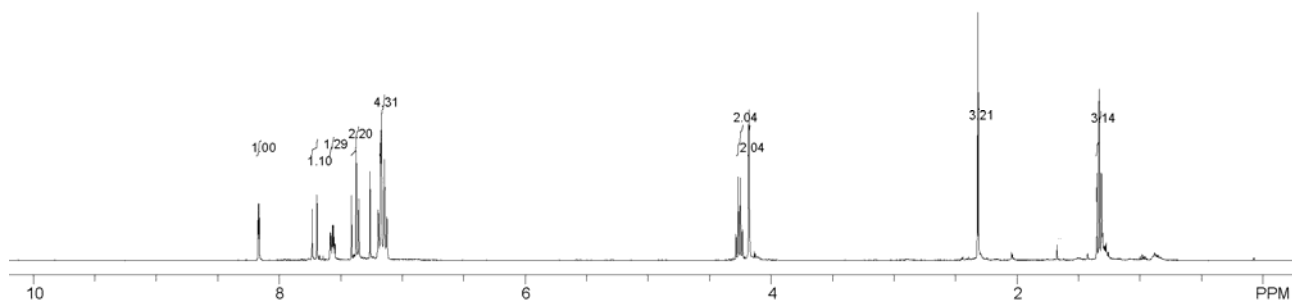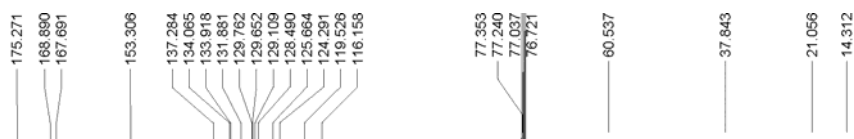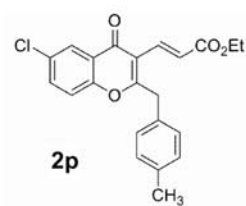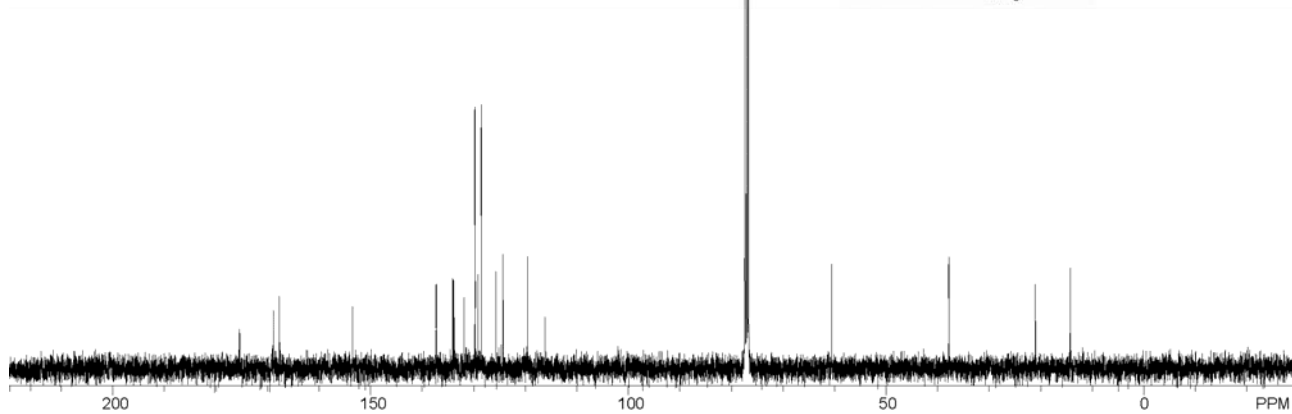

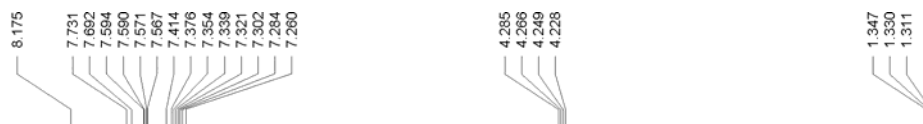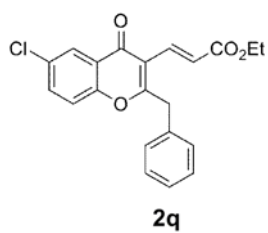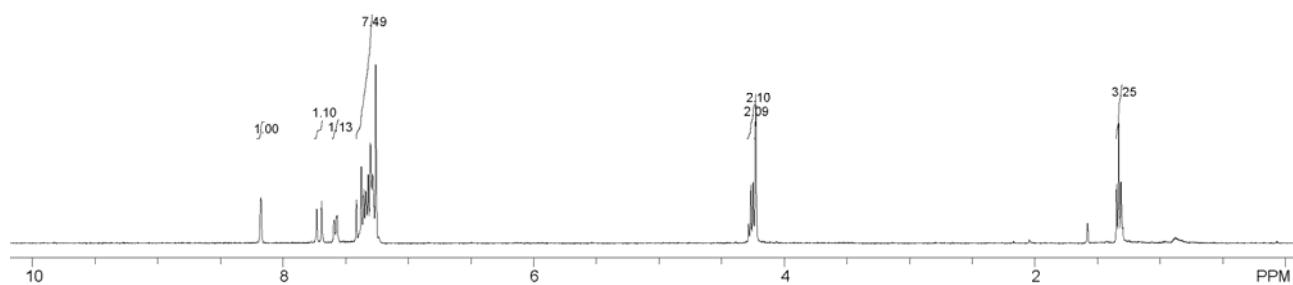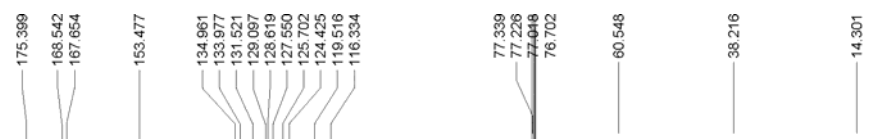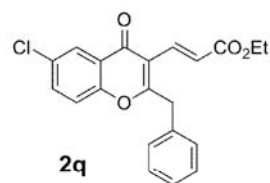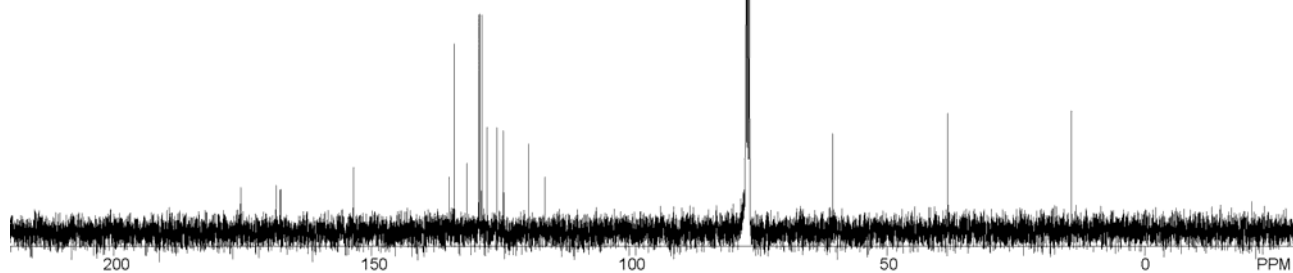

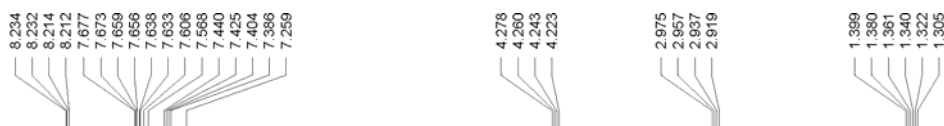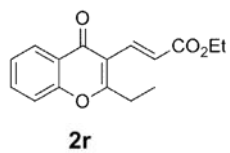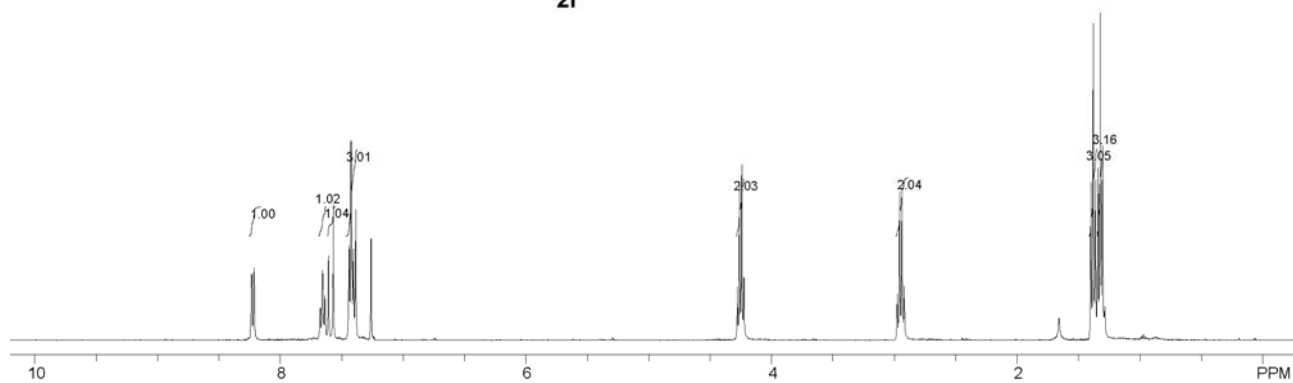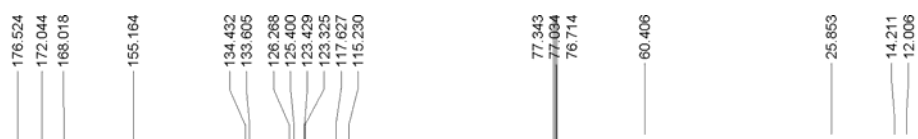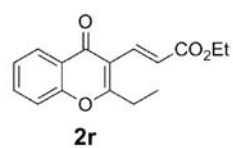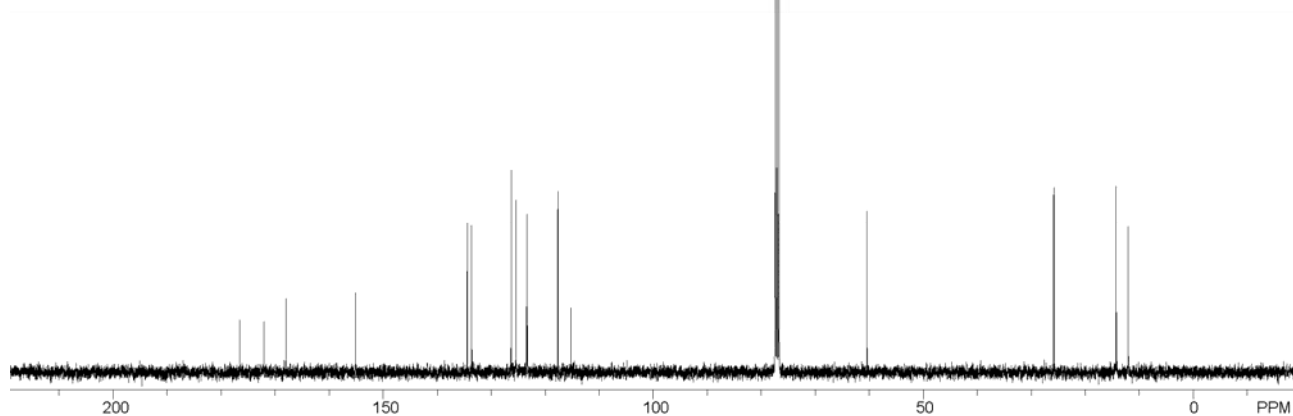

## V. X-ray crystal structure of 2d

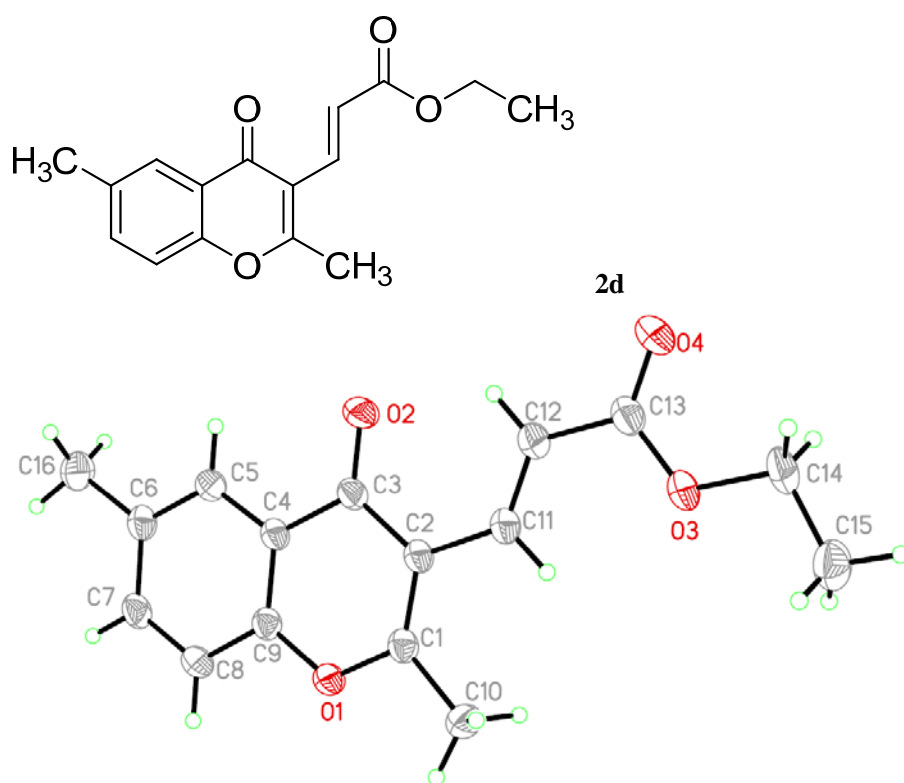

## VI. Reference

- [1] X. S. Fan, Y. Y. Wang, Y. Y. Qu, H. Y. Xu, Y. He, X. Y. Zhang, J. J. Wang, *J. Org. Chem.*, 2011, **76**, 982.
